1 **Phosphatidylethanolamine facilitates mitochondrial pyruvate entry to regulate metabolic**  
2 **flexibility**

3

4 Piyarat Siripoksup,<sup>1,2</sup> Guoshen Cao,<sup>1,3</sup> Ahmad A. Cluntun,<sup>1,3</sup> J. Alan Maschek,<sup>4,5</sup> Quentinn

5 Pearce,<sup>4</sup> Marisa J. Lang,<sup>1,5</sup> Hiroaki Eshima,<sup>1,7</sup> Precious C. Oporum,<sup>1,5</sup> Ziad S. Mahmassani,<sup>1,2,7</sup>

6 Eric B. Taylor,<sup>6</sup> James E. Cox,<sup>1,3,4</sup> Micah J. Drummond,<sup>1,2,7</sup> Jared Rutter,<sup>1,3,8</sup> Katsuhiko

7 Funai.<sup>1,2,5,7,\*</sup>

8

9 <sup>1</sup>Diabetes & Metabolism Research Center, University of Utah, Salt Lake City, Utah, USA.

10 <sup>2</sup>Department of Physical Therapy & Athletic Training, University of Utah, Salt Lake City, Utah,  
11 USA.

12 <sup>3</sup>Department of Biochemistry University of Utah, Salt Lake City, Utah, USA.

13 <sup>4</sup>Metabolomics Core Research Facility, University of Utah, Salt Lake City, Utah, USA.

14 <sup>5</sup>Department of Nutrition & Integrative Physiology, University of Utah, Salt Lake City, Utah, USA.

15 <sup>6</sup>Fraternal Order of Eagles Diabetes Research Center, University of Iowa, Iowa City, Iowa, USA.

16 <sup>7</sup>Molecular Medicine Program, University of Utah, Salt Lake City, Utah, USA.

17 <sup>8</sup>Howard Hughes Medical Institute, University of Utah, Salt Lake City, Utah, USA.

18

19 \*Corresponding Author:

20 Katsuhiko Funai, Ph.D.

21 Diabetes & Metabolism Research Center

22 University of Utah

23

24 **Abstract**

25 Carbohydrates and lipids provide the majority of substrates to fuel mitochondrial oxidative  
26 phosphorylation (OXPHOS). Metabolic inflexibility, defined as an impaired ability to switch  
27 between these fuels, is implicated in a number of metabolic diseases. Here we explore the  
28 mechanism by which physical inactivity promotes metabolic inflexibility in skeletal muscle. We  
29 developed a mouse model of sedentariness by small mouse cage (SMC) that, unlike other  
30 classic models of disuse in mice, faithfully recapitulates metabolic responses that occur in  
31 humans. Bioenergetic phenotyping of mitochondria displayed metabolic inflexibility induced by  
32 physical inactivity, demonstrated by a reduction in pyruvate-stimulated respiration ( $J_{O_2}$ ) in  
33 absence of a change in palmitate-stimulated  $J_{O_2}$ . Pyruvate resistance in these mitochondria  
34 was likely driven by a decrease in phosphatidylethanolamine (PE) abundance in the  
35 mitochondrial membrane. Reduction in mitochondrial PE by deletion of phosphatidylserine  
36 decarboxylase (PSD) was sufficient to induce metabolic inflexibility measured at the whole-body  
37 level, as well as at the level of skeletal muscle mitochondria. Low mitochondrial PE was  
38 sufficient to increase glucose flux towards lactate. We further implicate that resistance to  
39 pyruvate metabolism is due to attenuated mitochondrial entry via mitochondrial pyruvate carrier  
40 (MPC). These findings suggest a novel mechanism by which mitochondrial PE directly regulates  
41 MPC activity to modulate metabolic flexibility.

42

## 43 **Introduction**

44 Chronic physical inactivity increases all-cause mortality by 30%, accounting for one death every  
45 44 seconds [1-4]. Sedentary behavior exacerbates the risk for many chronic diseases such as  
46 type 2 diabetes and cardiovascular diseases [5-7]. Systemic metabolic disturbances induced by  
47 inactivity is likely largely responsible for the pathogenesis of these conditions [7, 8]. Described  
48 often as “metabolic inflexibility”, long-term sedentariness impairs the ability to switch between  
49 glucose and fatty-acids to fuel ATP synthesis [9, 10]. Metabolic inflexibility that occurs with  
50 physical inactivity is primarily driven by the suppression of glucose metabolism in skeletal  
51 muscle. Disuse likely directly drives the metabolic reprogramming to attenuate glycolytic flux to  
52 mitochondria in the absence of elevated energy demand. The mechanism by which skeletal  
53 muscle mitochondrial metabolism adapts to chronic disuse is not well understood.

54  
55 Our understanding of the underlying molecular processes that drive inactivity-induced metabolic  
56 inflexibility has been limited partly due to the lack of appropriate pre-clinical models of human  
57 sedentary behavior [11]. Traditional murine models of muscle disuse or physical inactivity, such  
58 as hindlimb unloading, cast immobilization, and denervation models are well-suited to study  
59 muscle atrophy, but they do not phenocopy the systemic and skeletal muscle metabolic  
60 adaptations observed in humans [11, 12]. To address this important methodological gap, we  
61 adapted a novel mouse model of inactivity, small mouse cage (SMC) [13, 14] that more reliably  
62 induces metabolic perturbations with sedentariness. This model now enabled us to more  
63 rigorously investigate the interplay between mitochondrial energetics and metabolic inflexibility  
64 in the context of physical inactivity.

65  
66 Previously, we identified mitochondrial phosphatidylethanolamine (PE) to be an important  
67 regulator of mitochondrial oxidative phosphorylation (OXPHOS) that is induced by exercise  
68 training and suppressed with hindlimb unloading [15]. PE is highly concentrated in the inner

69 mitochondrial membrane (IMM) and is autonomously synthesized by phosphatidylserine  
70 carboxylase (PSD) [16, 17]. In mammalian systems, nearly all PE is synthesized in the IMM by  
71 PSD and exported to other regions of the cell, while the PE generated by the CDP-  
72 ethanolamine pathway in the endoplasmic reticulum does not translocate to mitochondria [18,  
73 19]. Human mutation in the Pisd gene causes mitochondrial disease [20-22]. We have  
74 previously shown that skeletal muscle-specific deletion of PSD (homozygous knockout) is lethal  
75 due to robust atrophy and weakness of the diaphragm muscle [15]. The consequence of a more  
76 modest reduction of mitochondrial PE, such that occurs with sedentariness, is unknown.  
77 Importantly, muscle phospholipid composition, particularly low PE, has been linked to metabolic  
78 inflexibility in humans [23-26].

79  
80 In this study, we implicate reduced muscle mitochondrial PE as the driving force behind  
81 inactivity-induced metabolic inflexibility. SMC intervention modestly lowered mitochondrial PE,  
82 concomitant to the suppression of glucose metabolism. We then recapitulated moderate  
83 reductions in mitochondrial PE using a skeletal muscle-specific heterozygous knockout of PSD  
84 (PSD-MHet). Unlike their homozygous counterparts, heterozygous deletion of PSD produced  
85 modest systemic and skeletal muscle phenotype that resembled many metabolic shifts found  
86 with the SMC intervention.

87

## 88 **Results**

### 89 **SMC housing induces metabolic inflexibility in male but not female mice**

90 Sedentary behavior promotes systemic and skeletal muscle metabolic inflexibility in humans [7,  
91 27]. In contrast, commonly utilized models of disuse in mice such as hindlimb unloading  
92 increases skeletal muscle glucose metabolism (Figure 1 – figure supplement 1A). To better  
93 model the metabolic disturbances observed in human inactivity, we developed a mouse model  
94 of physical inactivity using SMC (Figure 1A). Male and female wild-type C57BL/6J mice were

95 ambulatory or subjected to eight weeks of SMC housing that substantially restricted gross  
96 spontaneous movement (Figure 1B). Body mass, lean mass, and individual muscle masses  
97 were significantly reduced in male mice and not in female mice (Figure 1C&D and Figure 1 –  
98 figure supplement 1B). In contrast, SMC intervention did not alter adiposity in either sex,  
99 although there was a trend for greater adipose tissue masses only in female mice (Figure 1E  
100 and Figure 1 – figure supplement 1C). To evaluate the effects of reduced activity on metabolic  
101 flexibility, mice underwent indirect calorimetry for measurements of whole-body O<sub>2</sub> consumption  
102 (VO<sub>2</sub>) and respiratory exchange ratio [28]. VO<sub>2</sub> was not influenced with SMC in both sexes  
103 (Figure 1F&G), consistent with findings that changes in physical activity do not drive changes in  
104 total daily energy expenditure [29]. RER is an indicator of systemic substrate preference, where  
105 a value of 1.0 signifies a 100% reliance on carbohydrates, whereas a value of 0.7 indicates a  
106 100% reliance on lipids. Mice rely more on lipids during the light cycle when they are asleep,  
107 and shift to carbohydrate utilization during the dark cycle when they are active or eating.  
108 Notably, while SMC induced metabolic inflexibility in male mice, female mice demonstrated  
109 normal metabolic flexibility (Figure 1H&I). Specifically, SMC reduced the ability of male mice to  
110 shift to carbohydrate usage during the dark cycle. Further, consistent with attenuated systemic  
111 glucose metabolism, SMC intervention elevated fasting serum glucose in male mice (Figure 1J).

112

113 To examine glucose metabolism in skeletal muscle, we excised soleus muscles from male and  
114 female sham or SMC mice for the measurement of ex vivo 2-deoxyglucose uptake. Congruent  
115 with systemic metabolic inflexibility, SMC intervention reduced glucose uptake in both basal and  
116 insulin-stimulated conditions in males, but not in females (Figure 1K). These findings are  
117 consistent with the hypothesis that reduced skeletal muscle glucose metabolism drives systemic  
118 metabolic inflexibility induced by SMC. It is noteworthy that male mice became metabolically  
119 inflexible despite no increases in adiposity (Figure 1E and Figure 1 – figure supplement 1C).

120 Metabolic inflexibility also occurred independently of increases in food intake or serum cortisol  
121 levels. (Figure 1 – figure supplement 1D&E).

122

123 We sought to capitalize on the sexually dimorphic response to explore the mechanism by which  
124 SMC induces skeletal muscle metabolic inflexibility only in male mice. RNA sequencing of  
125 gastrocnemius muscles followed by KEGG pathway analysis revealed similarities and  
126 differences in gene set enrichment in a number of pathways between males and females  
127 (Figure 2A). The ribosomal pathway was among the most negatively enriched categories with  
128 both sexes, consistent with the notion that inactivity decreases muscle protein synthesis [30].  
129 Notably, metabolic pathways were reduced in males but not in females, suggesting that  
130 metabolic reprogramming induced by SMC may be unique to males. Given the central role of  
131 mitochondria in these pathways, we further examined the effects of SMC on skeletal muscle  
132 mitochondria.

133

### 134 **SMC housing reduces pyruvate-dependent respiration without altering palmitate-** 135 **stimulated respiration**

136 Previous reports suggest that reduced muscle mitochondrial content can potentially drive  
137 metabolic inflexibility induced by inactivity [7, 31]. However, our SMC intervention did not alter  
138 mitochondrial density in skeletal muscle (Figure 2B&C and Figure 2 – figure supplement 1A),  
139 indicating that lower mitochondrial content is not necessary for inactivity-induced suppression of  
140 skeletal muscle glucose metabolism [32]. To this end, we further examined respiratory function  
141 per unit of mitochondria. High-resolution respirometry experiments showed that SMC robustly  
142 diminished respiration ( $JO_2$ ) driven by pyruvate in male, but not female mice (Figure 2D),  
143 consistent with the notion that metabolic inflexibility is driven by mitochondria's ability to accept  
144 glycolytic substrates. Strikingly, there was no difference in  $JO_2$  fueled by palmitate (Figure 2E),  
145 indicating that the reduced ability of mitochondria to accept substrates is limited to glycolytic

146 substrates. Moreover, these changes occurred independently of changes in OXPHOS protein  
147 abundance per unit of mitochondria (Figure 2F and Figure 2 – figure supplement 1B).  
148  
149 Some studies indicate that mitochondrial electron leak can promote oxidative stress to suppress  
150 glucose metabolism [33]. Multiple labs including our group have reported that traditional models  
151 of disuse promote oxidative stress in skeletal muscle [34, 35]. However, our SMC intervention  
152 did not alter the ratio of reduced to oxidized glutathione (GSH:GSSG) (Figure 2G) nor reactive  
153 lipid aldehydes such as 4-hydroxynonenal (4-HNE) (Figure 2 – figure supplement 1C&D),  
154 demonstrating that physical inactivity induced by SMC does not promote oxidative stress. Using  
155 high-resolution fluorometry, we further confirmed mitochondrial electron leak ( $J_{H_2O_2}/J_{O_2}$ ) to be  
156 unaltered with the SMC intervention (Figure 2H). These findings are consistent with results from  
157 human bed rest studies [7, 36], ruling out oxidative stress as a mechanism by which SMC  
158 intervention suppresses skeletal muscle glucose metabolism.  
159  
160 What is the mechanism by which physical inactivity selectively suppresses mitochondrial  
161 pyruvate metabolism in skeletal muscle? SMC intervention had no effect on mRNA levels of  
162 pyruvate/glucose metabolism and TCA cycle, nor on protein levels of enzymes of pyruvate  
163 metabolism (Figure 3A-C and Figure 3 – figure supplement 1A), indicating that reductions in  
164 pyruvate oxidation cannot be attributed to changes in these enzymes. Mitochondrial membrane  
165 lipids are known to alter the activity of mitochondrial enzymes in multiple tissues including  
166 skeletal muscle [15, 37]. Particularly, disuse induced by hindlimb unloading reduces  
167 mitochondrial PE in skeletal muscle [15]. Thus, we examined the effect of SMC housing on the  
168 skeletal muscle mitochondrial lipidome. Using LC-MS/MS, we quantified a total of 243 lipids  
169 from skeletal muscle mitochondria of sham and SMC mice. Analyses of these lipids revealed a  
170 trend for an overall reduction in total phospholipid abundance with SMC in males but not in  
171 females (Figure 3 – figure supplement 1B). 73 out of the 243 lipids were significantly

172 downregulated with SMC in male mice (zero upregulated lipids) (Figure 3 – figure supplement  
173 1C) while only two reached statistical significance in female mice (Figure 3 – figure supplement  
174 1D). Among these lipids, PE was most robustly disproportionately downregulated in male mice  
175 (Figure 3C&D), consistent with our previous findings with that of hindlimb unloading [15].  
176 Reduced PE with SMC was specific to mitochondria and not reflected in total cellular PE content  
177 (Figure 3 – figure supplement 1E&F). Mitochondrial PE is almost exclusively generated by the  
178 enzyme PSD, which was substantially reduced in skeletal muscle with SMC (Figure 3E). Thus,  
179 we proceeded to investigate the role that mitochondrial PE may play in metabolic inflexibility  
180 induced by physical inactivity.

181

### 182 **Muscle PSD haploinsufficiency makes mice more susceptible to inactivity-induced** 183 **metabolic inflexibility**

184 Previously, we demonstrated that homozygous deletion of muscle PSD causes lethality due to  
185 metabolic and contractile failure in the diaphragm muscle [15]. Homozygous deletion promotes  
186 a reduction in mitochondrial PE that is far more robust in magnitude compared to changes in  
187 mitochondrial PE observed with SMC. To model a more modest reduction in skeletal muscle  
188 mitochondrial PE, we studied mice with tamoxifen-inducible muscle-specific PSD heterozygous  
189 deletion (PSD-MHet; PSD<sup>f/f</sup> and HSA-MerCreMer<sup>+/-</sup>) (Figure 4A). As designed, skeletal muscle  
190 from PSD-MHet mice had reduced PSD mRNA abundance compared to controls (PSD-MHet;  
191 PSD<sup>f/f</sup> and HSA-MerCreMer<sup>-/-</sup>) (Figure 4B), as well as modestly diminished skeletal muscle  
192 mitochondrial PE levels (Figure 4C). Unlike the PSD homozygous knockout mice, PSD-MHet  
193 appeared normal and healthy under unstressed conditions.

194

195 We placed control and PSD-MHet male mice on eight weeks of SMC to study their systemic and  
196 skeletal muscle metabolism. Muscle PSD haploinsufficiency did not influence body mass, body  
197 composition, food intake, serum cortisol, or masses of skeletal muscle and adipose tissues



198 (Figure 4D-F and Figure 4 – figure supplement 1A-C). Indirect calorimetry of these mice showed  
199 a slight reduction in whole-body  $VO_2$  in PSD-MHet compared to controls (Figure 4G), which was  
200 not explained by changes in physical activity (both virtually undetectably low with SMC).  
201 Consistent with our hypothesis that low mitochondrial PE may drive metabolic inflexibility, RER  
202 data revealed suppression of glucose metabolism during dark cycle in PSD-MHet mice  
203 compared to control mice (Figure 4H). Neither fasting glucose nor glucose tolerance was  
204 different between the groups (Figure 4I&J). However, circulating insulin levels at the 30-minute  
205 timepoint of the glucose tolerance test was higher in PSD-MHet compared to controls (Figure  
206 4K), suggesting that PSD haploinsufficiency may require greater circulating insulin to stimulate  
207 muscle glucose metabolism. Indeed, skeletal muscle glucose uptake was attenuated in PSD-  
208 MHet mice compared to control mice (Figure 4L). Collectively, these results suggest that muscle  
209 PE deficiency may impair skeletal muscle glucose metabolism to promote metabolic inflexibility.

210  
211 Similar to our results with the SMC intervention in wildtype mice, PSD haploinsufficiency did not  
212 alter mitochondrial content in skeletal muscle (Figure 5A&B and Figure 5 – supplemental figure  
213 1A). High-resolution respirometry experiments revealed that low mitochondrial PE coincides  
214 with reduced pyruvate-stimulated  $JO_2$ , without affecting OXPHOS protein content per unit of  
215 mitochondria (Figure 5C-E and Figure 5 – supplemental figure 1B). Unlike homozygous deletion  
216 of PSD, heterozygous knockout of PSD did not promote oxidative stress or mitochondrial  
217 electron leak (Figure 5F-H and Figure 5 – supplemental figure 1C). Taken together, these  
218 findings are consistent with the notion that low mitochondrial PE is sufficient to drive systemic  
219 and skeletal muscle metabolic inflexibility. To delve deeper into the mechanism by which  
220 mitochondrial PE abundance facilitates pyruvate metabolism, we performed additional  
221 experiments in murine C2C12 myotubes.

222

223 **Mitochondrial PE deficiency impairs pyruvate metabolism**

224 To study the effects of low mitochondrial PE, C2C12 myotubes were subjected to lentivirus-  
225 mediated knockdown with shRNA encoding either scrambled (shSC) or PSD (shPSD), which  
226 was confirmed by qPCR (Figure 6A). We took advantage of the slow turnover rate for  
227 phospholipid molecules and performed all experiments 3 days post-lentiviral infection to model  
228 modest reductions in mitochondrial PE (Figure 6B). Consistent with our observations *in vivo*,  
229 PSD knockdown attenuated pyruvate-stimulated  $JO_2$  or JATP (Figure 6C&D), but not palmitate-  
230 stimulated  $JO_2$  (Figure 6E). PSD knockdown also had no effect on OXPHOS content (total  
231 cellular or mitochondrial), mitochondrial electron leak, or oxidative stress (Figure 6F and Figure  
232 6 – figure supplement 1A-F). These findings indicate that cell-autonomous effects of PSD  
233 deletion are responsible for the phenotype observed *in vivo*.

234  
235 Knockdown of PSD very strikingly accelerated the yellowing of the culture medium compared to  
236 shSC cells (Figure 6G). Yellowing of cell culture media is usually indicative of higher  
237 acidification rate due to lactate production [38]. Indeed, lactate concentration in the media was  
238 substantially elevated in shPSD cells compared to shSC controls (Figure 6H), and analysis of  
239 C2C12 myotubes on the Seahorse Bioanalyzer revealed increased extracellular acidification  
240 (ECAR) rate with PSD deletion (Figure 6I). Together, these data likely indicate that low PE  
241 causes mitochondria to become resistant to pyruvate metabolism [38, 39].

242  
243 To more closely examine intracellular pyruvate metabolism, we performed stable isotope tracing  
244 using uniformly labeled  $^{13}C$ -glucose (Figure 7 and Figure 7 – supplemental figure 1). Targeted  
245 mass spectrometry analyses revealed that labeling for glycolytic metabolites leading up to  
246 pyruvate was elevated with PSD knockdown (Figure 7B&C), suggesting that low mitochondrial  
247 PE does not compromise glucose-to-pyruvate metabolism. Consistent with increased lactate  
248 concentration in the media, lactate labeling was higher in shPSD cells compared to shSC  
249 (Figure 7D). In contrast, low mitochondrial PE was not associated with increased labeling

250 towards TCA intermediates (Figure 7E-H), suggesting that flux towards lactate, and not TCA  
251 cycle, explains the increased labeling for the glycolytic metabolites. These findings are  
252 consistent with the notion that mitochondrial PE deficiency impairs mitochondrial pyruvate  
253 metabolism.

254

### 255 **Mitochondrial PE facilitates mitochondrial pyruvate entry**

256 We sought to identify the mechanism by which low mitochondrial PE attenuates pyruvate  
257 metabolism. Surprisingly, PSD deletion did not reduce protein or mRNA abundance of  
258 mitochondrial pyruvate carriers (MPC1 and MPC2) or pyruvate dehydrogenase (PDH) (Figure  
259 8A and Figure 8 – figure supplement 1A&B), suggesting that attenuated pyruvate metabolism is  
260 not explained by changes in abundance of these proteins. In fact, there was a statistically  
261 significant increase in LDH and a trend for an increase in PDH with PSD deletion. PSD is  
262 localized at the inner mitochondrial membrane to generate PE. Thus, we reasoned that the  
263 mitochondrial PE may regulate the activity of MPC, which also resides in the inner mitochondrial  
264 membrane [40, 41].

265

266 To test this possibility, we took a two-pronged approach to link MPC to a defect in pyruvate  
267 metabolism. First, we performed pyruvate-stimulated respirometry with or without the MPC  
268 inhibitor UK-5099 [42]. Consistent with UK-5099's action on MPC, pyruvate-stimulated  $JO_2$  was  
269 significantly reduced in shSC myotubes (Figure 8B). As expected, MPC inhibition did not  
270 completely suppress  $JO_2$  due to anaplerosis. Strikingly, MPC-inhibited  $JO_2$  in shSC cells were  
271 similar to  $JO_2$  in shPSD cells without UK-5099, consistent with the notion that reduced  $JO_2$  in  
272 shPSD cells is due to attenuated MPC activity. Furthermore, UK-5099 had no effect on  $JO_2$  in  
273 shPSD cells, confirming that residual  $JO_2$  in shPSD cells is independent of pyruvate entry via  
274 MPC. Second, we compared  $JO_2$  in response to pyruvate or methyl-pyruvate (MePyr). MePyr is  
275 a pyruvate-analog that can bypass the MPC, diffuse freely into the mitochondrial matrix, and

276 subsequently demethylated to become mitochondrial pyruvate [43]. MePyr rescued  $JO_2$  in  
277 shPSD myotubes to pyruvate-stimulated  $JO_2$  levels in shSC cells (Figure 8C). Taken together,  
278 these findings suggest that low mitochondrial PE attenuates MPC activity to inhibit mitochondrial  
279 pyruvate metabolism.

280

## 281 **Discussion**

282 Skeletal muscle disuse or physical inactivity is linked to 35 chronic diseases [4, 44]. Many of  
283 these conditions are attributed to metabolic disturbances caused by sedentary behavior.

284 Nevertheless, the mechanisms by which physical inactivity alters systemic and skeletal muscle  
285 metabolism have been poorly defined, likely due to the lack of pre-clinical models [11, 12]. In  
286 this study, we developed a novel mouse model of inactivity that reliably induces metabolic  
287 inflexibility in male C57BL/6J mice. Metabolic inflexibility was likely driven by pyruvate  
288 resistance in skeletal muscle mitochondria. We implicate inactivity-induced downregulation of  
289 mitochondrial PE as a driver of pyruvate resistance. Mice with skeletal muscle-specific deletion  
290 of PSD was sufficient to recapitulate metabolic inflexibility and mitochondrial pyruvate resistance  
291 *in vivo* and *in vitro*. Using stable isotope tracing and high-resolution respirometry, we  
292 demonstrate that PE likely directly acts on MPC to facilitate mitochondrial pyruvate entry.

293

294 Oxidative stress has been implicated in pathogenesis of inactivity-induced metabolic inflexibility  
295 [4, 44]. Indeed, skeletal muscle oxidative stress is commonly manifested in many of the  
296 traditional models of mouse disuse [11, 12]. However, while these models are useful in studying  
297 muscle atrophy, mice do not develop systemic and skeletal muscle metabolic adaptation  
298 observed with human sedentary behavior [11, 12]. In our newly developed SMC model,  
299 metabolic inflexibility and suppression of glucose metabolism is faithfully recapitulated, but  
300 muscles from this model of inactivity did not exhibit oxidative stress (glutathione, lipid  
301 hydroperoxides, mitochondrial electron leak). Notably, our findings from the SMC model

302 reconcile with results from human bedrest studies that oxidative stress cannot explain metabolic  
303 inflexibility [36].

304

305 Previously we demonstrated that muscle mitochondrial PE becomes elevated with exercise  
306 training and decreased with hindlimb unloading [15]. Unlike oxidative stress, SMC reduced  
307 skeletal muscle mitochondrial PE concomitant to the development of metabolic inflexibility. What  
308 are the mechanisms by which exercise or inactivity promotes changes in muscle mitochondrial  
309 PE? In our previous study, as well as in the current study, changes in mitochondrial PE  
310 coincided with mRNA abundance of PSD, an enzyme that generates PE in the inner  
311 mitochondrial membrane. We believe that changes in PSD levels likely drive the changes in  
312 mitochondrial PE abundance. It is currently unknown whether PSD activity is regulated by post-  
313 translational modification. It is also possible that there are changes in the upstream mechanism  
314 for mitochondrial PE synthesis. PSD generates PE from mitochondrial PS, which is synthesized  
315 by PS synthase 1 and 2 in the endoplasmic reticulum [45, 46] and transported to mitochondria  
316 via Preli3b [47]. Finally, it would be important to determine mechanism for the transcriptional  
317 control of PSD.

318

319 By an unknown reason, PE generated at the endoplasmic reticulum by the Kennedy Pathway  
320 do not enter mitochondria [16]. This is exemplified by findings that inhibition of PE synthesis at  
321 the ER does not reduce mitochondrial function in skeletal muscle [48, 49]. In fact, deletion of  
322 ECT (CTP:phosphoethanolamine cytidyltransferase, an intermediate step in PE synthesis)  
323 increases mitochondrial content, an observation that may be explained by a compensatory  
324 increase in muscle PSD [48]. Similarly, deletion of CEPT1 (choline/ethanolamine  
325 phosphotransferase, the final step in PE synthesis) increases skeletal muscle glucose  
326 metabolism [49]. Thus, combined with our previous report on muscle-specific homozygous  
327 deletion of PSD [15], the current study emphasizes that the mitochondrial PE pool remains

328 distinct from that of the endoplasmic reticulum. This is also consistent with findings in yeast, as  
329 PE generated by PSD with a forced localization at the outer mitochondrial membrane or  
330 endoplasmic reticulum have differential cellular consequences [50].

331

332 One of the critical findings of this study was that low mitochondrial PE coincided with pyruvate  
333 resistance, but not with palmitate-stimulated  $\text{JO}_2$ . We demonstrate that PE likely directly  
334 facilitates MPC to promote mitochondrial pyruvate uptake, which takes place across the inner  
335 mitochondrial membrane where PE is enriched. Meanwhile, the rate-limiting step for fatty acid  
336 oxidation is at the step of carnitine palmitoyl transferase-1 (CPT1), which is localized on the  
337 outside of the outer mitochondrial membrane [51]. Not only is CPT1 not a transmembrane  
338 protein, but it is also localized at the outer mitochondrial membrane where PE is less  
339 concentrated [52]. The enzyme equivalent to the MPC for fatty acid oxidation is  
340 carnitine/acylcarnitine translocase which is located in the inner mitochondrial membrane, but  
341 this enzyme is not the rate-limiting step of palmitate entry nor palmitate oxidation [53, 54]. Thus,  
342 we believe that differential subcellular localization of the rate-limiting step for pyruvate or  
343 palmitate oxidation contributes to the disproportionate influence of low mitochondrial PE on  
344 substrate preference.

345

346 Yellowing of cell culture media was the most apparent and robust phenotype observed with  
347 PSD knockdown *in vitro*. Our flux experiments reveal that this is a direct result of accelerated  
348 flux of glucose towards lactate. Experiments with UK-5099 and MePyr suggest that pyruvate  
349 resistance in PSD deficient cells are attributed to the effects of PE on MPC. Multiple studies  
350 show that inhibition of MPC promotes resistance for mitochondria to oxidize glycolytic  
351 substrates [40, 41, 55, 56]. We believe that the effects of PE deficiency on MPC is the  
352 mechanism behind the metabolic inflexible phenotype observed in PSD-MHet mice. We further  
353 reason that metabolic inflexibility caused by sedentariness is attributed to low mitochondrial PE

354 which in turn reduces mitochondrial pyruvate entry. It would be important for future studies to  
355 elucidate whether PE directly affects the stability of MPC or its post-translational modifications  
356 to regulate pyruvate entry.

357

358 In conclusion, the current study demonstrates a novel mechanism by which PE facilitates  
359 mitochondrial pyruvate entry. We show that a modest reduction in mitochondrial PE is sufficient  
360 to promote resistance towards pyruvate oxidation both *in vitro* and *in vivo*. These observations  
361 were further extrapolated by findings that pyruvate resistance can be rescued by the membrane  
362 permeable MePyr, and that the MPC inhibitor UK-5099 can phenocopy the effects of low  
363 mitochondrial PE. We propose that this process drives the metabolic inflexibility induced by  
364 physical inactivity. Resistance to pyruvate oxidation may represent a selective advantage for  
365 mammals in a state of reduced energy demand, such that substrates are shunted away from  
366 skeletal muscle and stored away for subsequent energetic needs. In the modern age of  
367 abundant food supply, inactivity-driven resistance for glycolytic substrates can exacerbate the  
368 development of metabolic diseases.

369

370 **Materials and methods**

371 **Animals**

372 Eight-week old C57BL/6J mice were purchased from the Jackson Laboratory (Strain# 000664)  
373 for initial small mouse cage experiments. Heterozygous PSD-MHet mice were generated by  
374 crossing our conditional PSD knockout (PSDcKO<sup>+/+</sup>) mice (previously described [15]).  
375 PSDcKO<sup>+/+</sup> mice harbor loxP sites flanking exons 4 to 8 of the mouse PSD gene. These mice  
376 were crossed with HSA-MerCreMer mice (HSA-MerCreMer, tamoxifen inducible  $\alpha$ -human  
377 skeletal actin Cre, courtesy of K. Esser, University of Florida). All mice were bred onto  
378 C57BL/6J background and were born at normal Mendelian ratios. Tamoxifen (final  
379 concentration of 10 mg ml<sup>-1</sup>) is injected intraperitoneally (7.5 $\mu$ L/g of bodyweight) to PSD-Mhet  
380 mice and their respective controls for 5 consecutive days. Mice were maintained on a 12-hour  
381 light/12-hour dark cycle in a temperature-controlled room. All animals were fasted for 4 hours  
382 prior to tissue collection or experiments. Prior to all terminal experiments and tissue harvesting,  
383 mice were given an intraperitoneal injection of 80 mg/kg ketamine and 10 mg/kg xylazine. All  
384 protocols were approved by Institutional Animal Care and Use Committee at the University of  
385 Utah.

386

387 **Small mouse cage**

388 Modified and further developed from Mahmassani et al. [14] and Marmonti et al. [13], SMC is a  
389 rectangular box produced from acrylic plastic, made at the University of Utah's Machine Shop  
390 Core. Bedding is placed one-third of the height leaving 4 cm of clearance height. Air holes are  
391 designed on all four sides to facilitate air circulation. One air hole on the side was plugged with a  
392 Hydropac water lixit (Lab Products Inc., Seaford, Delaware) providing water ad libitum and one  
393 air hole on the top is compatible with the hydration system of the Columbus Instruments  
394 Oxymax Lab Animal Monitoring System (CLAMS) for determination of whole animal energy  
395 expenditure. Abundance of food is provided on top of the bedding to allow ad libitum food



396 consumption. Variable water leakage and crumbling of food are caveats to the attainment of  
397 accurate food and water intake in the SMC. Bedding, food, and water were changed every 2-3  
398 days to ensure cleanliness. Two SMC cages can fit in one regular mouse cage. Some  
399 experiments were performed with sham or SMC mice housed in pairs, while other experiments  
400 were performed with separate cages for sham or SMC mice.

401

### 402 **Indirect Calorimetry**

403 The Columbus Instruments Lab Monitoring System were used to measure  $VO_2$ , RER  
404 (respiratory exchange ratio,  $VCO_2/VO_2$ ), food intake, and physical activity (for sham animals  
405 only) of sham and SMC mice during Week 7 or 8 of SMC. Mice were individually caged and  
406 acclimated for over 24 h in the system before data were collected. Body composition was  
407 determined using the Bruker Minispec NMR (Bruker).

408

### 409 **Glucose tolerance test**

410 Intraperitoneal glucose tolerance tests were performed by injection of 1 mg glucose per gram  
411 body mass during Week 8 of SMC, at least 3 days prior to sacrifice. Mice were fasted for 4  
412 hours prior glucose injection. Blood glucose was measured before glucose injection and 15, 30,  
413 60, and 120 minutes after injection via tail bleed with a handheld glucometer (Bayer Contour  
414 7151H). In a separate set of experiments, mice were injected with 1 mg glucose per gram body  
415 mass, and blood was taken from the facial vein at the 30-minute time point for insulin  
416 quantification.

417

### 418 ***Ex vivo* skeletal muscle [ $^3H$ ]2-deoxy-D-glucose uptake**

419 *Ex vivo* glucose uptake was measured in soleus muscle as previously described [cite Funai  
420 2013, 2016]. In brief, soleus muscles were dissected and placed in a recovery buffer (KHB with  
421 0.1% BSA, 8 mM glucose, and 2 mM mannitol) at 37°C for 10 minutes. After incubation in

422 recovery buffer, muscles were moved to preincubation buffer (KHB with 0.1% BSA, 2mM  
423 sodium pyruvate, and 6 mM mannitol) with or without 200  $\mu$ U/mL insulin for 15 minutes for  
424 soleus and with or without 600  $\mu$ U/mL insulin for EDL. After preincubation, muscles were placed  
425 in incubation buffer (KHB with 0.1% BSA, 9 mM [ $^{14}$ C]mannitol, 1 mM [ $^3$ H]2-deoxyglucose) with  
426 or without 200  $\mu$ U/mL insulin for 15 minutes. Contralateral muscles were used for basal or  
427 insulin-stimulated measurements. After incubation, muscles were blotted dry on ice-cold filter  
428 paper, snap-frozen, and stored at  $-80^{\circ}\text{C}$  until analyzed with liquid scintillation counting.

429

### 430 **Serum insulin, glucose, and cortisol quantification**

431 Blood was collected from facial vein either before anesthesia or at the 30-minute time point of  
432 the glucose tolerance test. Blood was then placed at room temperature for 20 minutes to clot  
433 prior to centrifugation at 2000 x g for 10 minutes at  $4^{\circ}\text{C}$ . The supernatant (serum) was collected,  
434 placed in a new tube, and stored at until  $-80^{\circ}\text{C}$  analysis. Serum insulin levels were quantified  
435 using a Mouse Insulin ELISA kit (Cat# 90080 Crystal Chem, Chicago, Illinois). Serum glucose  
436 was quantified using a Mouse Glucose Assay Kit (Cat# 81692 Crystal Chem, Chicago, Illinois).  
437 Serum cortisol levels were quantified by the DetectX ELISA kit (Cat# K003-H1W Arbor assays,  
438 Chicago, USA).

439

### 440 **High-resolution respirometry and fluorometry**

441 Mitochondrial  $\text{O}_2$  utilization was measured using the Oroboros O2K Oxygraphs. Skeletal muscle  
442 tissues were minced in mitochondria isolation medium (300 mM sucrose, 10 mM HEPES, 1 mM  
443 EGTA) and subsequently homogenized using a Teflon-glass system. Homogenates were then  
444 centrifuged at 800 x g for 10 min, after which the supernatant was taken and centrifuged at  
445 12,000 x g for 10 min. The resulting pellet was carefully resuspended in mitochondria isolation

446 medium. Isolated mitochondria were then added to the oxygraphy chambers containing assay  
447 buffer (MES potassium salt 105 mM, KCl 30 mM,  $\text{KH}_2\text{PO}_4$  10 mM,  $\text{MgCl}_2$  5 mM, BSA 0.5  
448 mg/ml). Respiration was measured in response to the following substrates: 0.5mM malate, 5mM  
449 pyruvate, 5mM glutamate, 10mM succinate, 1.5  $\mu\text{M}$  FCCP, 0.02mM palmitoyl-carnitine, 5mM  
450 carnitine. ATP production was measured fluorometrically using a Horiba Fluoromax 4 (Horiba  
451 Scientific), by enzymatically coupling ATP production to NADPH synthesis as previously  
452 described [57]. Respiration and ATP production were measured in the presence of 2mM ADP,  
453 unless otherwise stated.

454

455 For inhibitor experiments in mitochondria isolated from shSC and shPSD myotubes, the  
456 mitochondrial pyruvate carrier (MPC) inhibitor, UK-5099 (5048170001, Sigma Aldrich), was  
457 used to inhibit MPC activity. To induce a submaximal drop of pyruvate-dependent respiration,  
458 100 nM UK-5099 was used at a submaximal concentration and injected into the oxygraph  
459 chamber following the addition of malate and pyruvate. Respiration was measured in response  
460 to the following substrates: 0.5 mM malate, 5 mM pyruvate, 2 mM ADP, and 1  $\mu\text{M}$  FCCP. To  
461 evaluate whether pyruvate-dependent respiration was compromised in shSC and shPSD  
462 mitochondria, respiration was measured in response to either 5 mM pyruvate or 5 mM methyl  
463 pyruvate (371173, Sigma Aldrich) along with the above substrates.

464

#### 465 **$\text{H}_2\text{O}_2$ measurements**

466 Mitochondrial  $\text{H}_2\text{O}_2$  emission was determined in isolated mitochondria from skeletal muscle and  
467 permeabilized muscle fibers. All  $\text{H}_2\text{O}_2$  experiments were performed in buffer Z supplemented  
468 with 10 mM Amplex UltraRed (Invitrogen), 20 U/mL CuZn SOD, and 25 mM Blebbistatin (for  
469 permeabilized muscle fibers only). Briefly, isolated mitochondria or permeabilized fibers were  
470 added to 1 ml of assay buffer containing Amplex Ultra Red, which produces a fluorescent  
471 product when oxidized by  $\text{H}_2\text{O}_2$ .  $\text{H}_2\text{O}_2$  emission was measured following the addition of 10mM

472 succinate or 5 mM pyruvate for a final concentration. The appearance of the fluorescent product  
473 was measured by a Horiba Fluoromax 4 fluorometer (excitation/emission 565/600).

474

#### 475 **Seahorse assay**

476 Extracellular acidification rate (ECAR) was measured in C2C12 myoblasts using a Seahorse  
477 XF96 Analyzer. Myoblasts were plated at  $5 \times 10^4$  cells/well and grown in lentiviral media for 48  
478 hours. C2C12 cells were selected with puromycin throughout differentiation for 3 days. The real-  
479 time extracellular acidification rate (ECAR) was measured using the XFe96 extracellular flux  
480 analyzer with the Glycolysis Stress Kit (Agilent Technologies) following the manufacturer's  
481 instructions. The measurement was normalized to total protein determined by Pierce BCA  
482 Protein Assay Kit (ThermoFisher). Briefly, cells were seeded on XF96 cell culture microplates  
483 (Seahorse Bioscience) at a seeding density of  $5.0 \times 10^3$  cells per well. Before assay, cells were  
484 rinsed twice and kept in pre-warmed XF basic assay medium (pH 7.4) supplemented with 2 mM  
485 glutamine in a 37°C non-CO<sub>2</sub> incubator for an hour. Then the rate was measured at 37°C in 14  
486 replicates (separate wells) by using the following compounds in succession: 10 mM glucose, 1  
487 μM oligomycin, and 50 mM 2-DG. Basal ECAR was measured before drug exposure. The  
488 glycolytic function metrics was calculated by Seahorse Wave Desktop Software as directed in  
489 the glycolysis stress kit manual (Agilent Technologies).

490

#### 491 **Glutathione Redox**

492 Skeletal muscle GSH and GSSG was measured using the fluorometric GSH/GSSG Ratio  
493 Detection Assay Kit II (Abcam 205811). Briefly, whole muscle was homogenized in lysis buffer,  
494 deproteinized using the Deproteinizing Sample Kit – TCA (Abcam 204708), nutated at 4°C for 1  
495 hour, and centrifuged at 4°C for 15 min at 12,000g. The supernatant was collected and protein  
496 concentrations were determined using the Pierce BCA Protein Assay (Thermo Fischer)

497 Scientific). Supernatant was then used to determine GSH and total glutathione. Fluorescence  
498 was measured at Ex/Em = 490/520nm with a fluorescence microplate reader.

499

#### 500 **Cell culture**

501 C2C12 myoblasts were grown in high-glucose DMEM (4.5 g/L glucose, with L-glutamine; Gibco  
502 11965-092) supplemented with 10% FBS (heat-inactivated, certified, US origin; Gibco 10082-  
503 147), and 0.1% penicillin-streptomycin (10,000 U/mL; Gibco 15140122). C2C12 cells were  
504 differentiated into myotubes with low-glucose DMEM (1 g/L glucose with 4mM L-glutamine and  
505 110 mg/L sodium pyruvate; Gibco 11885-084) supplemented with 2% horse serum (defined;  
506 VWR 16777), and 0.1% penicillin-streptomycin.

507

#### 508 **Lentivirus-mediated knockdown of PSD**

509 PSD expression was decreased using pLKO.1 lentiviral-RNAi system. Plasmids encoding  
510 shRNA for mouse PISD (shPSD: TRCN0000115415) was obtained from MilliporeSigma.  
511 Packaging vector psPAX2 (ID 12260), envelope vector pMD2.G (ID 12259), and scrambled  
512 shRNA plasmid (SC: ID 1864) were obtained from Addgene. HEK293T cells in 10 cm dishes  
513 were transfected using 50  $\mu$ L 0.1% polyethylenimine, 200  $\mu$ L, 0.15 M sodium chloride, and 500  
514  $\mu$ L Opti-MEM (with HEPES, 2.4 g/L sodium bicarbonate, and L-glutamine; Gibco 31985) with  
515 2.66  $\mu$ g of psPAX2, 0.75  $\mu$ g of pMD2.G, and 3  $\mu$ g of either scrambled or PISD shRNA plasmid.  
516 Cells were selected with puromycin throughout differentiation to ensure that only cells infected  
517 with shRNA vectors were viable.

518

#### 519 **U-<sup>13</sup>C glucose labeling in cultured myotubes**

520 For metabolite extraction, cold 90% methanol (MeOH) solution was added to each sample to  
521 give a final concentration of 80% MeOH to each cell pellet. Samples were then incubated at -20  
522 °C for 1 hr. After incubation, samples were centrifuged at 20,000 x g for 10 minutes at 4 °C. The

523 supernatant was then transferred from each sample tube into a labeled, fresh micro centrifuge  
524 tube. Process blanks were made using only extraction solvent and no cell culture. The samples  
525 were then dried *en vacuo*.

526  
527 All GC-MS analysis was performed with an Agilent 5977b HES fit with an Agilent 7693A  
528 automatic liquid sampler. Dried samples were suspended in 40  $\mu$ L of a 40 mg/mL O-  
529 methoxylamine hydrochloride (MOX) (MP Bio #155405) in dry pyridine (EMD Millipore  
530 #PX2012-7) and incubated for one hour at 37 °C in a sand bath. 25  $\mu$ L of this solution was  
531 added to auto sampler vials. 60  $\mu$ L of N-methyl-N-trimethylsilyltrifluoroacetamide (MSTFA with  
532 1%TMCS, ThermoFisher Scientific #TS48913) was added automatically via the auto sampler  
533 and incubated for 30 minutes at 37 °C. After incubation, samples were vortexed and 1  $\mu$ L of the  
534 prepared sample was injected into the gas chromatograph inlet in the split mode with the inlet  
535 temperature held at 250 °C. A 10:1 split ratio was used for analysis for the majority of  
536 metabolites. Any metabolites that saturated the instrument at the 10:1 split were analyzed at a  
537 50:1 split ratio. The gas chromatograph had an initial temperature of 60 °C for one minute  
538 followed by a 10 °C/min ramp to 325 °C and a hold time of 10 minutes. A 30-meter Agilent  
539 Zorbax DB-5MS with 10 m Duraguard capillary column was employed for chromatographic  
540 separation. Helium was used as the carrier gas at a rate of 1 mL/min.

541  
542 Data was collected using the Agilent MassHunter software. Metabolites were identified and their  
543 peak area was recorded using MassHunter Quant. Metabolite identity was established using a  
544 combination of an in-house metabolite library developed using pure purchased standards and  
545 the NIST and Fiehn libraries. There are a few reasons a specific metabolite may not be  
546 observable through GC-MS. The metabolite may not be amenable to GC-MS due to its size, or  
547 a quaternary amine such as carnitine, or simply because it does not ionize well.

548

## 549 **Lipid Extraction**

550 LC-MS-grade solvents and mobile phase modifiers were obtained from Honeywell Burdick &  
551 Jackson, Morristown, NJ (acetonitrile, isopropanol, formic acid), Fisher Scientific, Waltham, MA  
552 (methyl *tert*-butyl ether) and Sigma–Aldrich/Fluka, St. Louis, MO (ammonium formate,  
553 ammonium acetate). Lipid standards were obtained from Avanti Polar Lipids, Alabaster, AL.  
554 Lipids were extracted from mitochondria using a modified Matyash lipid extraction [58] using a  
555 biphasic solvent system of cold methanol, methyl *tert*-butyl ether (MTBE), and water. Briefly, a  
556 mixture of cold MTBE, methanol, and internal standards (Mouse SPLASH LIPIDOMIX Avanti  
557 Polar Lipids 330707 and Cardiolipin Mix I Avanti Polar Lipids LM6003) were added to isolated  
558 skeletal muscle mitochondria isolated mitochondria from C2C12 myotubes or plantaris skeletal  
559 muscle. Samples were sonicated for 60 sec, then incubated on ice with occasional vortexing for  
560 1 hr. After addition of 188  $\mu$ L of PBS, the mixture was incubated on ice for 15 min and  
561 centrifuged at 12,000 x *g* for 10 minutes at 4 °C. The organic (upper) layer was collected, and  
562 the aqueous layer was re-extracted with 1 mL of 10:3:2.5 (*v/v/v*) MTBE/MeOH/water. The MTBE  
563 layers were combined for untargeted lipidomic analysis and dried under vacuum. The aqueous  
564 layer was centrifuged for 12,000 x *g* for 10 minutes at 4 °C and dried under vacuum. Lipid  
565 extracts were reconstituted in 500  $\mu$ L of 8:2:2 (*v/v/v*) IPA/ACN/water containing 10 mM  
566 ammonium formate and 0.1% formic acid. Concurrently, a process blank sample was prepared  
567 and then a pooled quality control (QC) sample was prepared by taking equal volumes (~50  $\mu$ L)  
568 from each sample after final resuspension.

569

## 570 **LC-MS Analysis and Data Processing**

571 Lipid extracts were separated on an Acquity UPLC CSH C18 column (2.1 x 100 mm; 1.7  $\mu$ m)  
572 coupled to an Acquity UPLC CSH C18 VanGuard precolumn (5 x 2.1 mm; 1.7  $\mu$ m) (Waters,  
573 Milford, MA) maintained at 65 °C connected to an Agilent HiP 1290 Sampler, Agilent 1290  
574 Infinity pump, and Agilent 6545 Accurate Mass Q-TOF dual AJS-ESI mass spectrometer

575 (Agilent Technologies, Santa Clara, CA). Samples were analyzed in a randomized order in both  
576 positive and negative ionization modes in separate experiments acquiring with the scan range  
577  $m/z$  100 – 1700. Mobile phase A consisted of ACN:H<sub>2</sub>O (60:40, v/v) in 10 mM ammonium  
578 formate and 0.1% formic acid, and mobile phase B consisted of IPA:ACN:H<sub>2</sub>O (90:9:1, v/v/v) in  
579 10 mM ammonium formate and 0.1% formic acid. For negative mode analysis the modifiers  
580 were changed to 10 mM ammonium acetate. The chromatography gradient for both positive and  
581 negative modes started at 15% mobile phase B then increased to 30% B over 2.4 min, it then  
582 increased to 48% B from 2.4 – 3.0 min, then increased to 82% B from 3 – 13.2 min, then  
583 increased to 99% B from 13.2 – 13.8 min where it's held until 16.7 min and then returned to the  
584 initial conditions and equilibrated for 5 min. Flow was 0.4 mL/min throughout, with injection  
585 volumes of 2  $\mu$ L for positive and 10  $\mu$ L negative mode. Tandem mass spectrometry was  
586 conducted using iterative exclusion, the same LC gradient at collision energies of 20 V and 27.5  
587 V in positive and negative modes, respectively. For data processing, Agilent MassHunter (MH)  
588 Workstation and software packages MH Qualitative and MH Quantitative were used. The  
589 pooled QC (n=8) and process blank (n=4) were injected throughout the sample queue to ensure  
590 the reliability of acquired lipidomics data. For lipid annotation, accurate mass and MS/MS  
591 matching was used with the Agilent Lipid Annotator library and LipidMatch [59]. Results from the  
592 positive and negative ionization modes from Lipid Annotator were merged based on the class of  
593 lipid identified. Data exported from MH Quantitative was evaluated using Excel where initial lipid  
594 targets are parsed based on the following criteria. Only lipids with relative standard deviations  
595 (RSD) less than 30% in QC samples are used for data analysis. Additionally, only lipids with  
596 background AUC counts in process blanks that are less than 30% of QC are used for data  
597 analysis. The parsed excel data tables are normalized based on the ratio to class-specific  
598 internal standards, then to tissue mass and sum prior to statistical analysis.

599

600 **Western blotting**



601 Tissues or cells were homogenized in lysis buffer, nutated at 4°C for 1 hour, and centrifuged at  
602 4°C for 15 min at 12,000g, and the supernatant was transferred to a new tube. Western blotting  
603 was performed as previously described [60], and samples were analyzed for protein abundance  
604 of OXPHOS (ab110413, Abcam), 4-HNE (ab46545, Abcam), MPC1 (generated by Jared  
605 Rutter), MPC2 (generated by Jared Rutter), PDH (3205S, Cell Signaling), LDHA (3582S, Cell  
606 Signaling ), LDHB (sc-100775, SantaCruz Biotech), and Actin (A2066, Sigma-Aldrich).

607

### 608 **RNA quantification**

609 For quantitative polymerase chain reaction (qPCR) experiments, mouse tissues or cells were  
610 lysed in the TRIzol reagent (Thermo Fisher Scientific), and RNA was isolated using standard  
611 techniques. The iScript cDNA Synthesis Kit was used to reverse transcribe total RNA,  
612 and qPCR was performed with SYBR Green reagents (Thermo Fisher Scientific). Pre-validated  
613 primer sequences were obtained from mouse primer depot  
614 (<https://mouseprimerdepot.nci.nih.gov/>). All mRNA levels were normalized to RPL32. For RNA  
615 sequencing, gastrocnemius muscle RNA from Sham and SMC mice were isolated with the  
616 Direct-zol RNA Miniprep Plus kit (Zymo Cat#: R2070). RNA library construction and sequencing  
617 were performed by the High-Throughput Genomics Core at the Huntsman Cancer Institute,  
618 University of Utah. RNA libraries were constructed using the NEBNext Ultra II Directional RNA  
619 Library Prep with rRNA Depletion Kit (human, mouse rat) and the following adapter reads: Read  
620 1: AGATCGGAAGAGCACACGTCTGAACTCCAGTCA and Read 2:  
621 AGATCGGAAGAGCGTCGTGTAGGGAAAGAGTGT. Sequencing was performed using the  
622 NovaSeq S4 Reagent Kit v1.5 150x150 bp Sequencing with >25 million reads per sample.  
623 Pathway analyses were performed by the Bioinformatics Core at the Huntsman Cancer Institute,  
624 University of Utah using the KEGG (Kyoto Encyclopedia of Genes and Genomes) Pathway

625 Database. For differentially expressed genes, only transcripts with *P*adj < 0.05 and baseMean >  
626 100 are included.

627

### 628 **DNA isolation and quantitative PCR**

629 Genomic DNA for assessments of mitochondrial DNA (mtDNA) was isolated using a  
630 commercially available kit according to the manufacturer's instructions (69504, Qiagen).

631 Genomic DNA was added to a mixture of SYBR Green (Thermo Fisher Scientific) and primers.

632 Sample mixtures were pipetted onto a 3840well plate and analyzed with QuantStudio 12K Flex

633 (Life Technologies). The following primers were used: mtDNA fwd, TTAAGA-CAC-CTT-GCC-

634 TAG-CCACAC; mtDNA rev, CGG-TGG-CTG-GCA-CGA-AAT-T; nucDNA fwd, ATGACG-

635 ATA-TCG-CTG-CGC-TG; nucDNA rev, TCA-CTT-ACC-TGGTGCCTA-GGG-C.

636

### 637 **Statistical analyses**

638 All data presented herein are expressed as mean  $\pm$  SEM. The level of significance was set at *p*

639 < 0.05. Student's *t*-tests were used to determine the significance between experimental groups

640 and two-way ANOVA analysis followed by Tukey's HSD post hoc test was used where

641 appropriate. The sample size (*n*) for each experiment is shown in the figure legends and

642 corresponds to the sample derived from the individual mice or for cell culture experiments on an

643 individual batch of cells. Unless otherwise stated, statistical analyses were performed using

644 GraphPad Prism software.

645

646 **Acknowledgements**

647 This research is supported by National Institutes of Health grants DK107397, DK127979,  
648 GM144613, AG074535, AG067186 (to K.F.), DK091317 (to M.J.L.), DK104998 (to E.B.T.),  
649 AG076075, AG079477, AG050781 (to M.J.D.), GM131854, CA228346 (to J.R.), Howard  
650 Hughes Medical Institute (J.R.), and American Heart Association grant 915674 (to P.S.).  
651 University of Utah Metabolomics Core Facility is supported by S10 OD016232, S10 OD021505,  
652 and U54 DK110858.

653

654 **Author contributions**

655 Piyarat Siripoksup, Conceptualization, Data curation, Formal analysis, Validation, Investigation,  
656 Visualization, Methodology, Writing – original draft, Writing – review and editing, Funding  
657 acquisition; Guoshen Cao, Conceptualization, Investigation, Data curation, Methodology;  
658 Ahmad A Cluntun, Conceptualization, Data curation, Formal analysis, Methodology; J Alan  
659 Maschek, Data curation, Formal analysis, Resources; Quentinn Pearce, Data curation, Formal  
660 analysis, Resources; Marisa J Lang, Data curation; Hiroaki Eshima, Data curation; Precious C  
661 Oporum, Data curation; Ziad S Mahmassani, Conceptualization, Methodology; Eric B Taylor,  
662 Methodology; James E Cox, Methodology, Resources, Supervision; Micah J Drummond,  
663 Conceptualization, Methodology, Resources, Supervision; Jared Rutter, Conceptualization,  
664 Resources; Katsuhiko Funai, Conceptualization, Formal analysis, Validation, Visualization,  
665 Supervision, Writing – review and editing, Resources, Funding acquisition, Project  
666 administration.

667

668 **Author ORCIDs**

669 Piyarat Siripoksup <https://orcid.org/0000-0003-4290-6225>

670 Ahmad A Cluntun <https://orcid.org/0000-0001-7612-8375>

671 Ziad Mahmassani <https://orcid.org/0000-0002-3391-6184>

672 Eric B Taylor <https://orcid.org/0000-0003-4549-6567>

673 James E Cox <https://orcid.org/0000-0002-5977-2350>

674 Micah J Drummond <https://orcid.org/0000-0001-5961-8890>

675 Jared Rutter <https://orcid.org/0000-0002-2710-9765>

676 Katsuhiko Funai <https://orcid.org/0000-0003-3802-4756>

677

678 **Ethics**

679 Experiments on animals were performed in strict accordance with the Guide for the Care and  
680 Use of Laboratory Animals of the National Institutes of Health. All animals were handled  
681 according to approved University of Utah Animal Use and Care Committee (IACUC) protocols  
682 (#20-07007). The protocol as approved by the Committee on the Ethics of Animal Experiments  
683 of the University of Utah.

684 **Figure legends**

685 **Figure 1 | SMC housing induces metabolic inflexibility in male but not female mice.** (A)

686 Small mouse cage schematic. (B) Activity counts of sham and SMC mice via indirect calorimetry  
687 (n = 8 per group). (C) Body mass time course (n= 6-14 per group). (D) Skeletal muscle tissue  
688 mass (N = 7-8 per group). (E) Adipose mass of sham and SMC mice (n = 7-19 per group). (F)  
689 Absolute VO<sub>2</sub> of male sham and SMC mice via indirect calorimetry (n = 8-9 per group). (G)  
690 Absolute VO<sub>2</sub> of female sham and SMC mice via indirect calorimetry (n = 3-4 per group). (H)  
691 Respiratory exchange ratio [28] of male sham and SMC mice (n = 8-9 per group). (I) RER of  
692 female sham and SMC mice (n = 3-4 per group). (J) Fasting serum glucose levels of sham and  
693 SMC mice (n = 4-8 per group). (K) [<sup>3</sup>H]2-deoxyglucose glucose uptake in soleus muscles of  
694 male and female sham and SMC mice (n = 4-9 per group). Data represent mean ± SEM. P-  
695 values generated by two-tailed, equal variance, Student's t-test (D and J), or by 2-way ANOVA  
696 with Tukey's post hoc test (B-C, E-I, and J).

697

698 **Figure 2 | SMC housing reduces pyruvate-dependent respiration without altering**

699 **palmitate-stimulated respiration.** (A) Dot plot representing GSEA pathway analysis (KEGG) of  
700 differentially expressing genes (FDR < 0.05) in skeletal muscle of sham and SMC mice.  
701 Normalized enrichment scores are represented by a darker color (negatively enriched) and  
702 lighter color (positively enriched), while a larger dot diameter indicates a smaller p-adjusted  
703 value. Dot plot was generated with R Studio. (B) Representative western blot of ETS protein  
704 complexes (I-V) of whole muscle tissue of sham and SMC mice (n = 3-4 per group). (B) Ratio of  
705 nuclear to mitochondrial DNA in gastrocnemius muscle (n = 8 per group). (D) O<sub>2</sub> utilization in  
706 isolated mitochondria measured in the presence of 2 mM ADP, 0.5 mM malate, 5 mM pyruvate,  
707 10 mM succinate, 1 μM carbonyl cyanide-*p*-trifluoromethoxyphenylhydrazone (FCCP) of sham  
708 and SMC mice (n = 4-6 per group). (E) O<sub>2</sub> utilization in isolated mitochondria measured in the  
709 presence of 2 mM ADP, 0.5 mM malate, 0.02 mM palmitoyl-carnitine (n = 4-6 per group). (F)

710 Representative western blot of ETS proteins in isolated muscle mitochondria of sham and SMC  
711 mice (n = 5-6 per group). (G) Glutathione levels in skeletal muscle of sham and SMC mice (n =  
712 6 per group). (H) Electron leak ( $J_{H_2O_2}/O_2$ ) with succinate in isolated muscle mitochondria from  
713 sham and SMC mice (n = 3-4 per group). Data represent mean  $\pm$  SEM. P-values generated by  
714 2-way ANOVA with Tukey's post hoc test (C-E, G, and H).

715

716 **Figure 3 | Physical inactivity by SMC housing alters skeletal muscle membrane lipid**  
717 **composition.** (A) Heat map of glycolytic genes in sham and SMC mice (n = 6 per group). (B)  
718 Heat map of TCA cycle genes in sham and SMC mice (n = 6 per group). (C) Representative  
719 western blots of glycolytic/TCA genes in sham and SMC mice (n = 2-6 per group). (D) Top 20  
720 differentially regulated skeletal muscle mitochondrial lipids between SMC and sham mice (n = 7-  
721 8 per group). The red box highlights the lipids whose change in abundances are unique to male  
722 mice. (E) Skeletal muscle mitochondrial PE species of sham and SMC mice (n = 8 per group).  
723 (F) Skeletal muscle PSD mRNA levels of sham and SMC mice (n = 7-8 per group). Data  
724 represent mean  $\pm$  SEM. P-values generated by two-tailed, equal variance, Student's t-test (F),  
725 or by 2-way ANOVA with Tukey's post hoc test (A-B and D-E).

726

727 **Figure 4 | Muscle PSD haploinsufficiency increases susceptibility of mice to inactivity-**  
728 **induced metabolic inflexibility.** (A) Mouse breeding schematic. (B) PSD mRNA levels of sham  
729 Cre control and PSD-Mhet mice (n = 11-12 per group). (C) Muscle mitochondrial PE levels in  
730 sham control and PSD-Mhet mice (n = 5 per group). (D) Body mass of SMC Control and SMC  
731 PSD-Mhet mice after 8 weeks of reduced activity (n = 8-12 per group). Skeletal muscle (E) and  
732 adipose masses (F) after SMC intervention (n = 8-12 per group). (G) Absolute  $VO_2$  via indirect  
733 calorimetry (n = 3-6 per group). (H) RER (n = 8-11 per group). (I) Serum glucose levels (n = 8  
734 per group). (J) Glucose tolerance test (GTT) performed around Week 7 of SMC intervention (n =  
735 8-13 per group). (K) Serum insulin levels taken at the 30-minute time point during the GTT (n =

736 6 per group). (I) [<sup>3</sup>H]2-deoxyglucose glucose uptake in soleus muscles after 8 weeks of SMC (n  
737 = 7-9 per group). Data represent mean ± SEM. \*P < 0.05. \*\*P < 0.01, \*\*\*P < 0.001, and \*\*\*\*P <  
738 0.0001. P-values generated by two-tailed, equal variance, Student's t-test (B, D, I, and K), or by  
739 2-way ANOVA with Tukey's post hoc test (C, E-H, J, and L).

740

741 **Figure 5 | Diminished mitochondrial pyruvate respiration by PSD haploinsufficiency is**  
742 **not mediated by oxidative stress.** (A) Representative western blot of ETS protein complexes  
743 (I-V) of whole muscle tissue of SMC Control and SMC PSD-MHet mice (n = 4-7 per group). (B)  
744 Nuclear to mitochondrial DNA in gastrocnemius muscles (n = 8 per group). (C) O<sub>2</sub> utilization in  
745 isolated muscle mitochondria with TCA cycle substrates using the same conditions described  
746 earlier (n = 6 per group). (D) O<sub>2</sub> utilization in isolated muscle mitochondria with fatty acid  
747 substrates using the same conditions described earlier (n = 6-7 per group). (E) Representative  
748 western blot of ETS protein complexes (I-V) of isolated muscle mitochondria of SMC Control  
749 and SMC PSD-Mhet mice (n = 5 per group). (F) Skeletal muscle glutathione levels (n = 8 per  
750 group). (G) Representative 4-HNE western blot of whole muscle of SMC Control and SMC PSD-  
751 Mhet mice (n = 6 per group). (H) Electron leak in isolated muscle mitochondria stimulated with  
752 succinate or pyruvate and auranofin (n = 6 per group). Data represent mean ± SEM. P-values  
753 generated by two-tailed, equal variance, Student's t-test (B), or by 2-way ANOVA with Tukey's  
754 post hoc test (C-D, F, and H).

755

756 **Figure 6 | Mitochondrial PE deficiency impairs pyruvate metabolism.** (A) PSD mRNA  
757 abundance in shSC and shPSD knockdown C2C12 myotubes (n = 9 per group). (B) PE levels  
758 from isolated mitochondria from shSC and shPSD cells (n = 9-10 per group). (C) O<sub>2</sub>  
759 consumption with TCA cycle substrates using the same conditions described earlier (n = 7 per  
760 group). (D) ATP production in isolated mitochondria from shSc and shPSD myotubes measured  
761 in the presence of 0.5 mM malate, 5 mM pyruvate, 5 mM glutamate, 10 mM succinate and

762 either 2, 200, or 2000  $\mu\text{M}$  ADP ( $n = 7-10$  per group). (E)  $\text{O}_2$  consumption with fatty acid  
763 substrates using the same conditions described earlier ( $n = 5-6$  per group). (F) Representative  
764 western blot of ETS protein complexes I-V in isolated mitochondria from shSC and shPSD cells  
765 ( $n = 5-6$  per group). (G) Representative image of media color from cell culture plates. (H)  
766 Quantification of lactate production in the media after 24 hours ( $n = 7-12$  per group). (I)  
767 Seahorse extracellular acidification rate (ECAR) ( $n = 14$  replicates per group). Data represent  
768 mean  $\pm$  SEM. P-values generated by two-tailed, equal variance, Student's t-test (A and H), or by  
769 2-way ANOVA with Tukey's post hoc test (B-E and I).

770

771 **Figure 7 | PSD knockdown increases lactate flux.** (A) Atom mapping for [ $\text{U-}^{13}\text{C}_6$ ]-glucose  
772 tracing incorporation into glycolytic and TCA cycle intermediates. White circles represent  $^{12}\text{C}$   
773 atoms, while black circles signify  $^{13}\text{C}$  atoms. Isotope labeling pattern between shSC and shPSD  
774 myotubes for intracellular (B) 3-phosphoglycerate, (C) pyruvate, (D) lactate, (E) (iso)citrate, (F)  
775 succinate, (G) fumarate, and (H) malate ( $n = 4-5$  per group). Data represent mean  $\pm$  SEM. P-  
776 values generated by 2-way ANOVA with Tukey's post hoc test (B-I).

777

778 **Figure 8 | Mitochondrial PE facilitates pyruvate entry.** (A) Representative western blot of  
779 MPC1, MPC2, PDH, LDHA, LDHB, and Actin between shSC and shPSD myotubes ( $n = 6$  per  
780 group). (B) Pyruvate-dependent  $\text{O}_2$  consumption in isolated mitochondria from shSc and  
781 shPSDKD myotubes in the presence or absence of the MPC inhibitor, UK-5099 (100nm) and  
782 the same Krebs cycle substrate conditions described above ( $n = 6-8$  per group). (C) Pyruvate-  
783 dependent respiration in isolated mitochondria with Krebs cycle substrate conditions described  
784 above with either pyruvate or methyl pyruvate as a substrate ( $n = 6-8$  per group). Data  
785 represent mean  $\pm$  SEM. P-values generated by 2-way ANOVA with Tukey's post hoc test (B-C).

786



787 **Figure 1 – Figure Supplement 1. SMC housing induces metabolic inflexibility in male but**  
788 **not female mice.** (A) [<sup>3</sup>H]2-deoxyglucose glucose uptake in soleus muscles of sham and  
789 hindlimb unloading (HU) mice (n = 2 per group). (B) Lean mass pre- and post-intervention by  
790 NMR (n = 12-15 per group). (C) Fat mass pre- and post-intervention by NMR (n = 4-8 per  
791 group). (D) Food consumption (n = 18-28 per group). (E) Fasting serum cortisol levels (n = 6-7  
792 per group). Data represent mean ± SEM. P-values generated by two-tailed, equal variance,  
793 Student's t-test (B, D, E), or by 2-way ANOVA with Tukey's post hoc test (A, C).

794

795 **Figure 2 – Figure Supplement 1. SMC housing reduces pyruvate-dependent respiration**  
796 **without altering palmitate-stimulated respiration.** (A) Skeletal muscle ETS protein  
797 quantification (n = 3-4 per group). (B) Isolated muscle mitochondria ETS protein quantification  
798 (n = 5-6 per group). (C) Representative 4-hydroxynonenal (4-HNE) western blot of whole  
799 muscle tissue of sham and SMC mice (n = 5-7 per group). (D) 4-HNE protein quantification (n =  
800 5-7 per group). Data represent mean ± SEM. P-values generated by 2-way ANOVA with  
801 Tukey's post hoc test (A-B and D).

802

803 **Figure 3 – Figure Supplement 1. Physical inactivity by SMC housing alters skeletal**  
804 **muscle membrane lipid composition.** (A) Western blot quantification of glycolytic/TCA protein  
805 abundances in sham and SMC mice (n = 2-6 per group). (B) Total mitochondrial and (E)  
806 skeletal muscle lipids between male sham and SMC mice (n = 7-8 per group) and female sham  
807 and SMC mice (n = 5 per group). Volcano plot showing changes in muscle mitochondrial lipids  
808 between male (C) and female (D) sham and SMC mice (n = 8 per group). (F) Skeletal muscle  
809 PE abundance of male sham and SMC mice (n = 7-8 per group). Data represent mean ± SEM.  
810 P-values generated by 2-way ANOVA with Tukey's post hoc test (A-B and E-F).

811

812 **Figure 4 – Figure Supplement 1. Muscle PSD haploinsufficiency increases susceptibility**

813 **of mice to inactivity-induced metabolic inflexibility.** (A) Average food intake per day  
814 throughout SMC intervention (n = 10 per group). (B) Serum cortisol levels after SMC  
815 intervention (n = 8 per group). (C) Lean and fat mass by NMR of SMC Control and SMC PSD-  
816 Mhet mice pre- and post-intervention (n = 8-12 per group). Data represent mean  $\pm$  SEM. P-  
817 values generated by two-tailed, equal variance, Student's t-test (A-B), or by 2-way ANOVA with  
818 Tukey's post hoc test (C).

819

820 **Figure 5 – Figure Supplement 1. Diminished mitochondrial pyruvate respiration by PSD**

821 **haploinsufficiency is not mediated by oxidative stress.** (A) Whole tissue ETS protein  
822 quantification (n = 4-7 per group). (B) Mitochondrial ETS protein quantification (n = 5 per group).  
823 (C) 4-HNE protein quantification (n = 6 per group). Data represent mean  $\pm$  SEM. P-values  
824 generated by 2-way ANOVA with Tukey's post hoc test (A-C).

825

826 **Figure 6 – Figure Supplement 1. Mitochondrial PE deficiency impairs pyruvate**

827 **metabolism.** (A) Representative western blot of whole cell OXPHOS complexes between shSC  
828 and shPSD cells (n = 3-4 per group). (B) Mitochondrial ETS protein quantification (n = 5-6 per  
829 group). (C) Quantification of (A) (n = 3-4 per group). (D) H<sub>2</sub>O<sub>2</sub> emission in isolated mitochondria  
830 from shSC and shPSD myotubes stimulated with succinate or pyruvate and auranofin (n = 4-10  
831 per group). (E) Representative western blot of whole cell 4-HNE (n = 6 per group). (F)  
832 Quantification of (E) (n = 6 per group). Data represent mean  $\pm$  SEM. P-values generated by two-  
833 tailed, equal variance, Student's t-test (F) or by 2-way ANOVA with Tukey's post hoc test (B-D).

834

835 **Figure 7 – Figure Supplement 1. PSD knockdown increases lactate flux.** Isotopic labeling

836 pattern in shSC and shPSD myotubes of (A) glycine, (B) alanine, (C) glutamate (n = 4-5 per

837 group). Data represent mean  $\pm$  SEM. P-values generated by 2-way ANOVA with Tukey's post  
838 hoc test (A-C).

839

840 **Figure 8 – Figure Supplement 1. Mitochondrial PE facilitates pyruvate entry.** (A) Western

841 blot quantification of MPC1, MPC2, PDH, LDHA, LDHB, and Actin protein abundances (n = 4-6

842 per group). (B) Relative mRNA abundances of genes encoding for proteins in (A) (n = 6 per

843 group). Data represent mean  $\pm$  SEM. by two-tailed, equal variance, Student's t-test (A-B)

844

## 845 References

- 846 1. Lee, I.M., et al., *Effect of physical inactivity on major non-communicable diseases*  
847 *worldwide: an analysis of burden of disease and life expectancy*. The Lancet, 2012.  
848 **380**(9838): p. 219-229.
- 849 2. Ding, D., et al., *The economic burden of physical inactivity: a global analysis of major*  
850 *non-communicable diseases*. The Lancet, 2016. **388**(10051): p. 1311-1324.
- 851 3. Booth, F.W., et al., *Waging war on physical inactivity: using modern molecular*  
852 *ammunition against an ancient enemy*. J Appl Physiol (1985), 2002. **93**(1): p. 3-30.
- 853 4. Booth, F.W., et al., *Reduced physical activity and risk of chronic disease: the biology*  
854 *behind the consequences*. Eur J Appl Physiol, 2008. **102**(4): p. 381-90.
- 855 5. Bowden Davies, K.A., et al., *Short-term decreased physical activity with increased*  
856 *sedentary behaviour causes metabolic derangements and altered body composition:*  
857 *effects in individuals with and without a first-degree relative with type 2 diabetes*.  
858 Diabetologia, 2018. **61**(6): p. 1282-1294.
- 859 6. Krogh-Madsen, R., et al., *A 2-wk reduction of ambulatory activity attenuates peripheral*  
860 *insulin sensitivity*. J Appl Physiol (1985), 2010. **108**(5): p. 1034-40.
- 861 7. Dirks, M.L., et al., *One Week of Bed Rest Leads to Substantial Muscle Atrophy and*  
862 *Induces Whole-Body Insulin Resistance in the Absence of Skeletal Muscle Lipid*  
863 *Accumulation*. Diabetes, 2016. **65**(10): p. 2862-75.
- 864 8. Mikines, K.J., et al., *Seven days of bed rest decrease insulin action on glucose uptake in*  
865 *leg and whole body*. J Appl Physiol (1985), 1991. **70**(3): p. 1245-54.
- 866 9. Rynders, C.A., et al., *Sedentary behaviour is a key determinant of metabolic inflexibility*.  
867 J Physiol, 2018. **596**(8): p. 1319-1330.
- 868 10. Bergouignan, A., et al., *Physical inactivity as the culprit of metabolic inflexibility:*  
869 *evidence from bed-rest studies*. J Appl Physiol (1985), 2011. **111**(4): p. 1201-10.
- 870 11. Reidy, P.T., et al., *Preclinical rodent models of physical inactivity-induced muscle insulin*  
871 *resistance: challenges and solutions*. J Appl Physiol (1985), 2021. **130**(3): p. 537-544.
- 872 12. Morey-Holton, E., et al., *The hindlimb unloading rat model: literature overview, technique*  
873 *update and comparison with space flight data*. Adv Space Biol Med, 2005. **10**: p. 7-40.
- 874 13. Marmonti, E., et al., *A Rat Immobilization Model Based on Cage Volume Reduction: A*  
875 *Physiological Model for Bed Rest?* Front Physiol, 2017. **8**: p. 184.
- 876 14. Mahmassani, Z.S., et al., *Absence of MyD88 from Skeletal Muscle Protects Female*  
877 *Mice from Inactivity-Induced Adiposity and Insulin Resistance*. Obesity (Silver Spring),  
878 2020. **28**(4): p. 772-782.
- 879 15. Heden, T.D., et al., *Mitochondrial PE potentiates respiratory enzymes to amplify skeletal*  
880 *muscle aerobic capacity*. Sci Adv, 2019. **5**(9): p. eaax8352.
- 881 16. Shiao, Y.J., B. Balcerzak, and J.E. Vance, *A mitochondrial membrane protein is required*  
882 *for translocation of phosphatidylserine from mitochondria-associated membranes to*  
883 *mitochondria*. Biochem J, 1998. **331 ( Pt 1)**(Pt 1): p. 217-23.
- 884 17. Vance, J.E., *Phospholipid synthesis in a membrane fraction associated with*  
885 *mitochondria*. J Biol Chem, 1990. **265**(13): p. 7248-56.
- 886 18. Kennedy, E.P. and S.B. Weiss, *The function of cytidine coenzymes in the biosynthesis*  
887 *of phospholipides*. J Biol Chem, 1956. **222**(1): p. 193-214.
- 888 19. Vance, J.E. and R. Steenbergen, *Metabolism and functions of phosphatidylserine*. Prog  
889 Lipid Res, 2005. **44**(4): p. 207-34.
- 890 20. Zhao, T., et al., *PISD is a mitochondrial disease gene causing skeletal dysplasia,*  
891 *cataracts, and white matter changes*. Life Sci Alliance, 2019. **2**(2).
- 892 21. Peter, V.G., et al., *The Liberfarb syndrome, a multisystem disorder affecting eye, ear,*  
893 *bone, and brain development, is caused by a founder pathogenic variant in the PISD*  
894 *gene*. Genet Med, 2019. **21**(12): p. 2734-2743.

- 895 22. Girisha, K.M., et al., *The homozygous variant c.797G>A/p.(Cys266Tyr) in PISD is*  
896 *associated with a Spondyloepimetaphyseal dysplasia with large epiphyses and disturbed*  
897 *mitochondrial function.* Hum Mutat, 2019. **40**(3): p. 299-309.
- 898 23. Borkman, M., et al., *The relation between insulin sensitivity and the fatty-acid*  
899 *composition of skeletal-muscle phospholipids.* N Engl J Med, 1993. **328**(4): p. 238-44.
- 900 24. Pan, D.A., et al., *Skeletal muscle membrane lipid composition is related to adiposity and*  
901 *insulin action.* J Clin Invest, 1995. **96**(6): p. 2802-8.
- 902 25. Vessby, B., S. Tengblad, and H. Lithell, *Insulin sensitivity is related to the fatty acid*  
903 *composition of serum lipids and skeletal muscle phospholipids in 70-year-old men.*  
904 *Diabetologia*, 1994. **37**(10): p. 1044-50.
- 905 26. Newsom, S.A., et al., *Skeletal muscle phosphatidylcholine and*  
906 *phosphatidylethanolamine are related to insulin sensitivity and respond to acute exercise*  
907 *in humans.* J Appl Physiol (1985), 2016. **120**(11): p. 1355-63.
- 908 27. Alibegovic, A.C., et al., *Impact of 9 days of bed rest on hepatic and peripheral insulin*  
909 *action, insulin secretion, and whole-body lipolysis in healthy young male offspring of*  
910 *patients with type 2 diabetes.* Diabetes, 2009. **58**(12): p. 2749-56.
- 911 28. Woods, J.A., et al., *The COVID-19 pandemic and physical activity.* Sports Med Health  
912 *Sci*, 2020. **2**(2): p. 55-64.
- 913 29. Virtue, S., P. Even, and A. Vidal-Puig, *Below thermoneutrality, changes in activity do not*  
914 *drive changes in total daily energy expenditure between groups of mice.* Cell Metab,  
915 2012. **16**(5): p. 665-71.
- 916 30. Bodine, S.C., et al., *Akt/mTOR pathway is a crucial regulator of skeletal muscle*  
917 *hypertrophy and can prevent muscle atrophy in vivo.* Nat Cell Biol, 2001. **3**(11): p. 1014-  
918 9.
- 919 31. Kelley, D.E., et al., *Dysfunction of mitochondria in human skeletal muscle in type 2*  
920 *diabetes.* Diabetes, 2002. **51**(10): p. 2944-50.
- 921 32. Holloszy, J.O., *"Deficiency" of mitochondria in muscle does not cause insulin resistance.*  
922 *Diabetes*, 2013. **62**(4): p. 1036-40.
- 923 33. Anderson, E.J., et al., *Mitochondrial H2O2 emission and cellular redox state link excess*  
924 *fat intake to insulin resistance in both rodents and humans.* J Clin Invest, 2009. **119**(3):  
925 p. 573-81.
- 926 34. Eshima, H., et al., *Neutralizing mitochondrial ROS does not rescue muscle atrophy*  
927 *induced by hindlimb unloading in female mice.* J Appl Physiol (1985), 2020. **129**(1): p.  
928 124-132.
- 929 35. Kondo, H., et al., *Mechanism of oxidative stress in skeletal muscle atrophied by*  
930 *immobilization.* Am J Physiol, 1993. **265**(6 Pt 1): p. E839-44.
- 931 36. Dirks, M.L., et al., *Short-term bed rest-induced insulin resistance cannot be explained by*  
932 *increased mitochondrial H2O2 emission.* The Journal of Physiology, 2020. **598**(1): p.  
933 123-137.
- 934 37. Johnson, J.M., et al., *Targeted overexpression of catalase to mitochondria does not*  
935 *prevent cardioskeletal myopathy in Barth syndrome.* J Mol Cell Cardiol, 2018. **121**: p. 94-  
936 102.
- 937 38. Warburg, O., F. Wind, and E. Negelein, *The Metabolism of Tumors in the Body.* J Gen  
938 *Physiol*, 1927. **8**(6): p. 519-30.
- 939 39. Vander Heiden, M.G., L.C. Cantley, and C.B. Thompson, *Understanding the Warburg*  
940 *effect: the metabolic requirements of cell proliferation.* Science, 2009. **324**(5930): p.  
941 1029-33.
- 942 40. Bricker, D.K., et al., *A mitochondrial pyruvate carrier required for pyruvate uptake in*  
943 *yeast, Drosophila, and humans.* Science, 2012. **337**(6090): p. 96-100.
- 944 41. Herzig, S., et al., *Identification and functional expression of the mitochondrial pyruvate*  
945 *carrier.* Science, 2012. **337**(6090): p. 93-6.

- 946 42. Hildyard, J.C., et al., *Identification and characterisation of a new class of highly specific*  
947 *and potent inhibitors of the mitochondrial pyruvate carrier*. *Biochim Biophys Acta*, 2005.  
948 **1707**(2-3): p. 221-30.
- 949 43. Divakaruni, A.S., G.W. Rogers, and A.N. Murphy, *Measuring Mitochondrial Function in*  
950 *Permeabilized Cells Using the Seahorse XF Analyzer or a Clark-Type Oxygen*  
951 *Electrode*. *Curr Protoc Toxicol*, 2014. **60**: p. 25 2 1-16.
- 952 44. Booth, F.W., C.K. Roberts, and M.J. Laye, *Lack of exercise is a major cause of chronic*  
953 *diseases*. *Compr Physiol*, 2012. **2**(2): p. 1143-211.
- 954 45. Arikkeeth, D., R. Nelson, and J.E. Vance, *Defining the importance of phosphatidylserine*  
955 *synthase-1 (PSS1): unexpected viability of PSS1-deficient mice*. *J Biol Chem*, 2008.  
956 **283**(19): p. 12888-97.
- 957 46. Bergo, M.O., et al., *Defining the importance of phosphatidylserine synthase 2 in mice*. *J*  
958 *Biol Chem*, 2002. **277**(49): p. 47701-8.
- 959 47. Miyata, N., et al., *Phosphatidylserine transport by Ups2-Mdm35 in respiration-active*  
960 *mitochondria*. *J Cell Biol*, 2016. **214**(1): p. 77-88.
- 961 48. Selathurai, A., et al., *The CDP-Ethanolamine Pathway Regulates Skeletal Muscle*  
962 *Diacylglycerol Content and Mitochondrial Biogenesis without Altering Insulin Sensitivity*.  
963 *Cell Metab*, 2015. **21**(5): p. 718-30.
- 964 49. Funai, K., et al., *Skeletal Muscle Phospholipid Metabolism Regulates Insulin Sensitivity*  
965 *and Contractile Function*. *Diabetes*, 2016. **65**(2): p. 358-370.
- 966 50. Calzada, E., et al., *Phosphatidylethanolamine made in the inner mitochondrial*  
967 *membrane is essential for yeast cytochrome bc1 complex function*. *Nat Commun*, 2019.  
968 **10**(1): p. 1432.
- 969 51. Lee, K., J. Kerner, and C.L. Hoppel, *Mitochondrial carnitine palmitoyltransferase 1a*  
970 *(CPT1a) is part of an outer membrane fatty acid transfer complex*. *J Biol Chem*, 2011.  
971 **286**(29): p. 25655-62.
- 972 52. Heden, T.D., P.D. Neuffer, and K. Funai, *Looking Beyond Structure: Membrane*  
973 *Phospholipids of Skeletal Muscle Mitochondria*. *Trends Endocrinol Metab*, 2016. **27**(8):  
974 p. 553-562.
- 975 53. McGarry, J.D., G.P. Mannaerts, and D.W. Foster, *A possible role for malonyl-CoA in the*  
976 *regulation of hepatic fatty acid oxidation and ketogenesis*. *J Clin Invest*, 1977. **60**(1): p.  
977 265-70.
- 978 54. McGarry, J.D. and N.F. Brown, *The mitochondrial carnitine palmitoyltransferase system.*  
979 *From concept to molecular analysis*. *Eur J Biochem*, 1997. **244**(1): p. 1-14.
- 980 55. Bensard, C.L., et al., *Regulation of Tumor Initiation by the Mitochondrial Pyruvate*  
981 *Carrier*. *Cell Metab*, 2020. **31**(2): p. 284-300 e7.
- 982 56. Cluntun, A.A., et al., *The pyruvate-lactate axis modulates cardiac hypertrophy and heart*  
983 *failure*. *Cell Metab*, 2021. **33**(3): p. 629-648 e10.
- 984 57. Lark, D.S., et al., *Direct real-time quantification of mitochondrial oxidative*  
985 *phosphorylation efficiency in permeabilized skeletal muscle myofibers*. *Am J Physiol Cell*  
986 *Physiol*, 2016. **311**(2): p. C239-45.
- 987 58. Matyash, V., et al., *Lipid extraction by methyl-tert-butyl ether for high-throughput*  
988 *lipidomics*. *J Lipid Res*, 2008. **49**(5): p. 1137-46.
- 989 59. Koelmel, J.P., et al., *Expanding Lipidome Coverage Using LC-MS/MS Data-Dependent*  
990 *Acquisition with Automated Exclusion List Generation*. *J Am Soc Mass Spectrom*, 2017.  
991 **28**(5): p. 908-917.
- 992 60. Heden, T.D., et al., *Greater Oxidative Capacity in Primary Myotubes from Endurance-*  
993 *trained Women*. *Med Sci Sports Exerc*, 2017. **49**(11): p. 2151-2157.
- 994 61. Dixon, S.J., et al., *Ferroptosis: an iron-dependent form of nonapoptotic cell death*. *Cell*,  
995 2012. **149**(5): p. 1060-72.

**Figure 1**

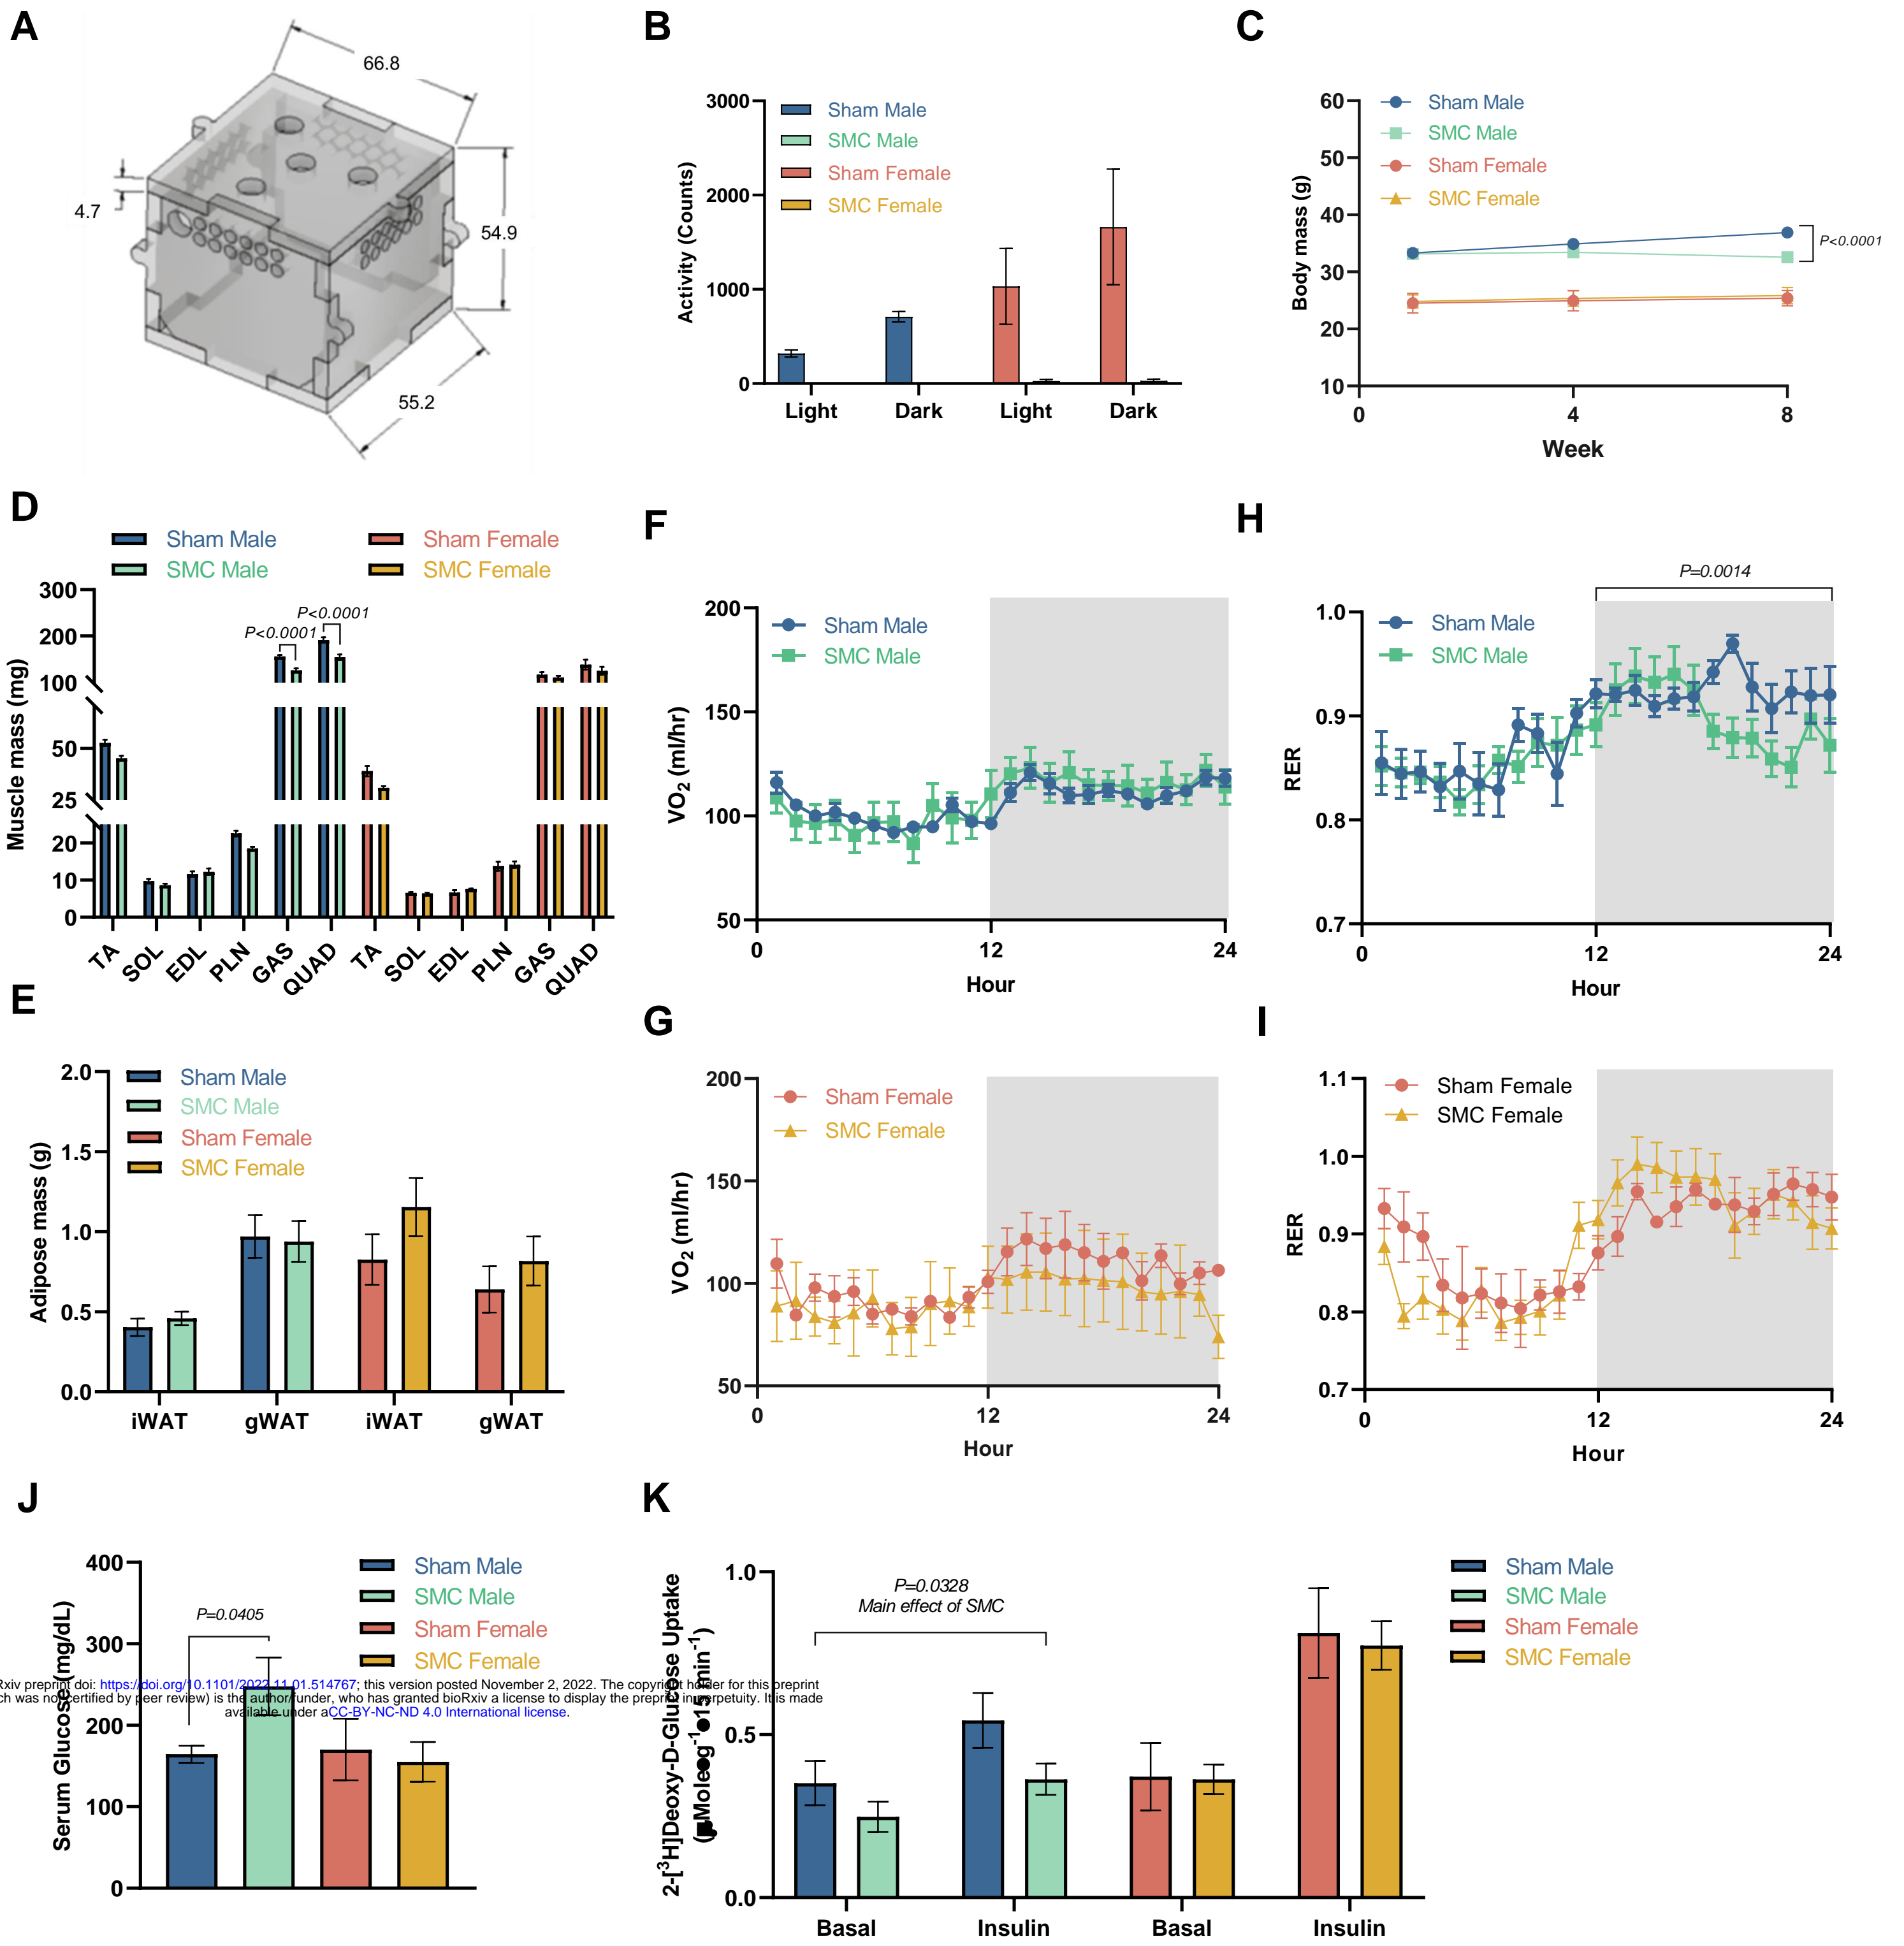

Figure 1 Supplement 1

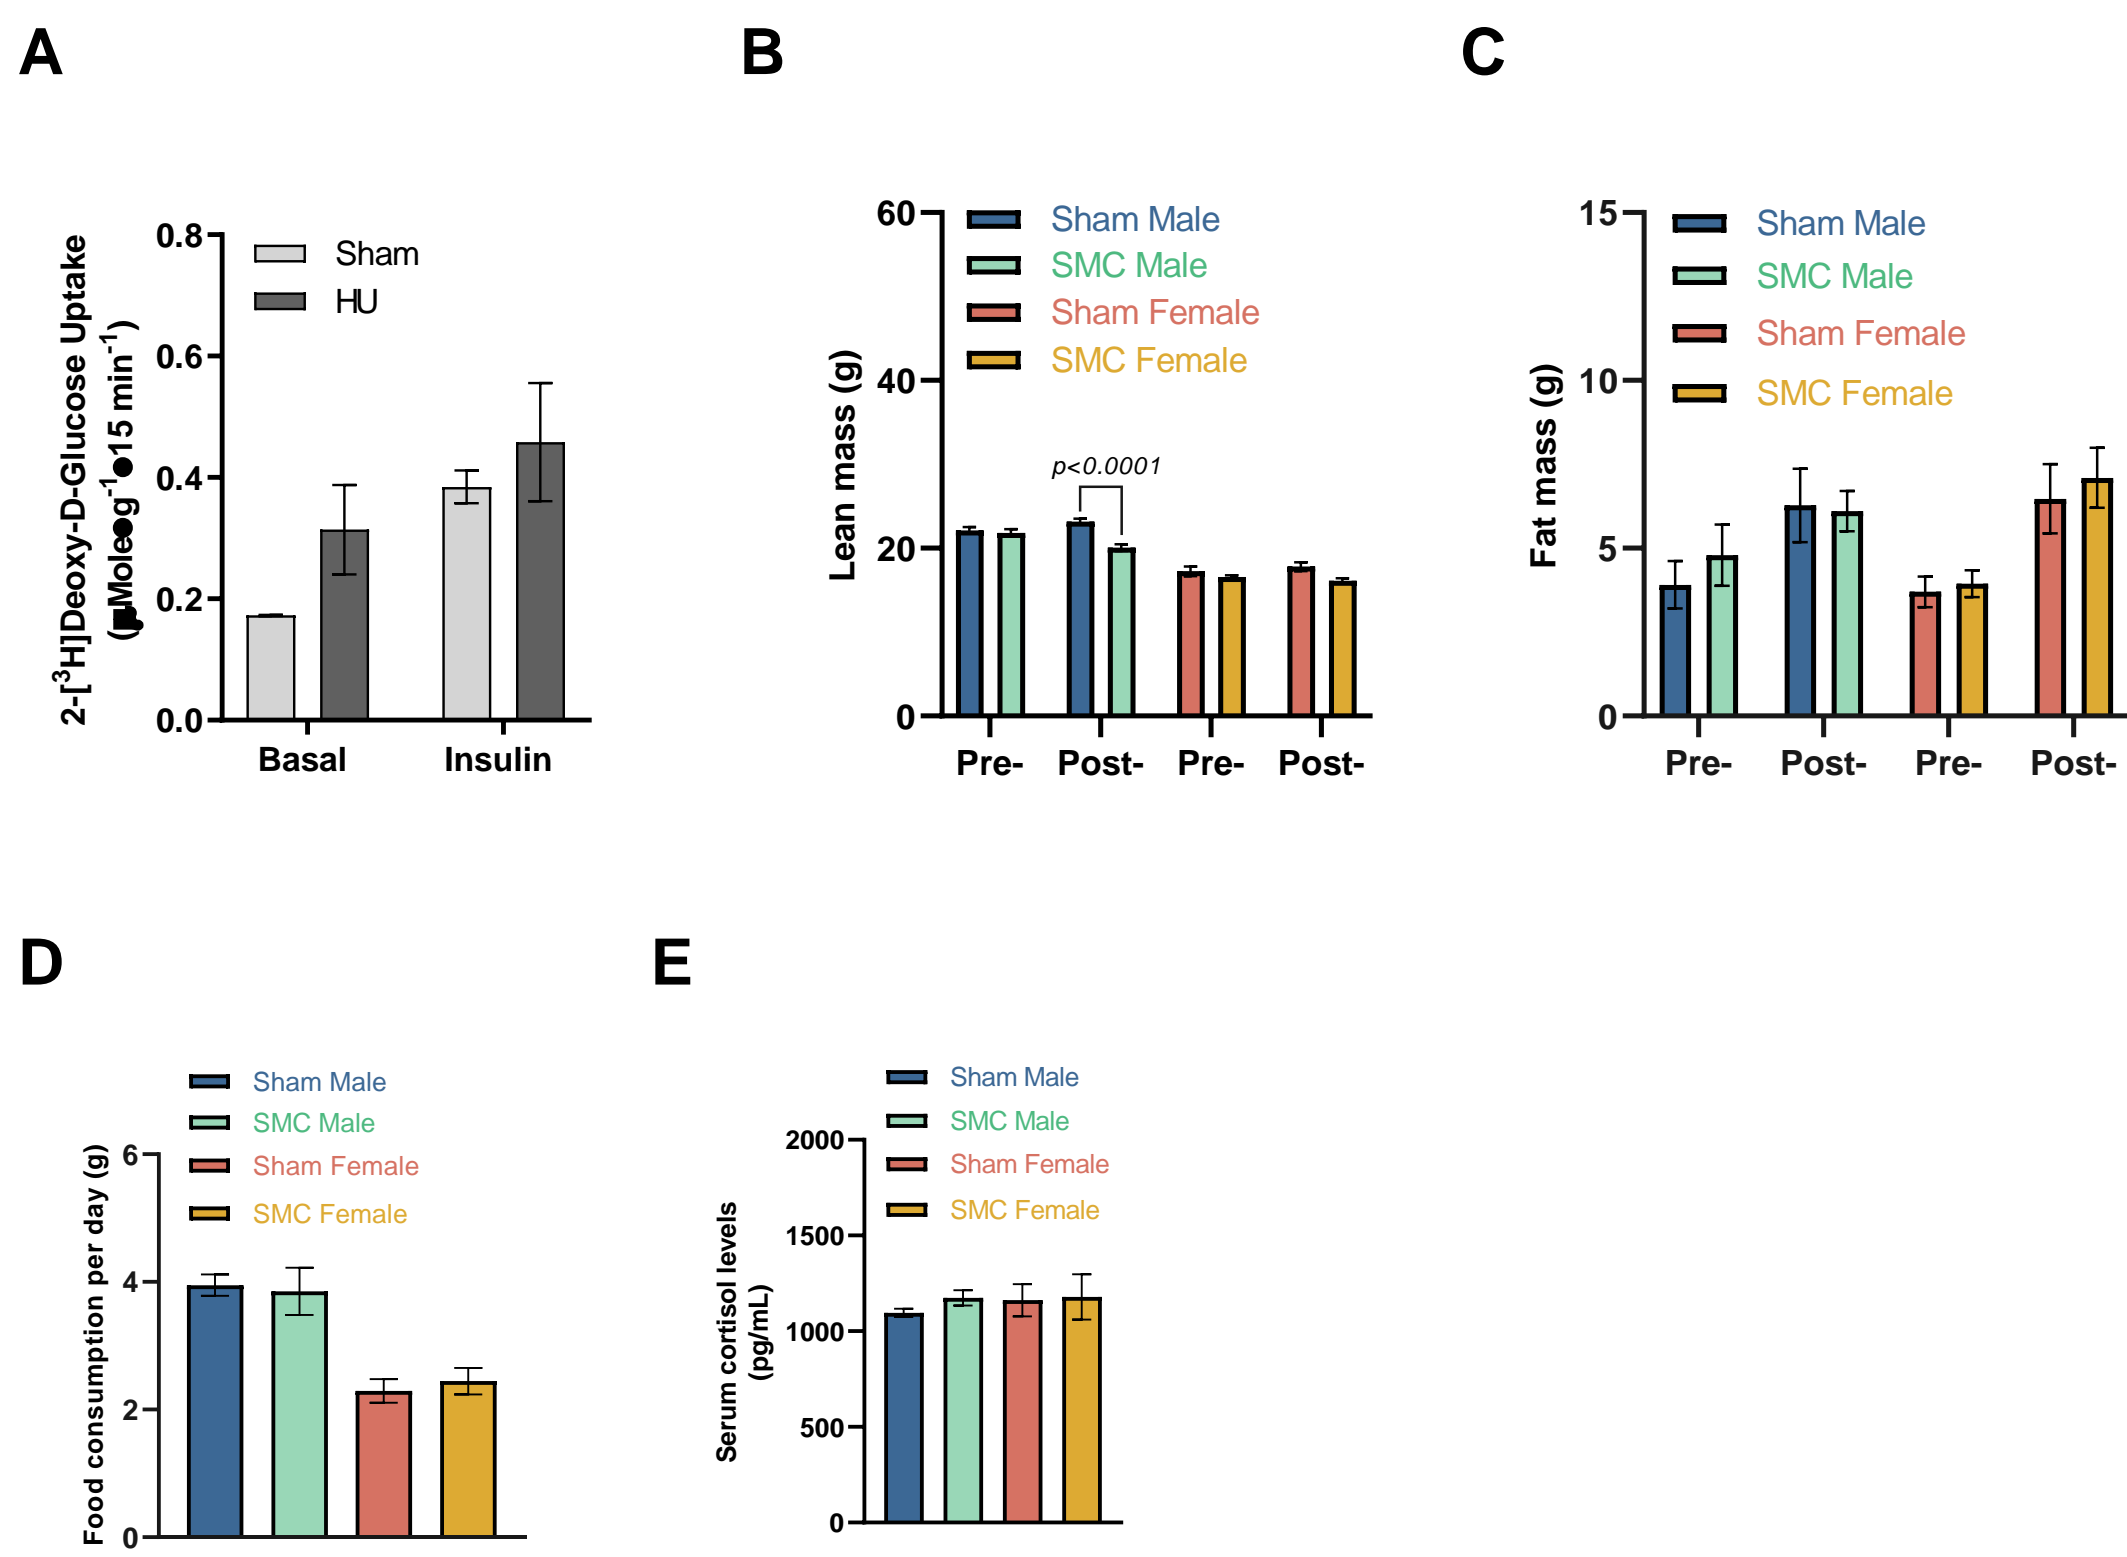



**Figure 2**

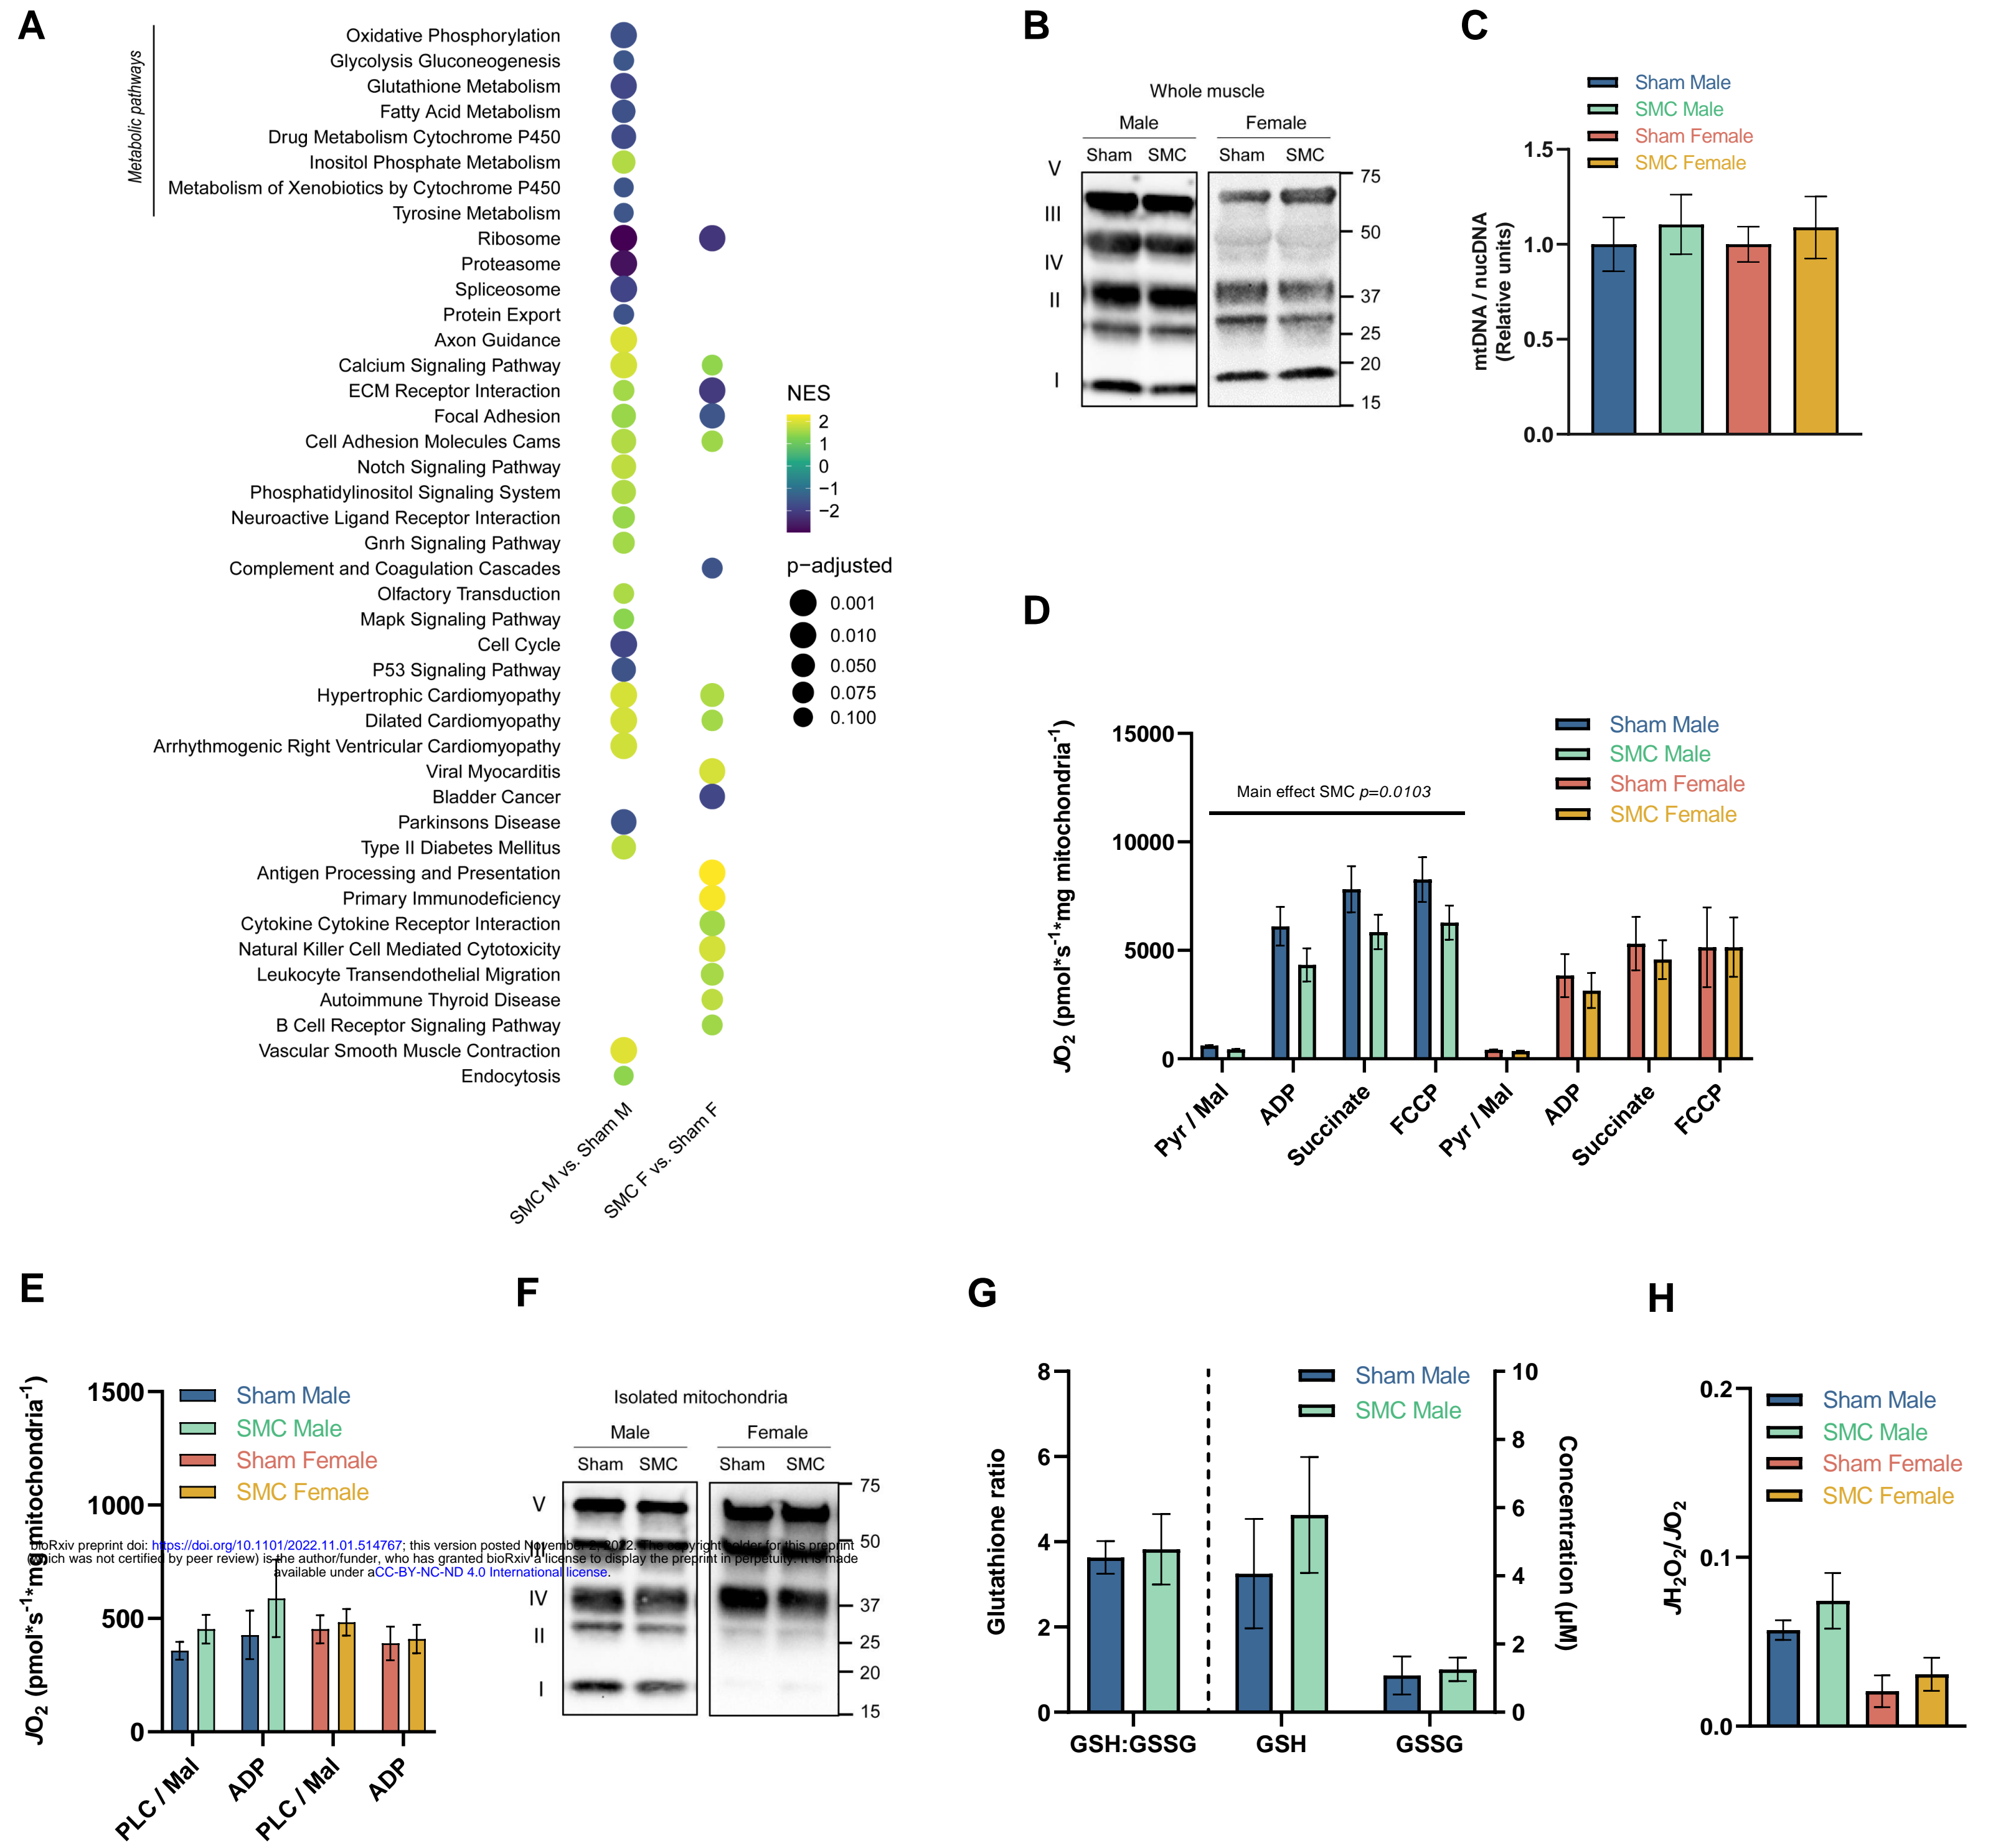

**Figure 2 Supplement 1**

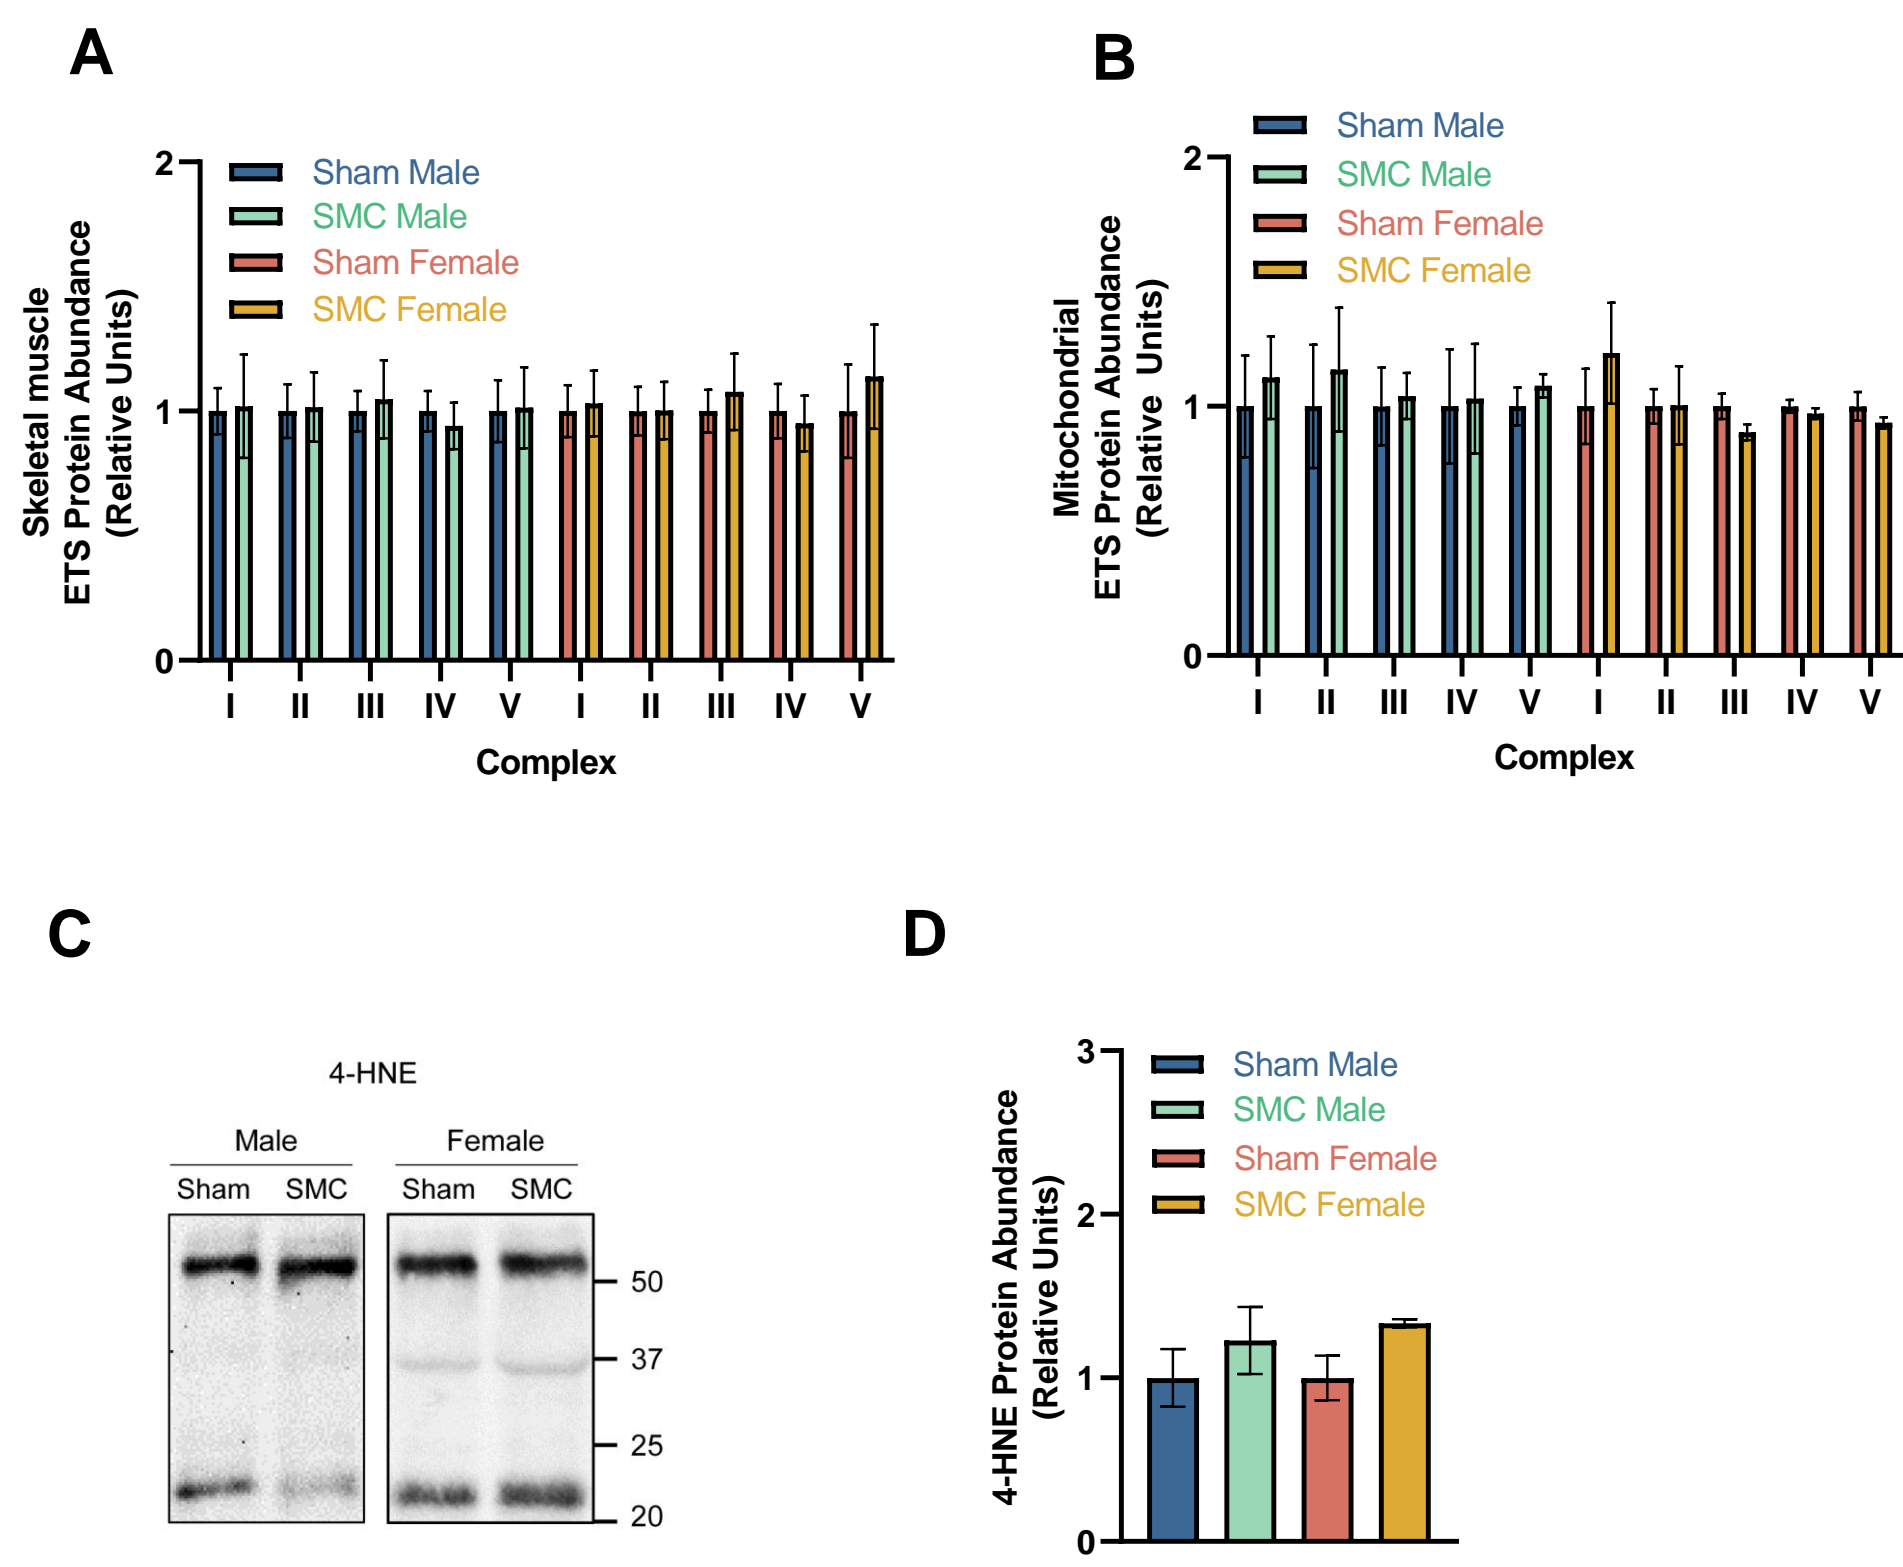

**Figure 3**

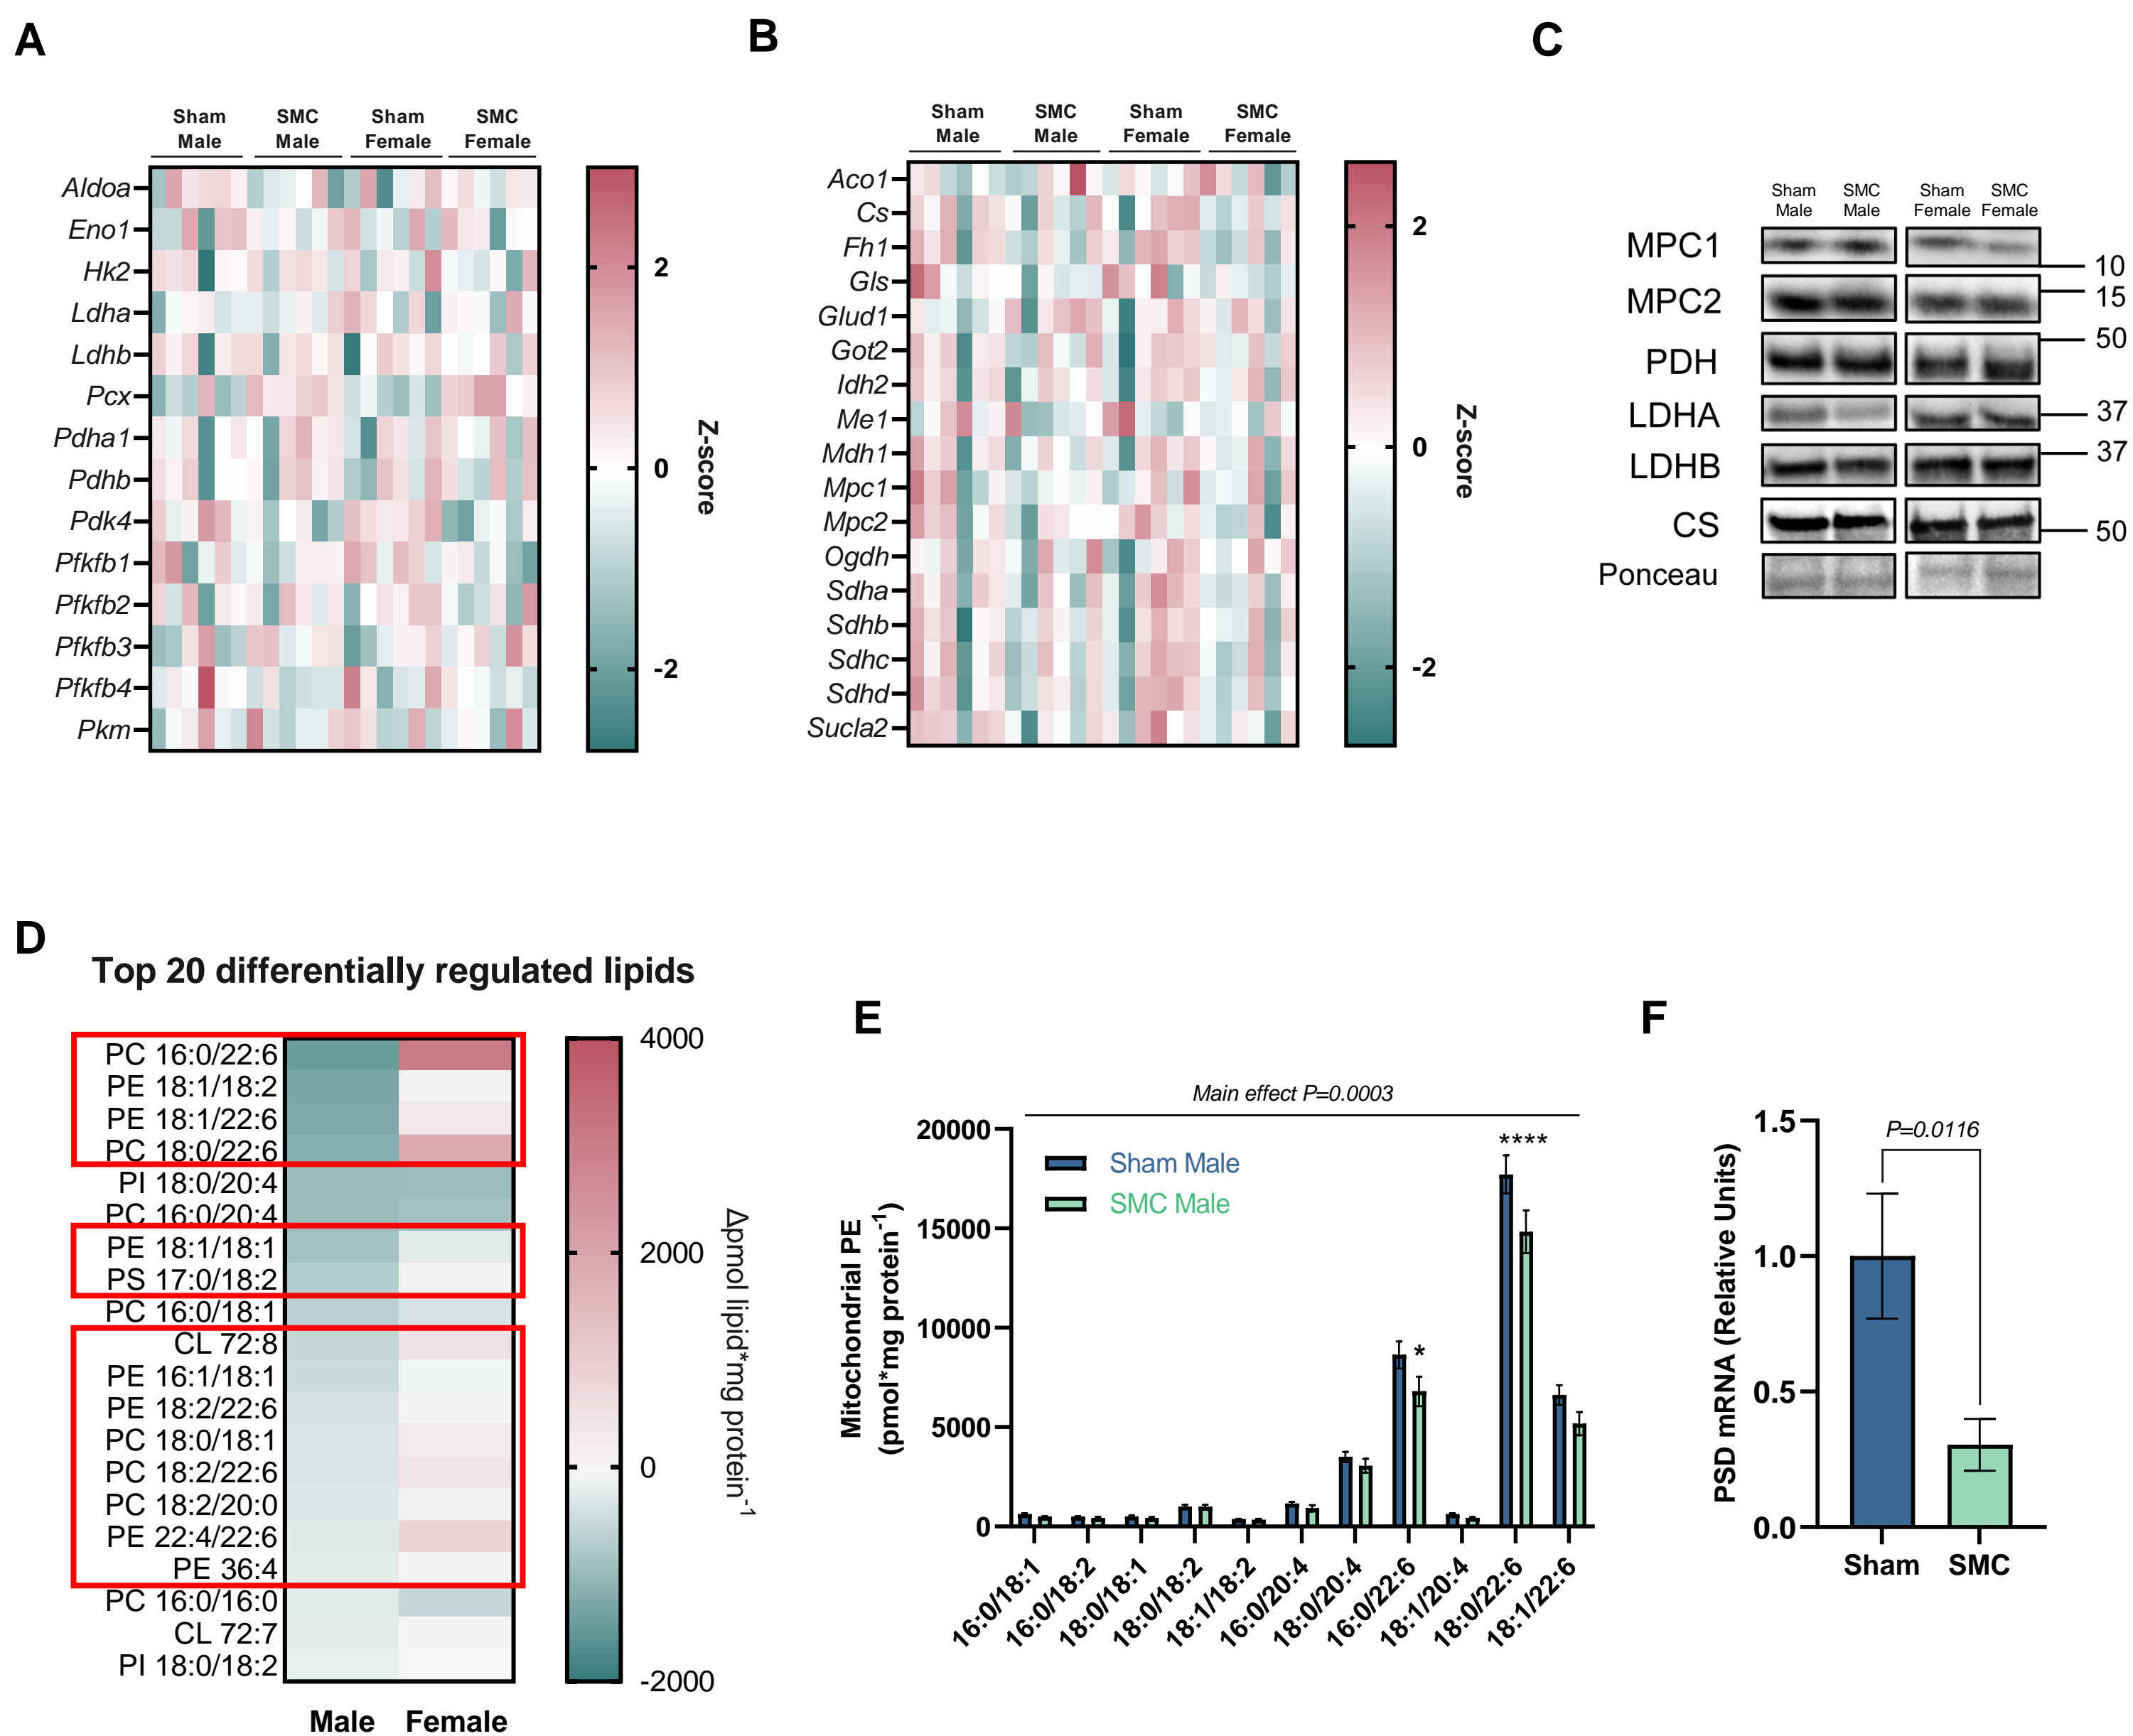

Figure 3 – Supplement 1

**A**

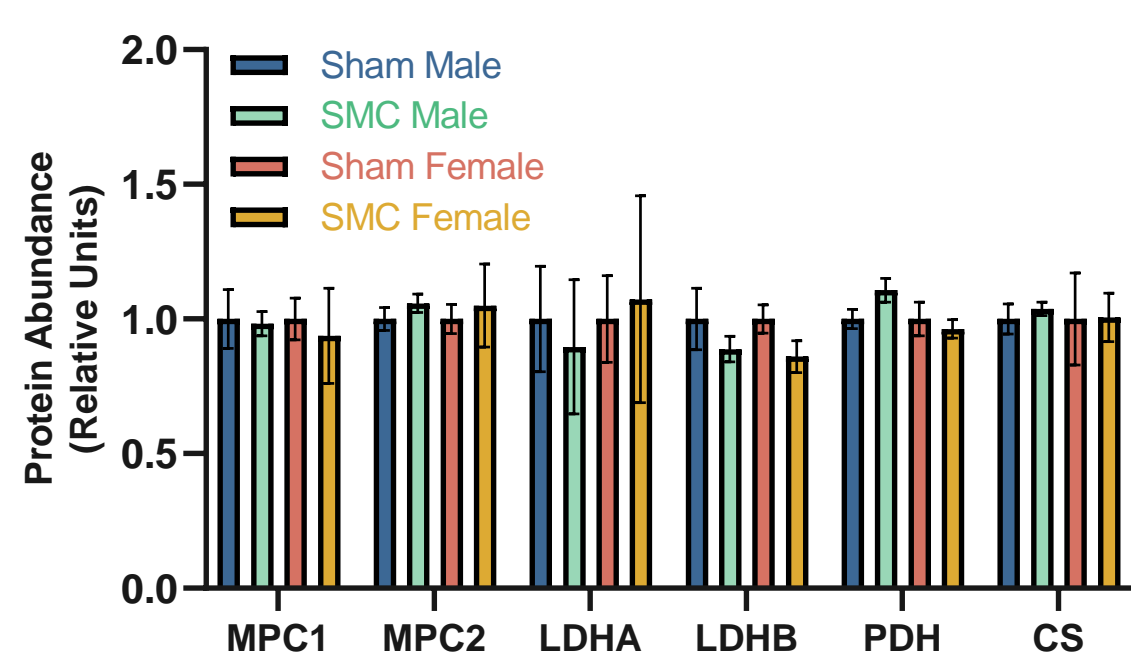

**B**

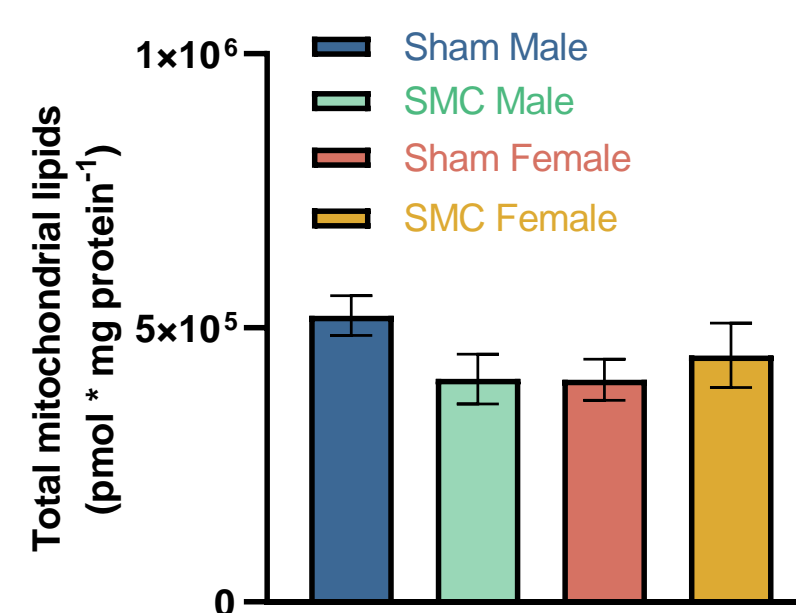

**C**

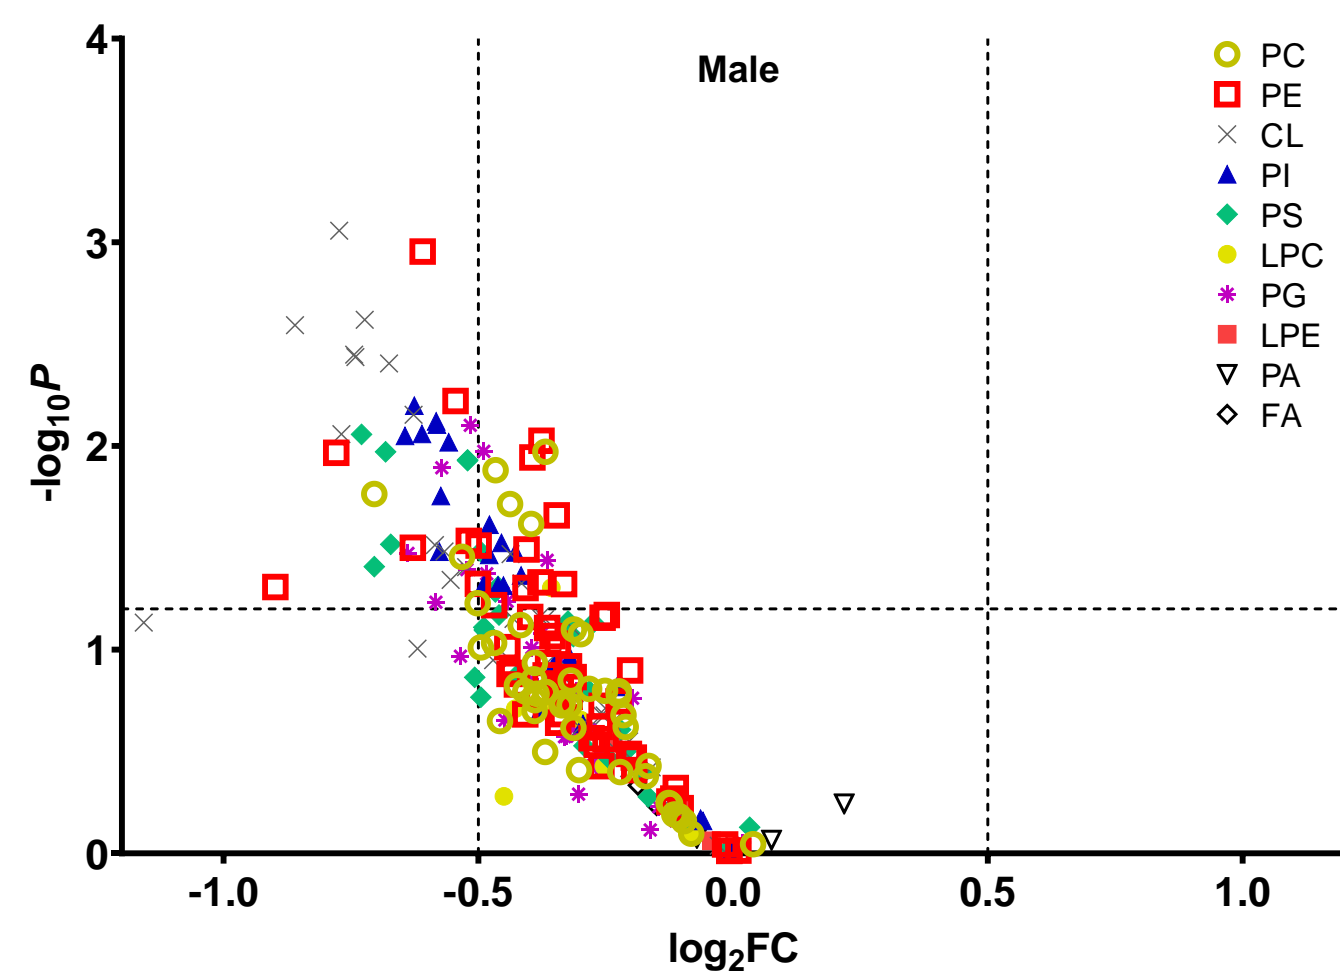

**E**

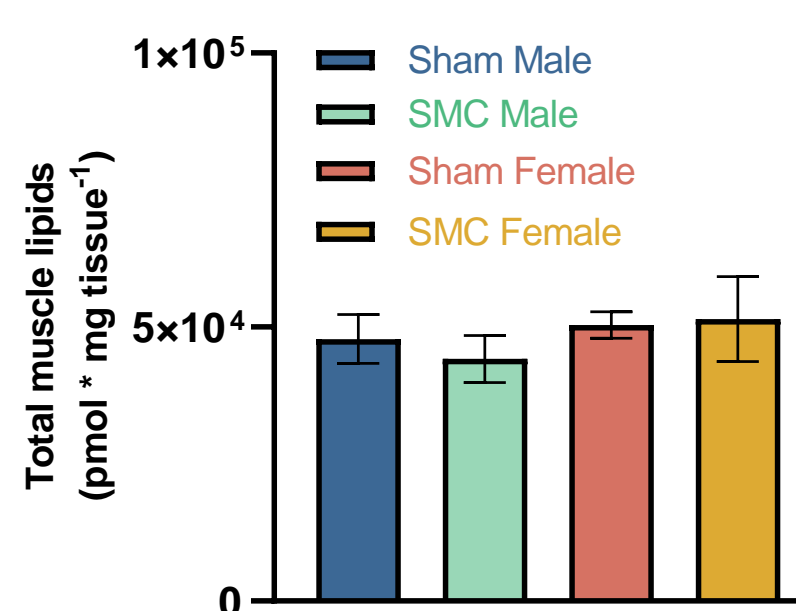

**D**

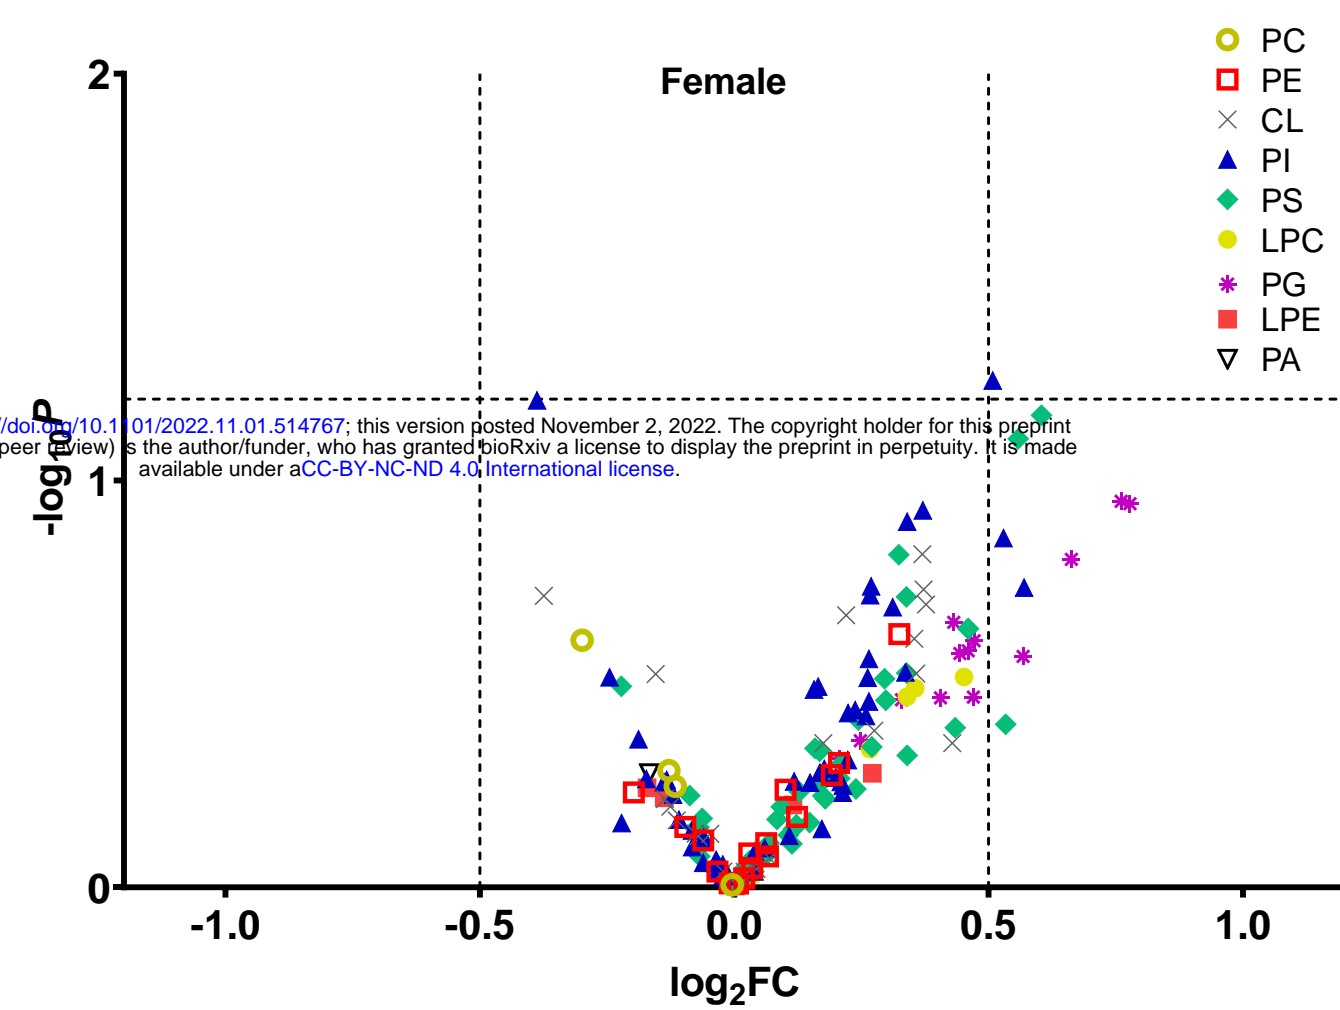

**F**

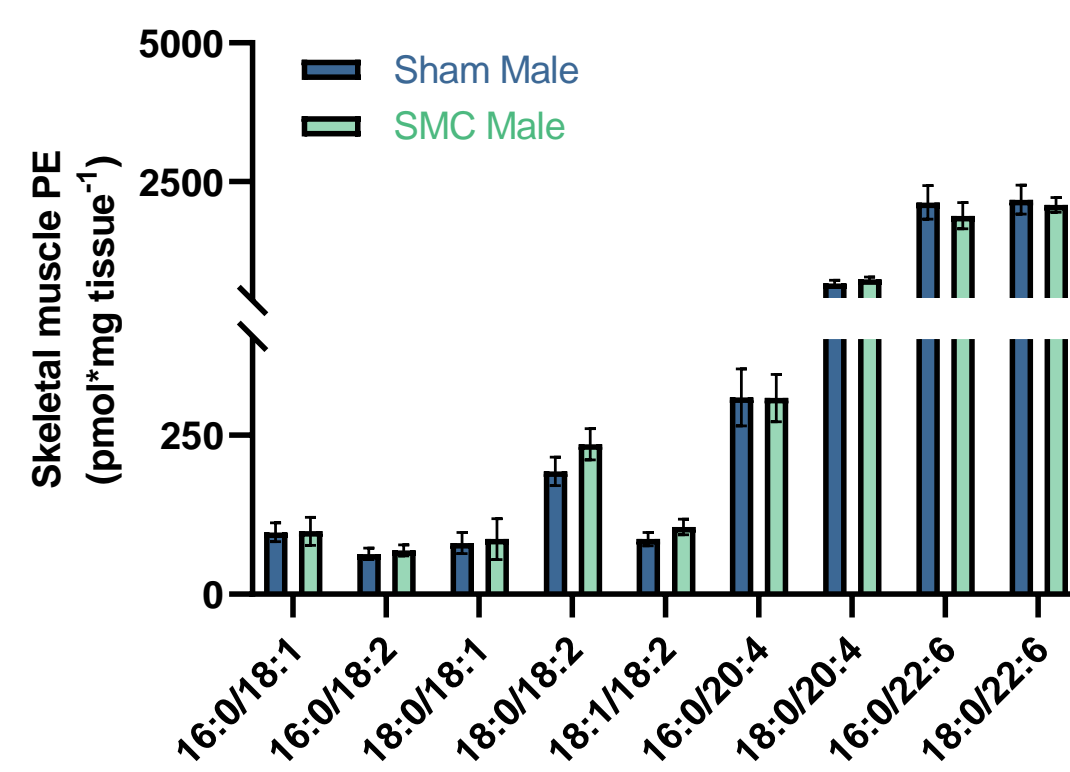

**Figure 4**

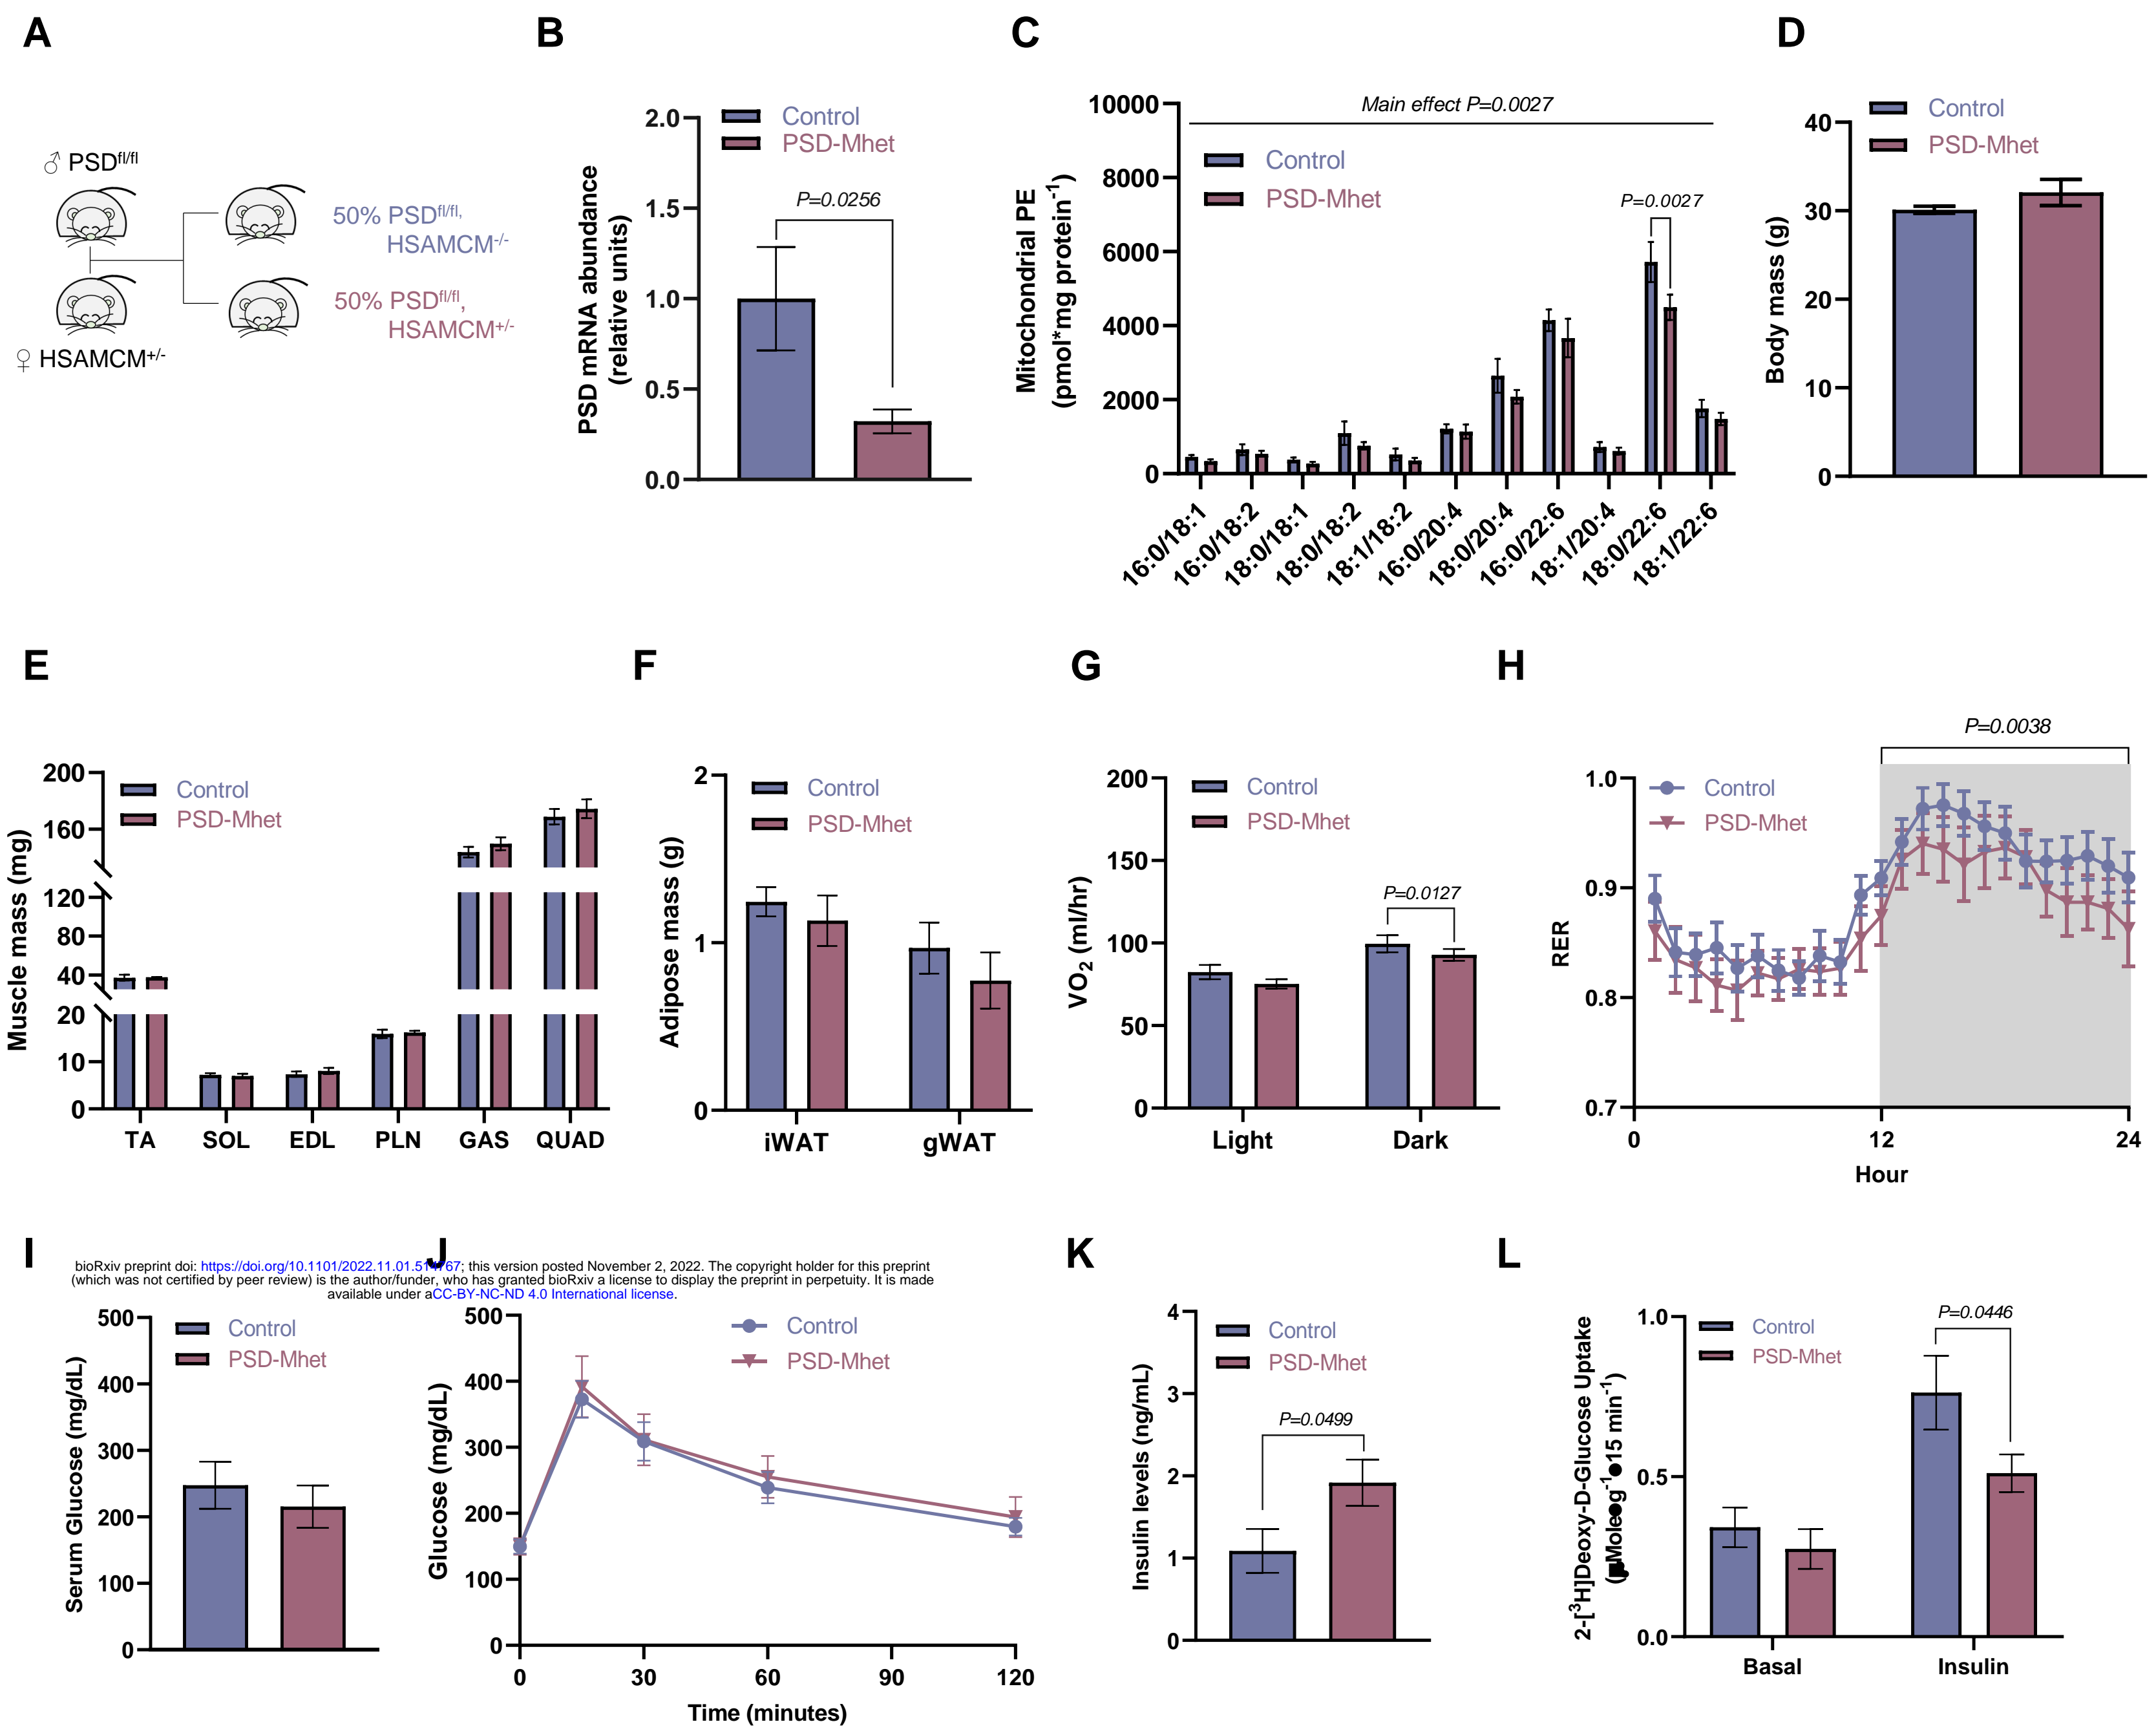

Figure 4 Supplement 1

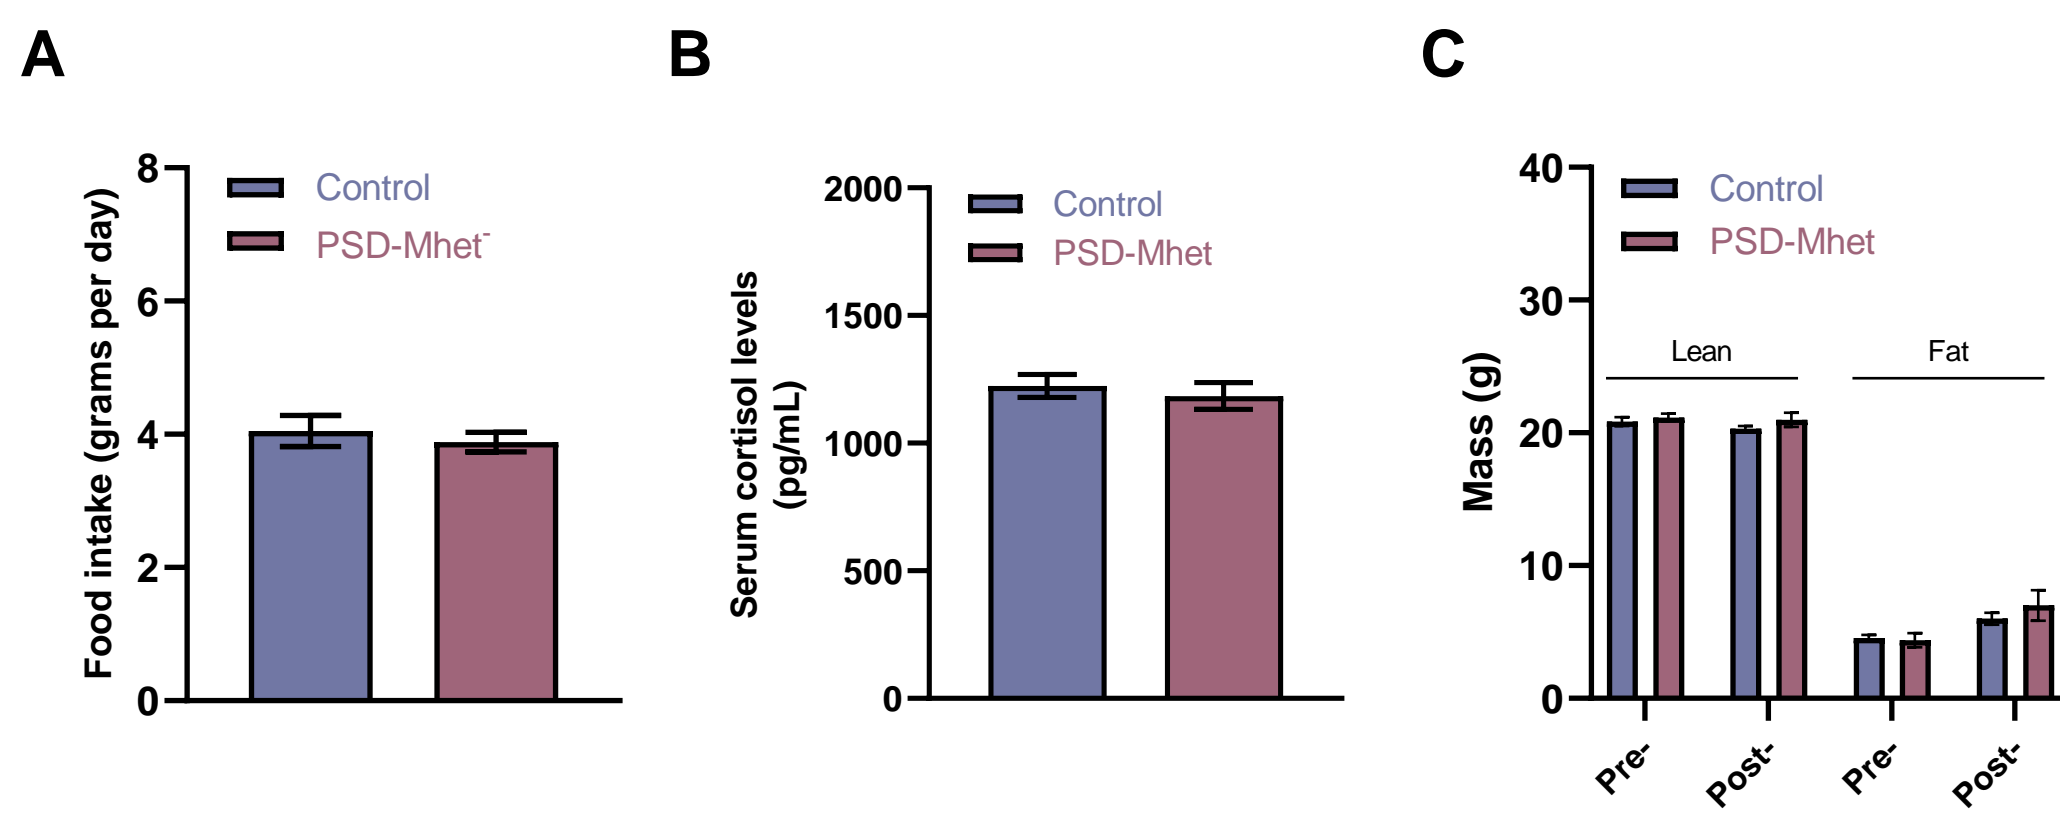

**Figure 5**

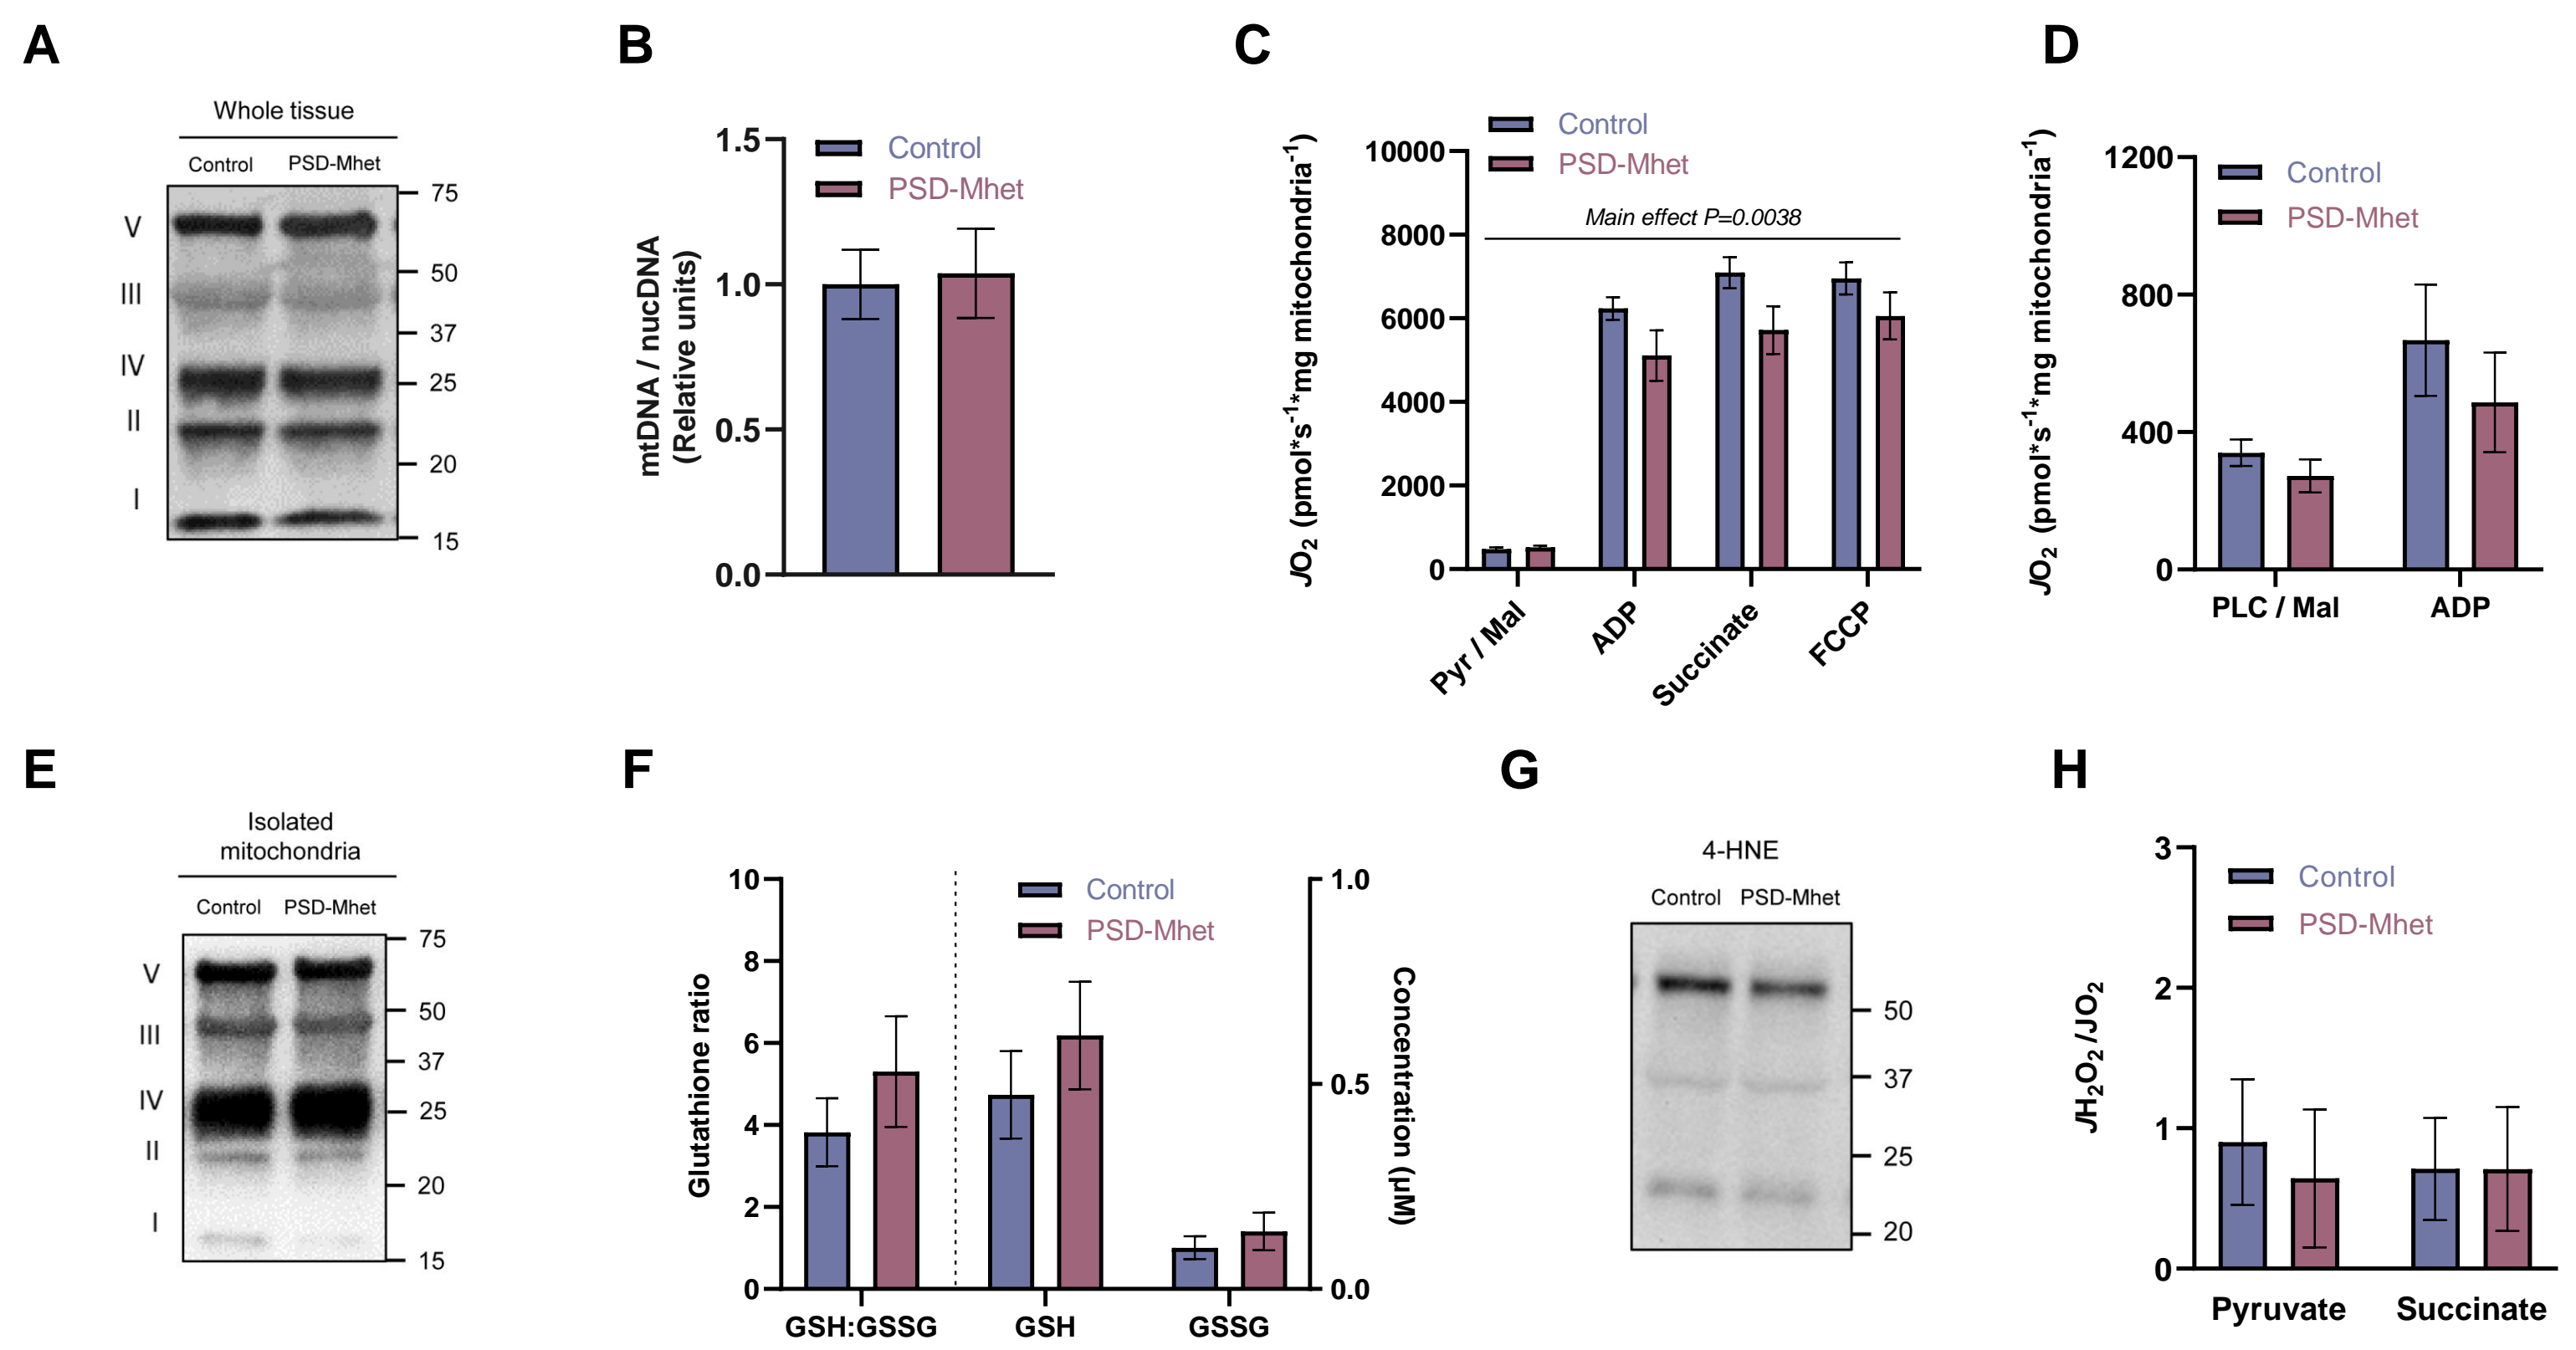

Figure 5 Supplement 1

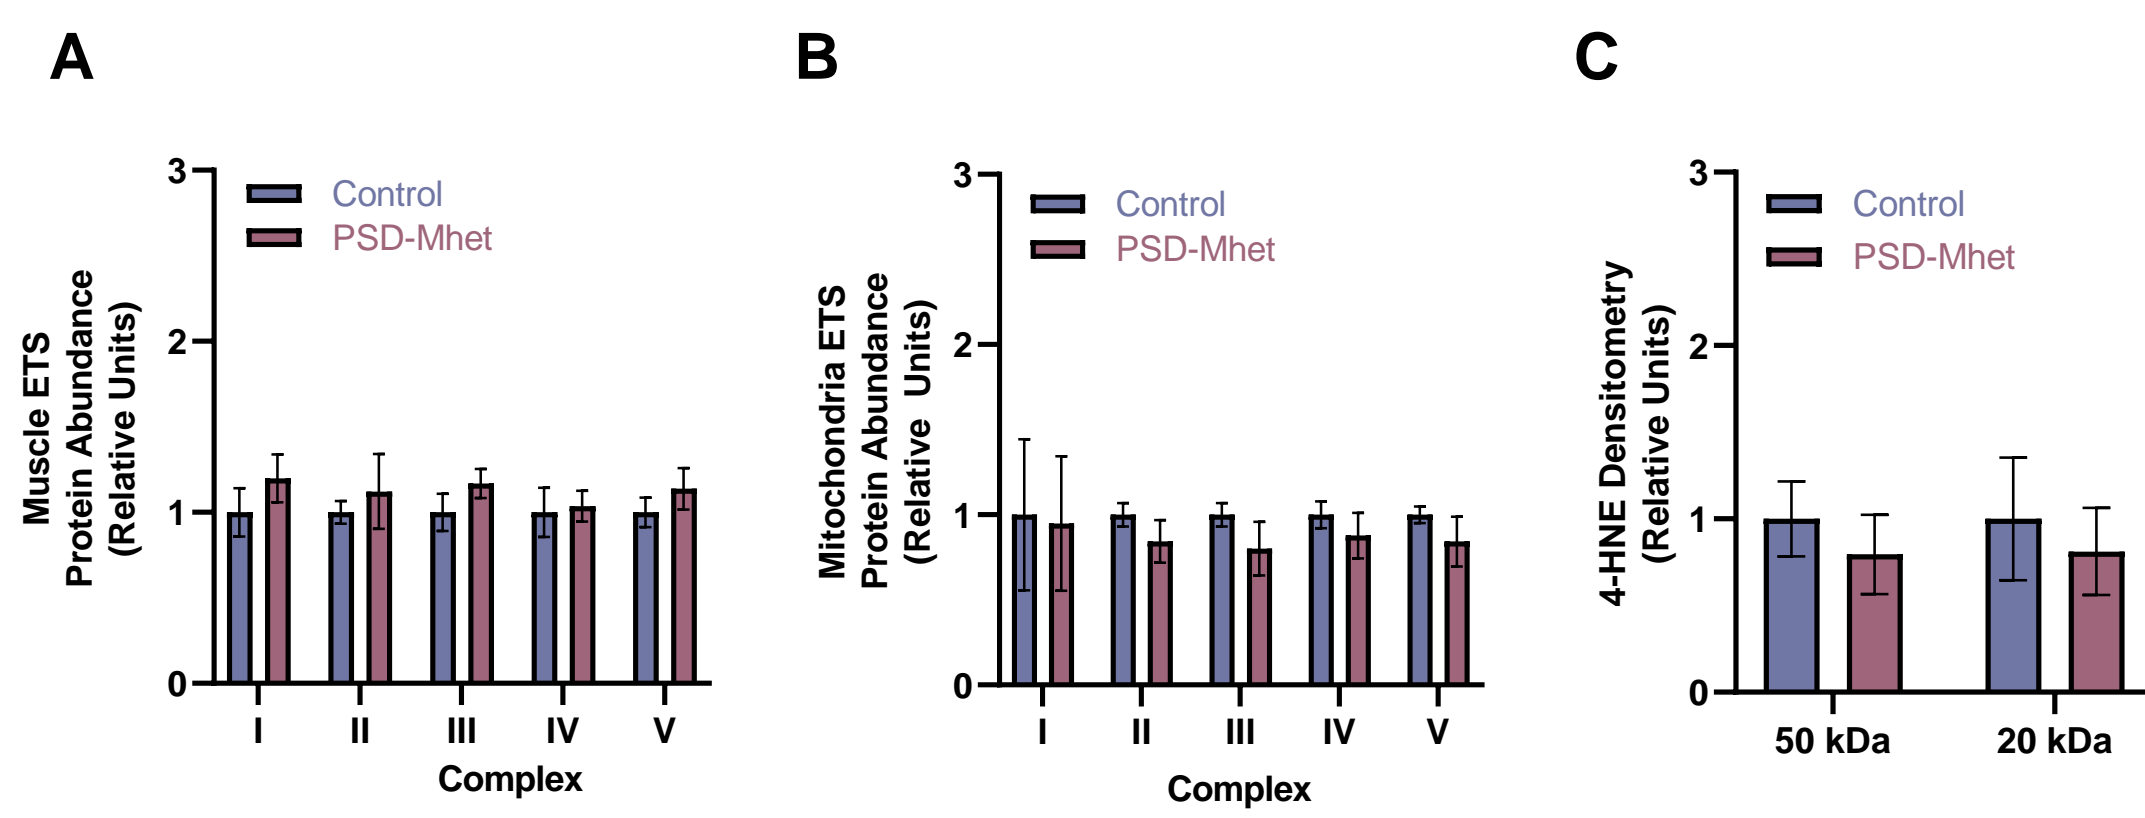



**Figure 6**

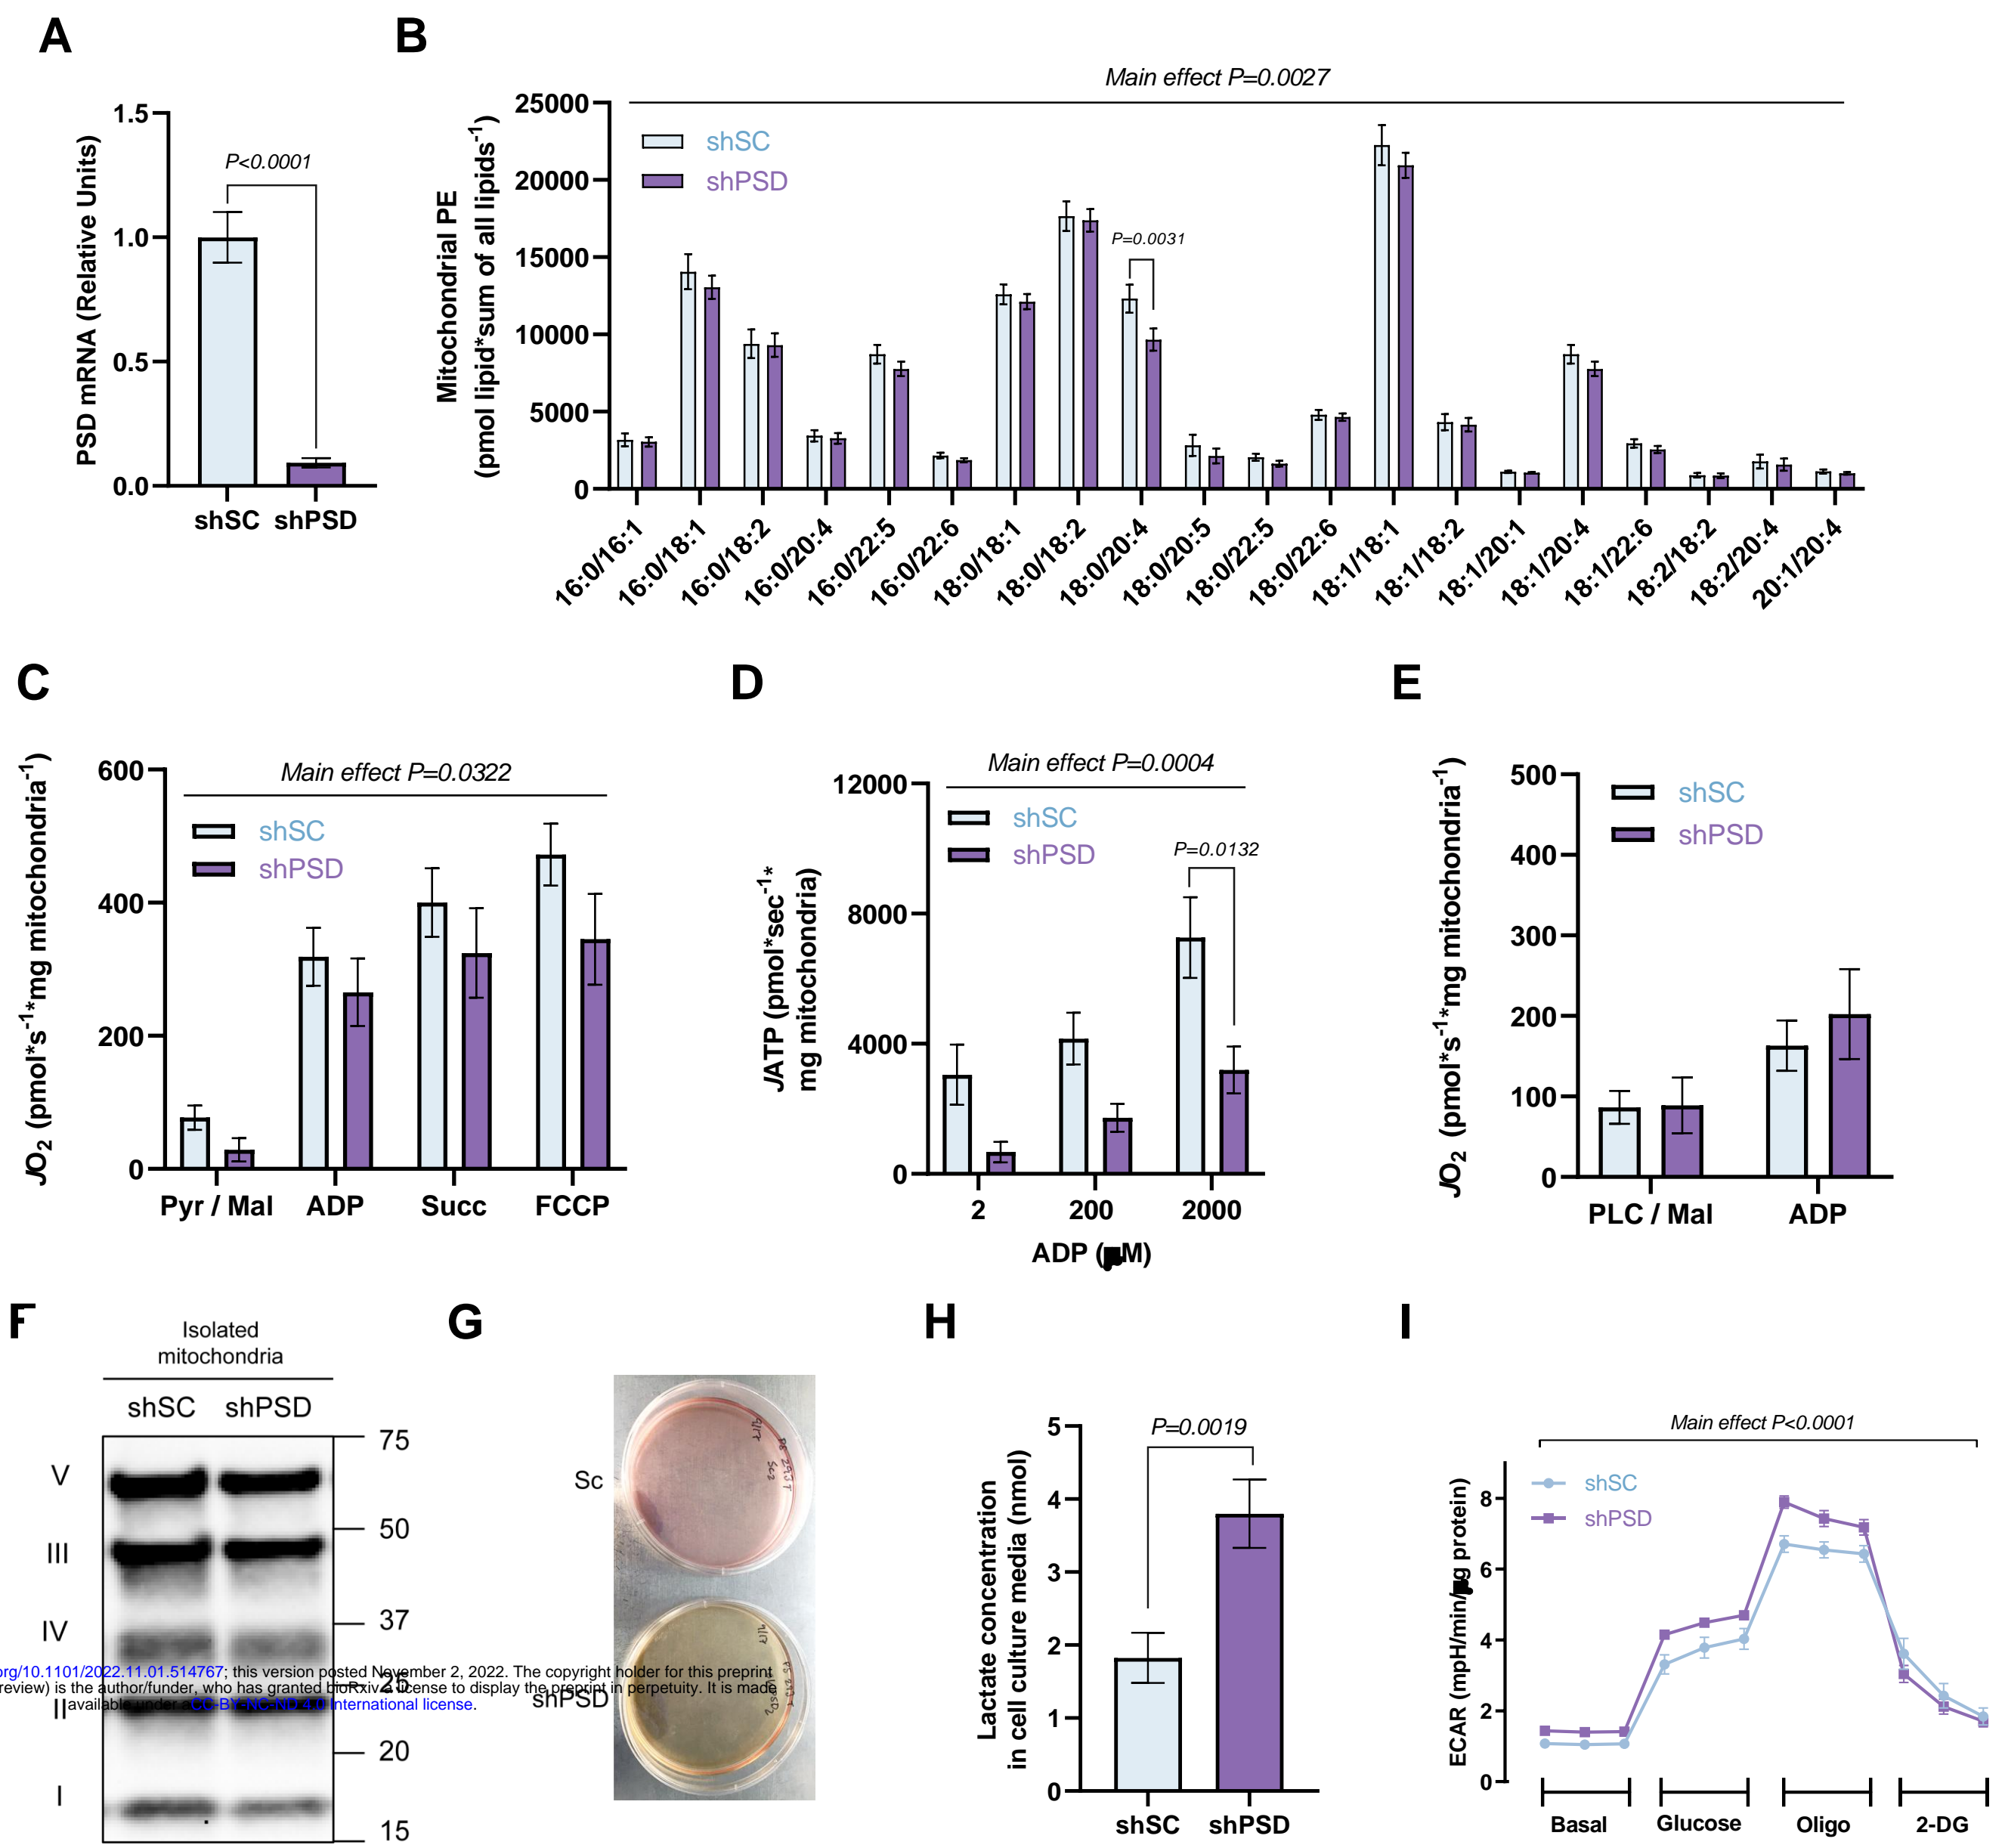

Figure 6 Supplement 1

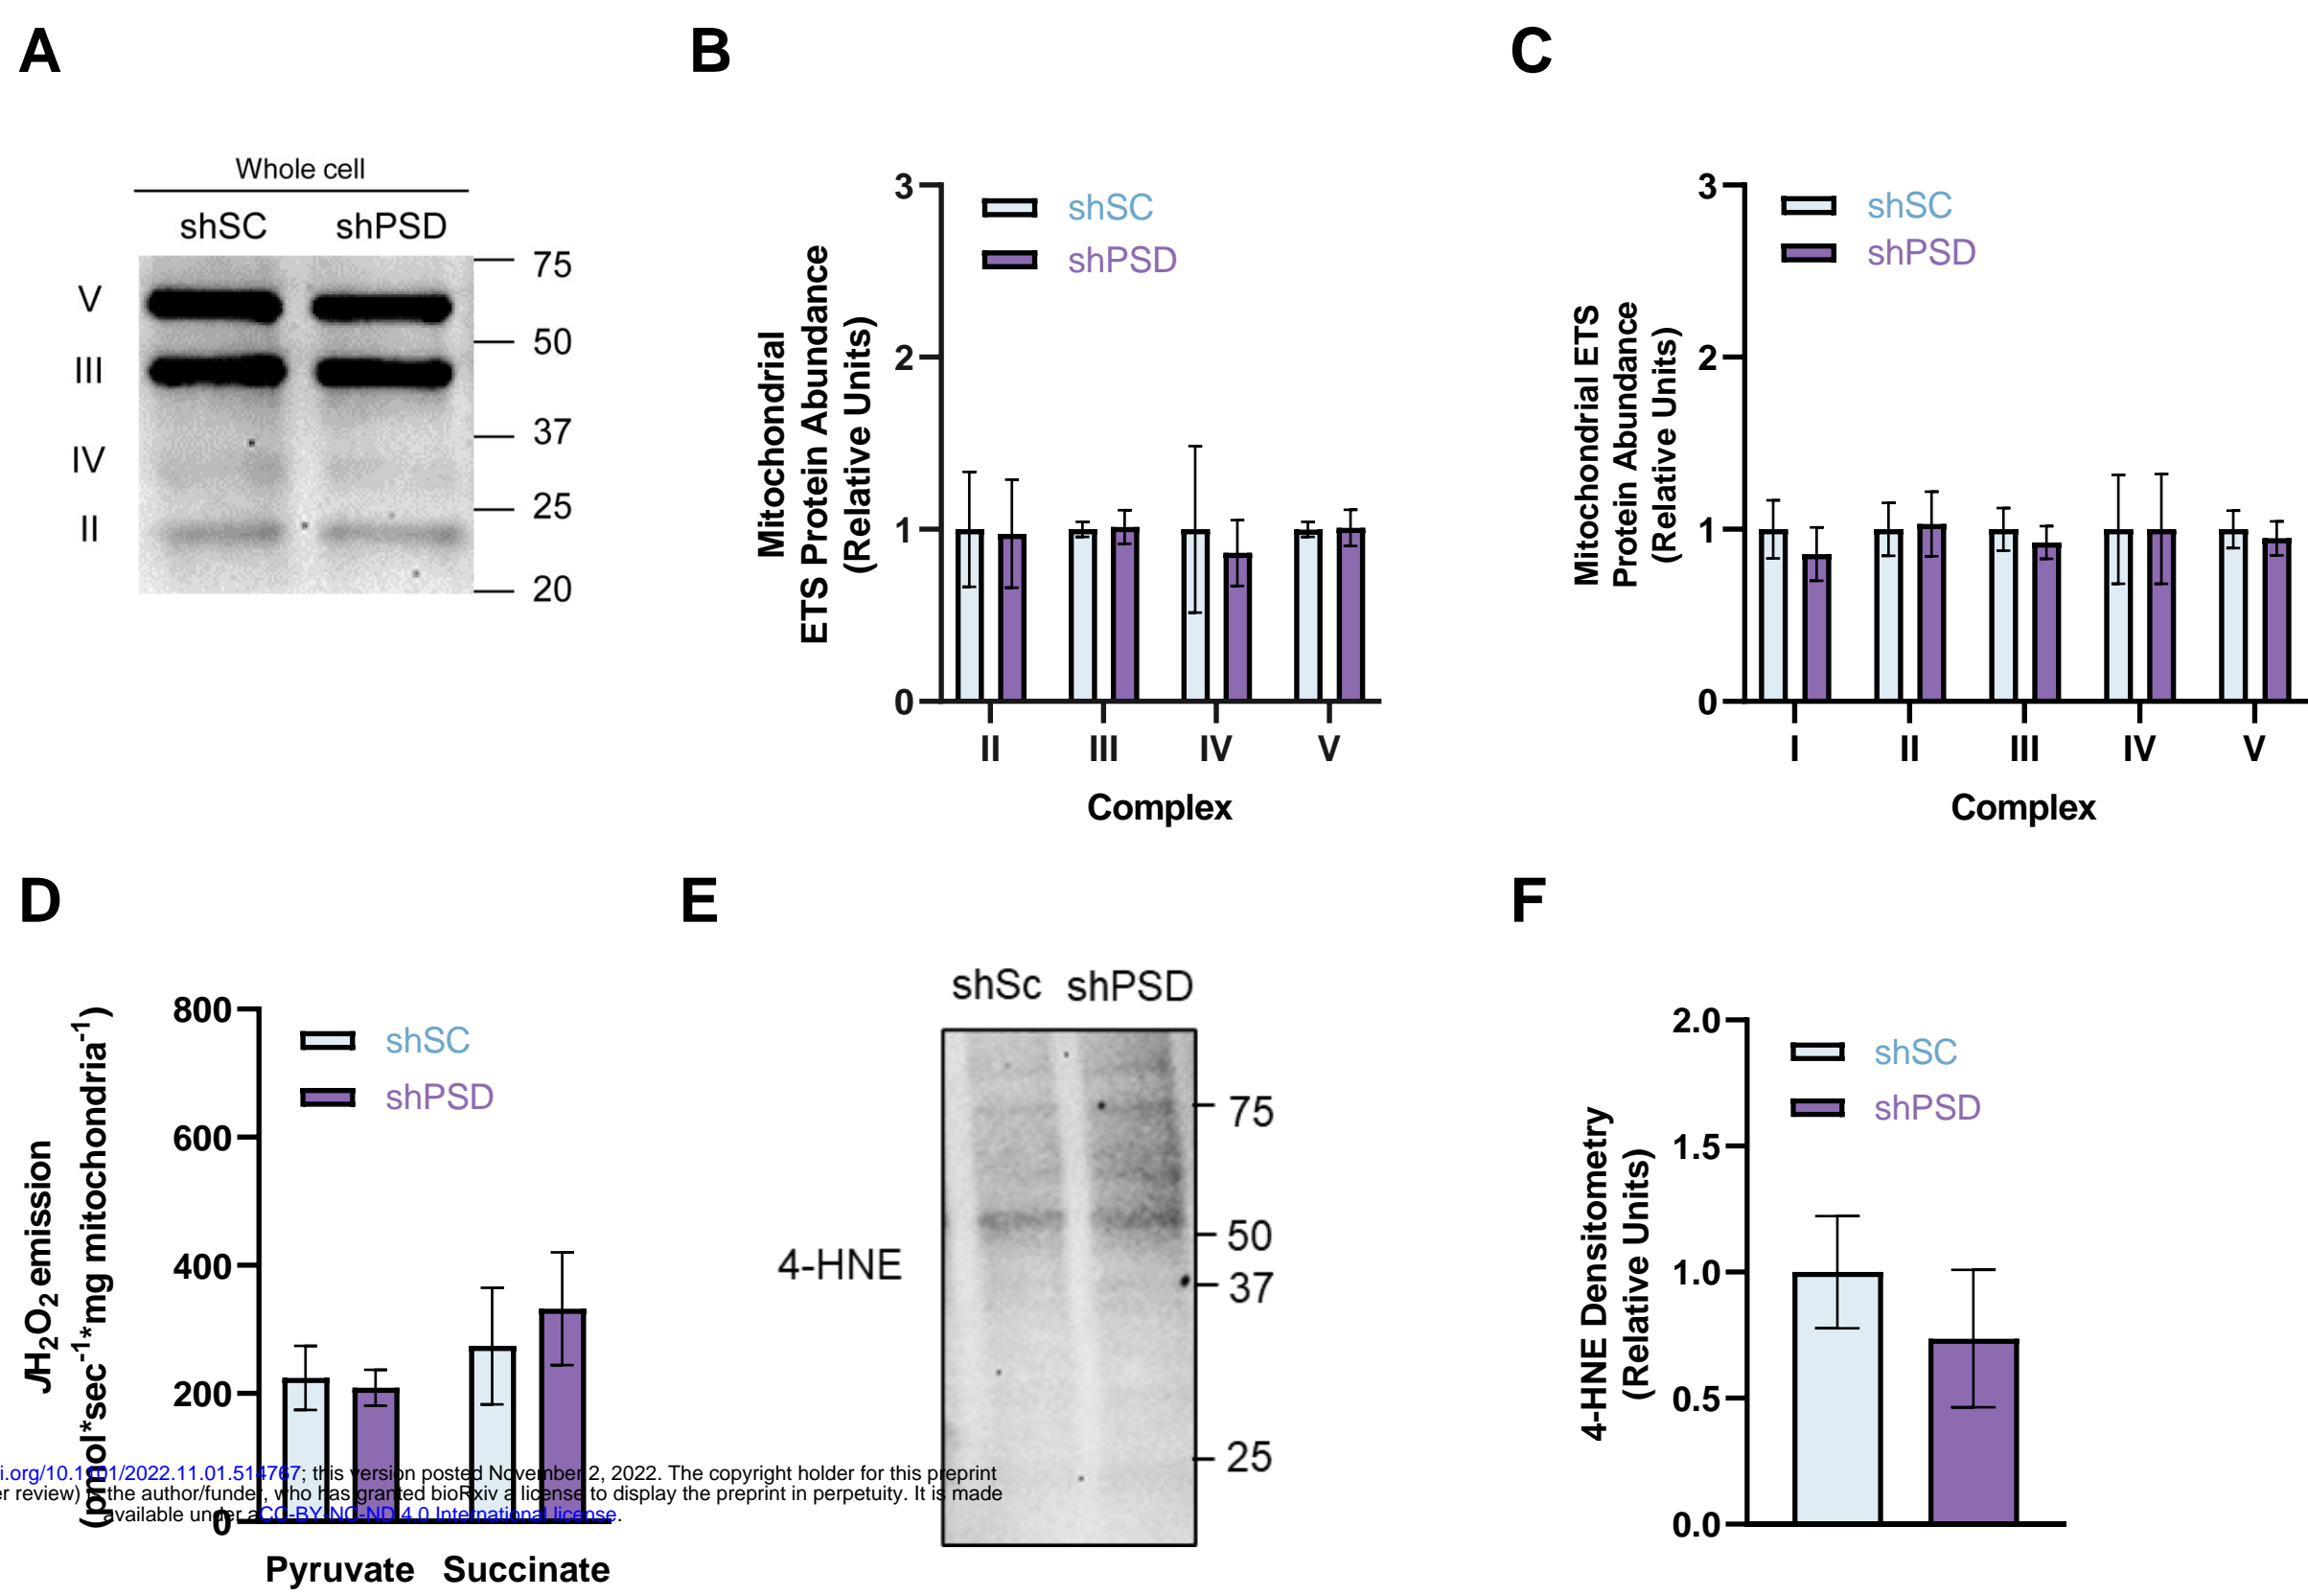

**Figure 7**

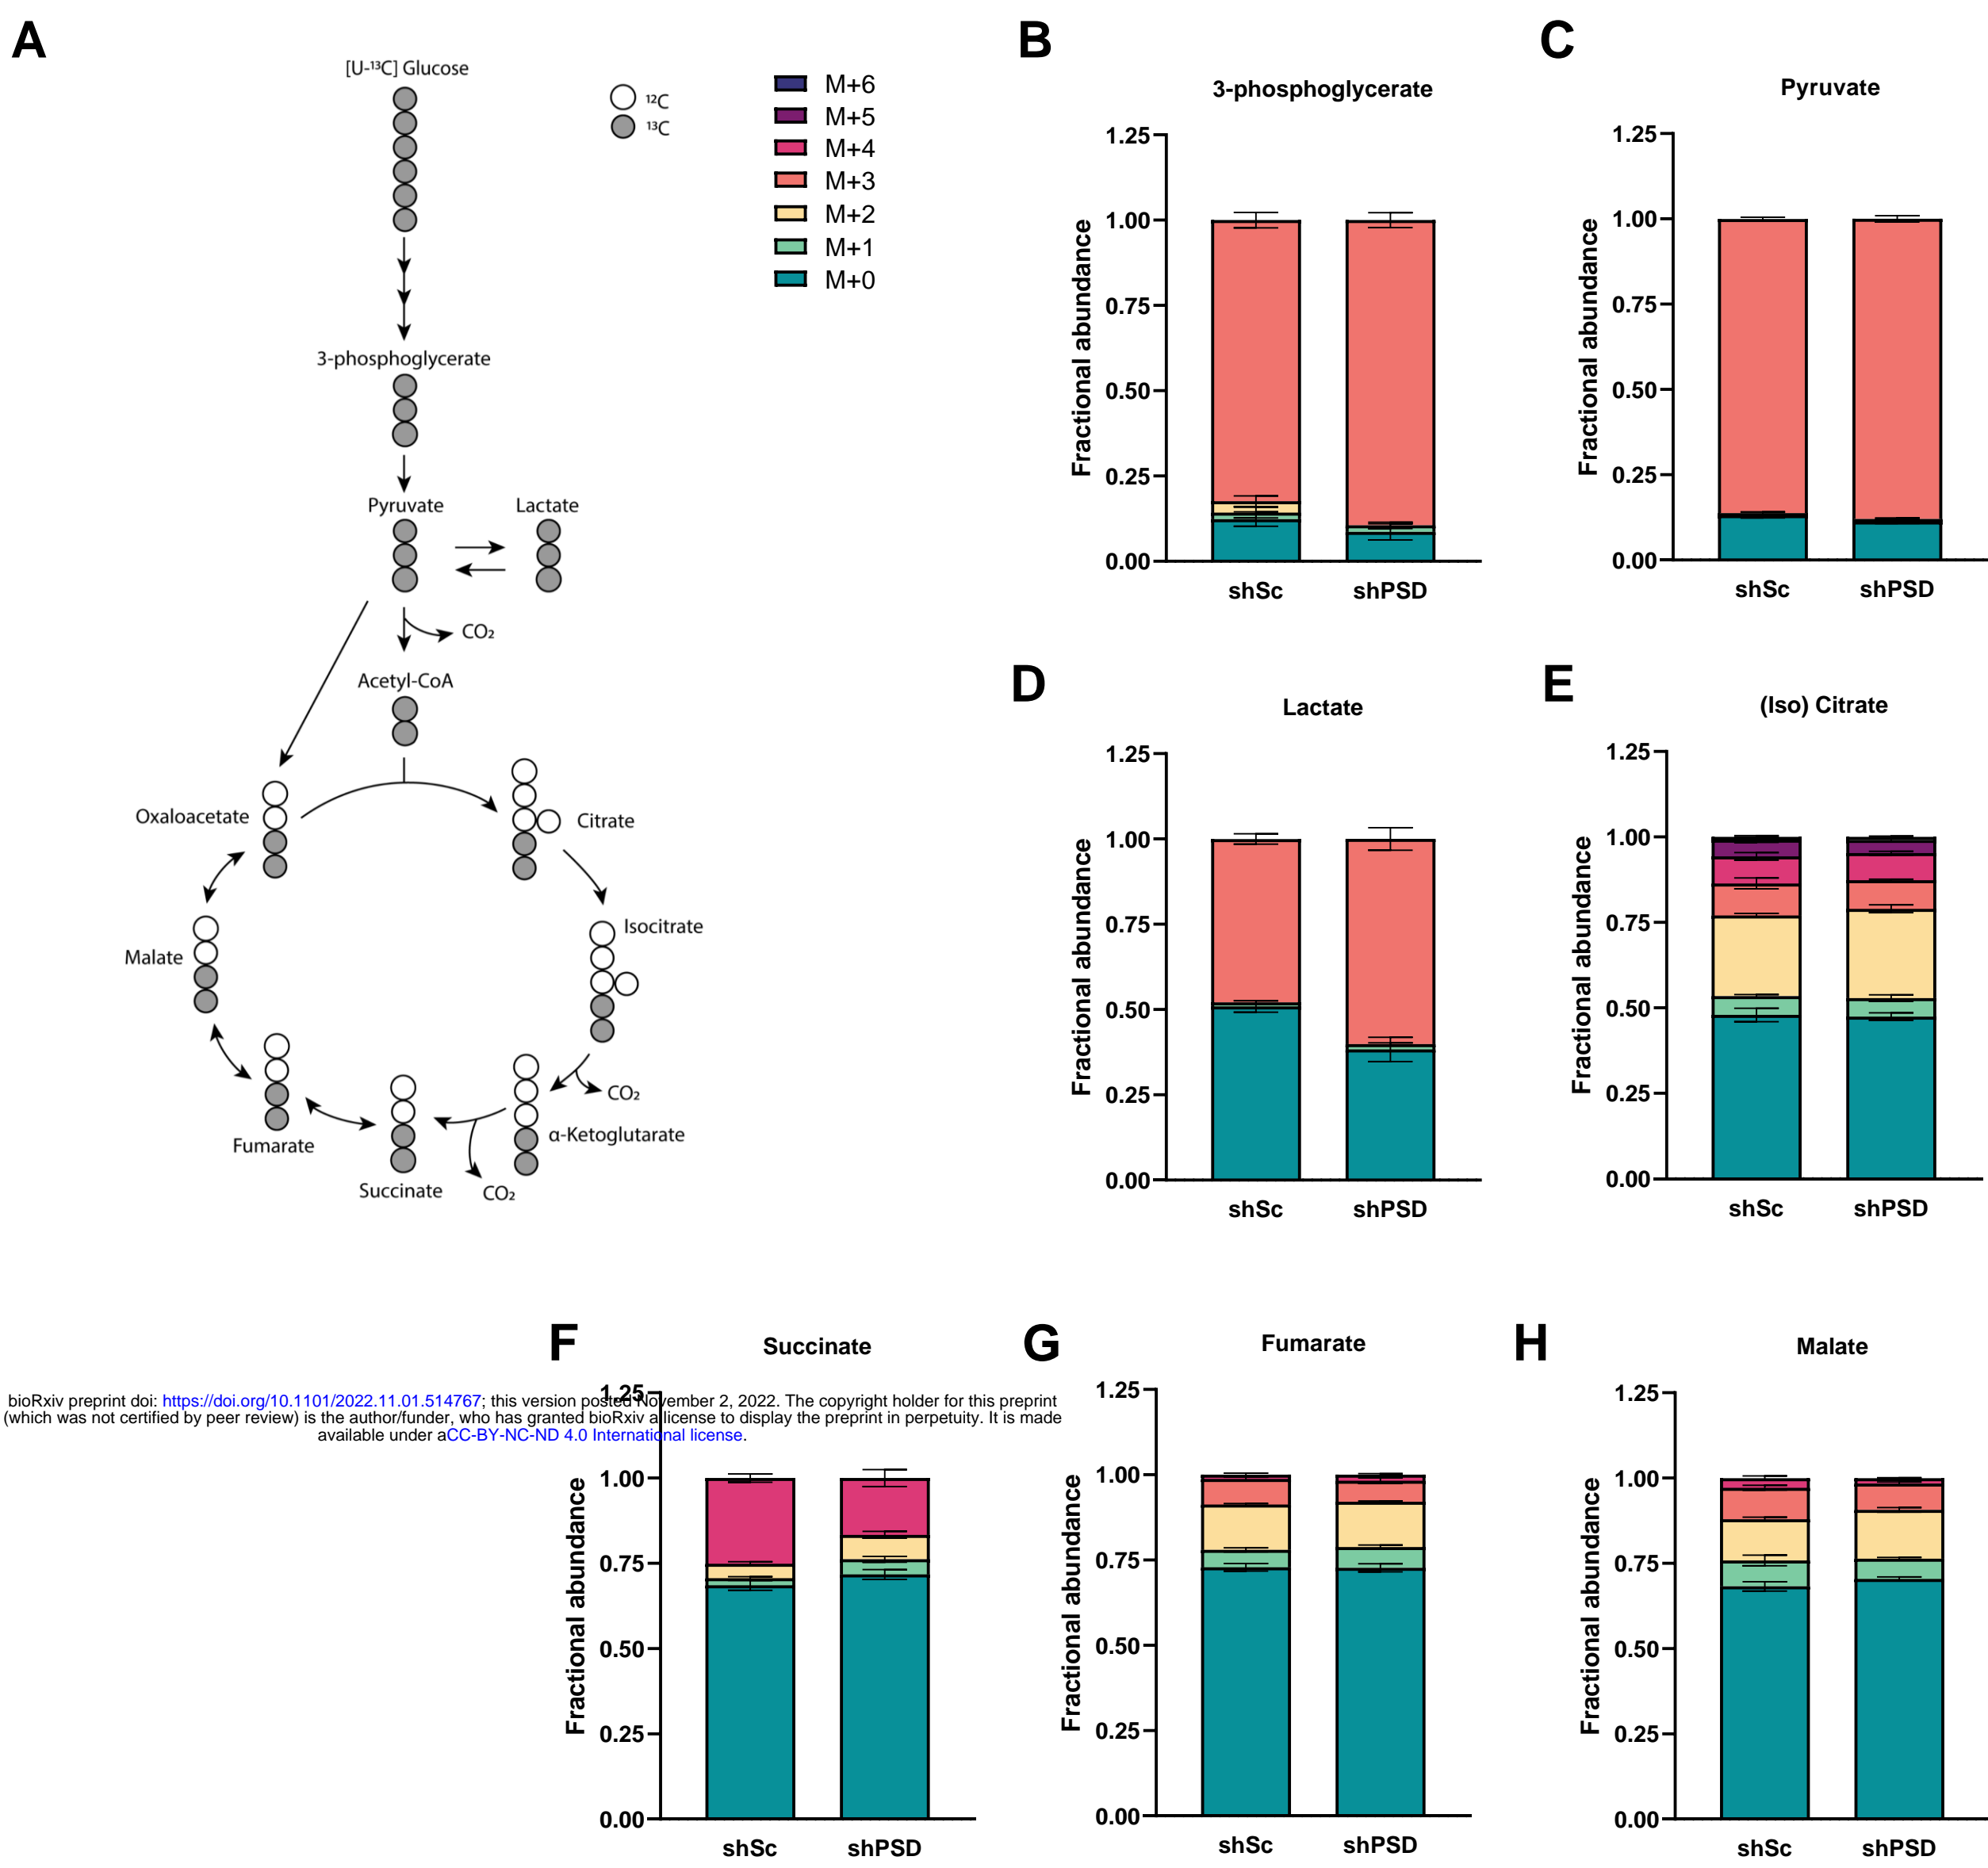

Figure 7 Supplement 1

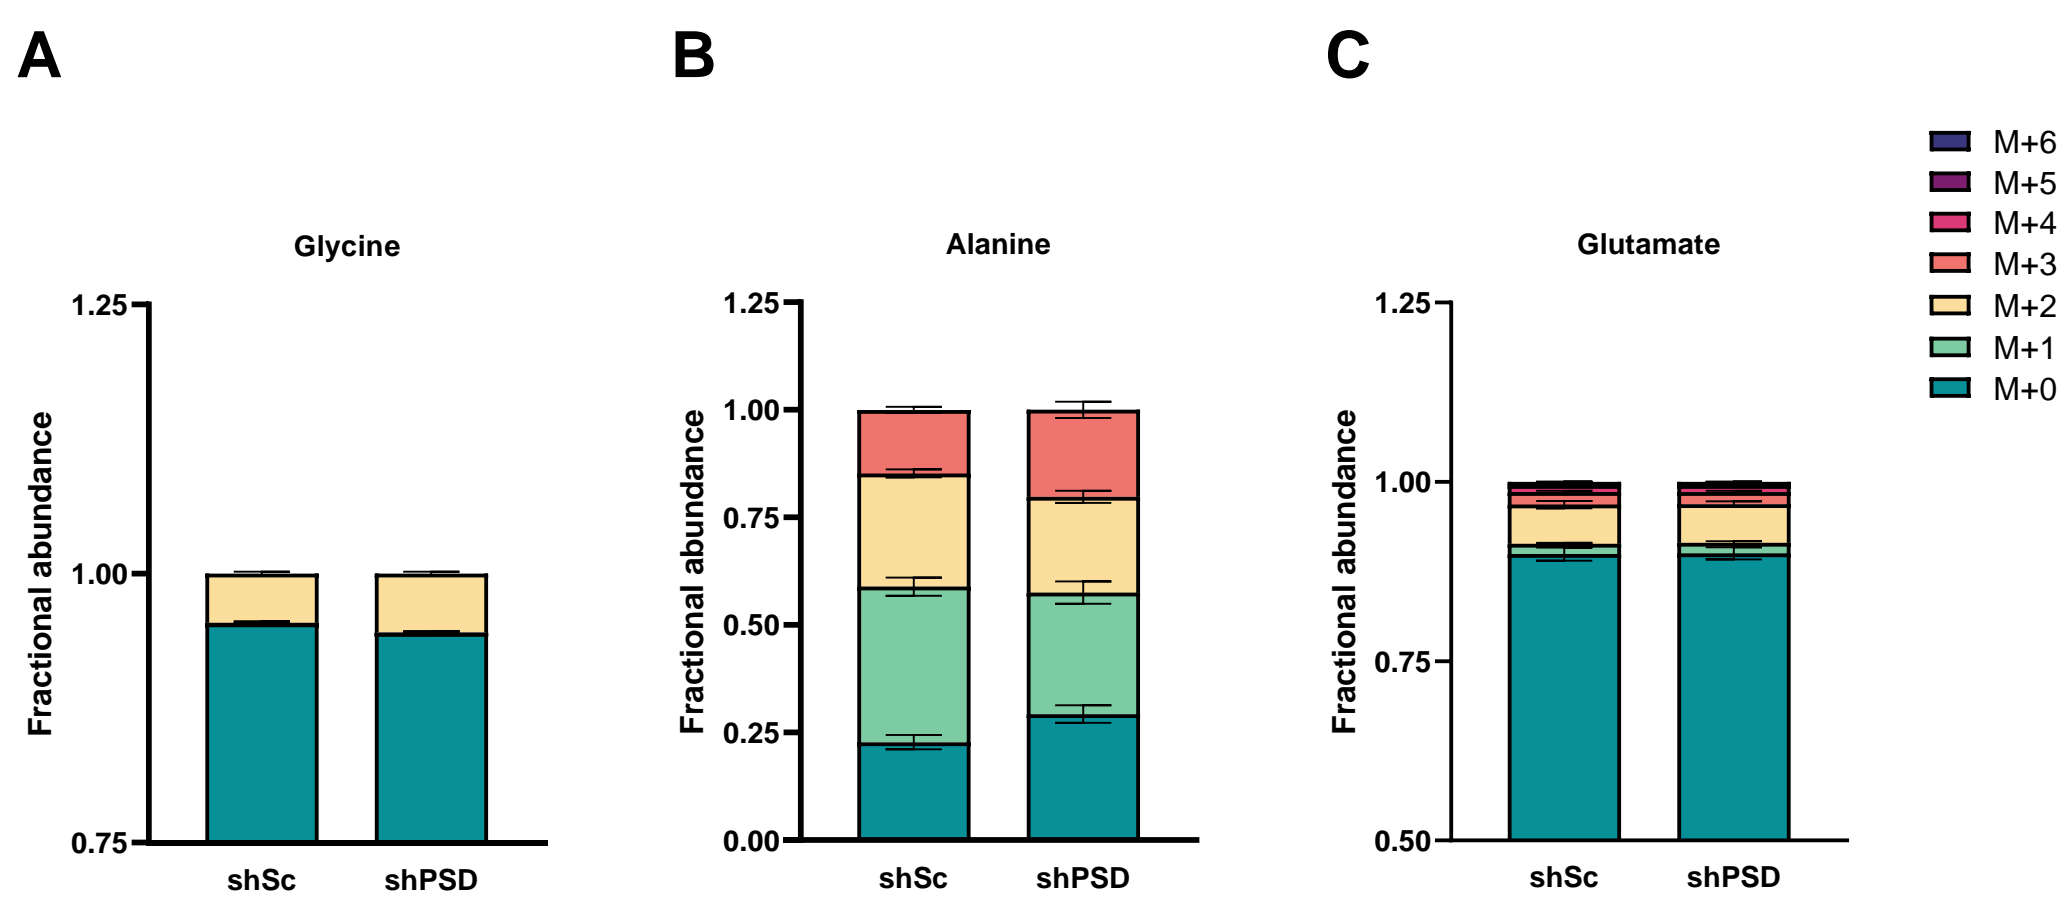

**Figure 8**

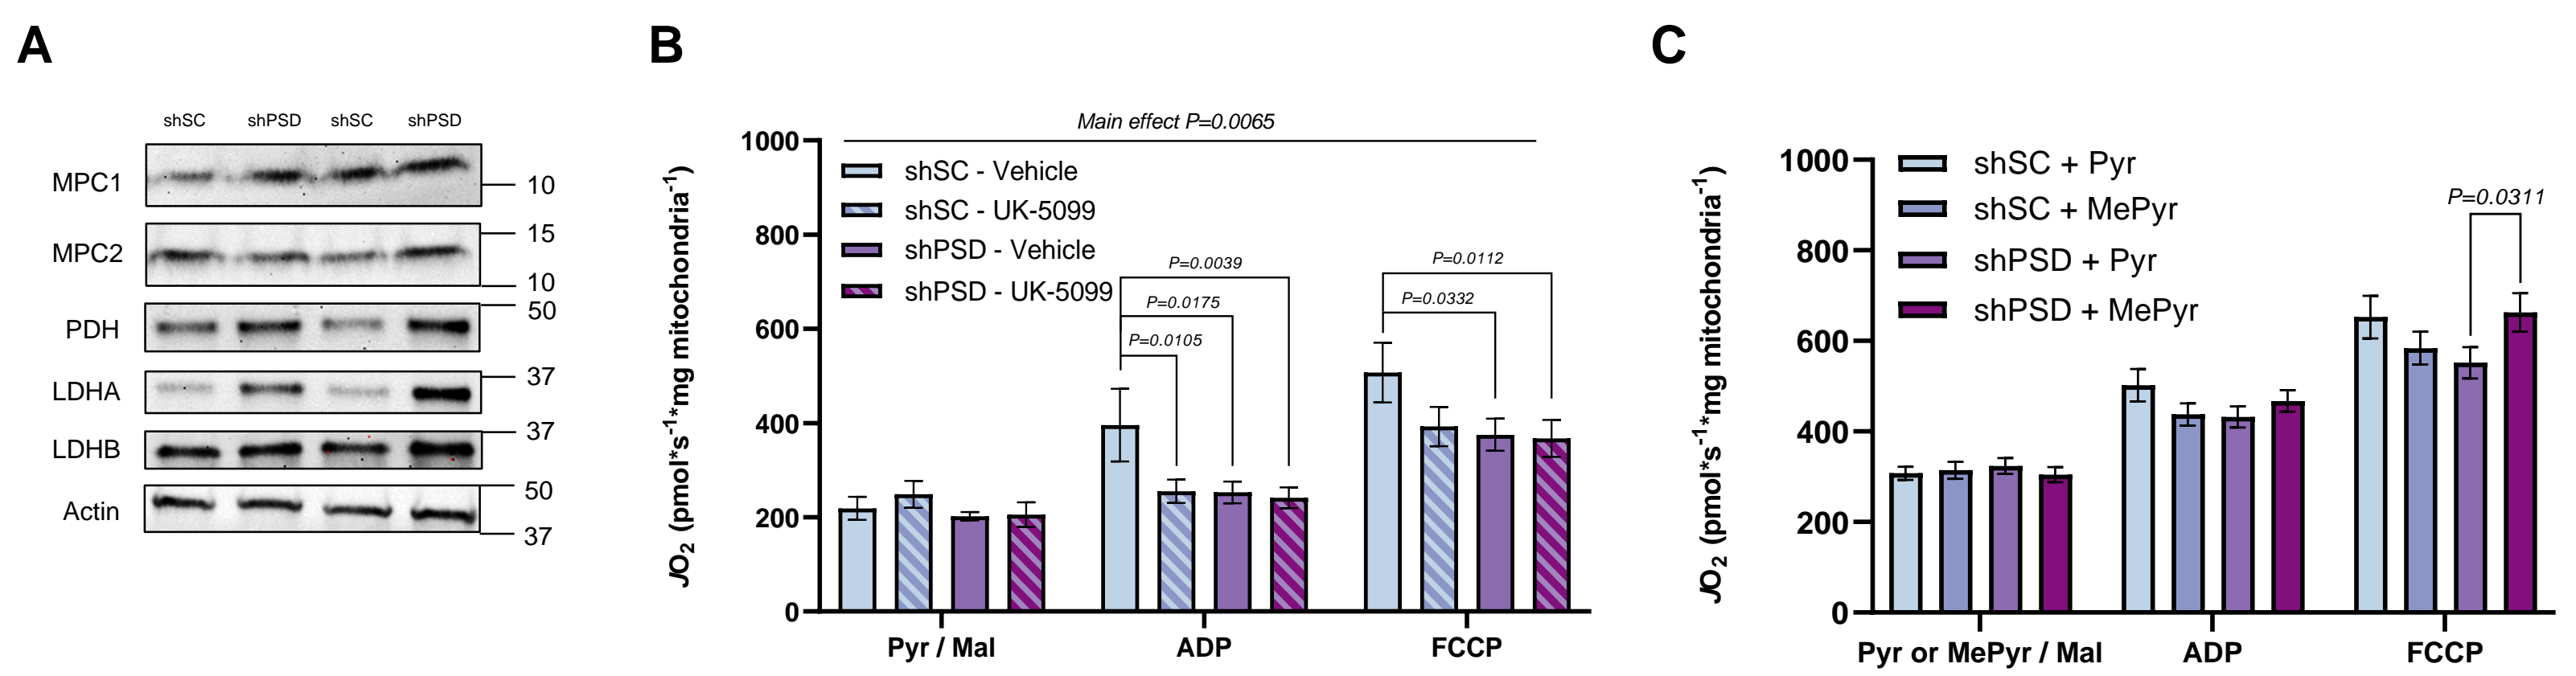

Figure 8 Supplement 1

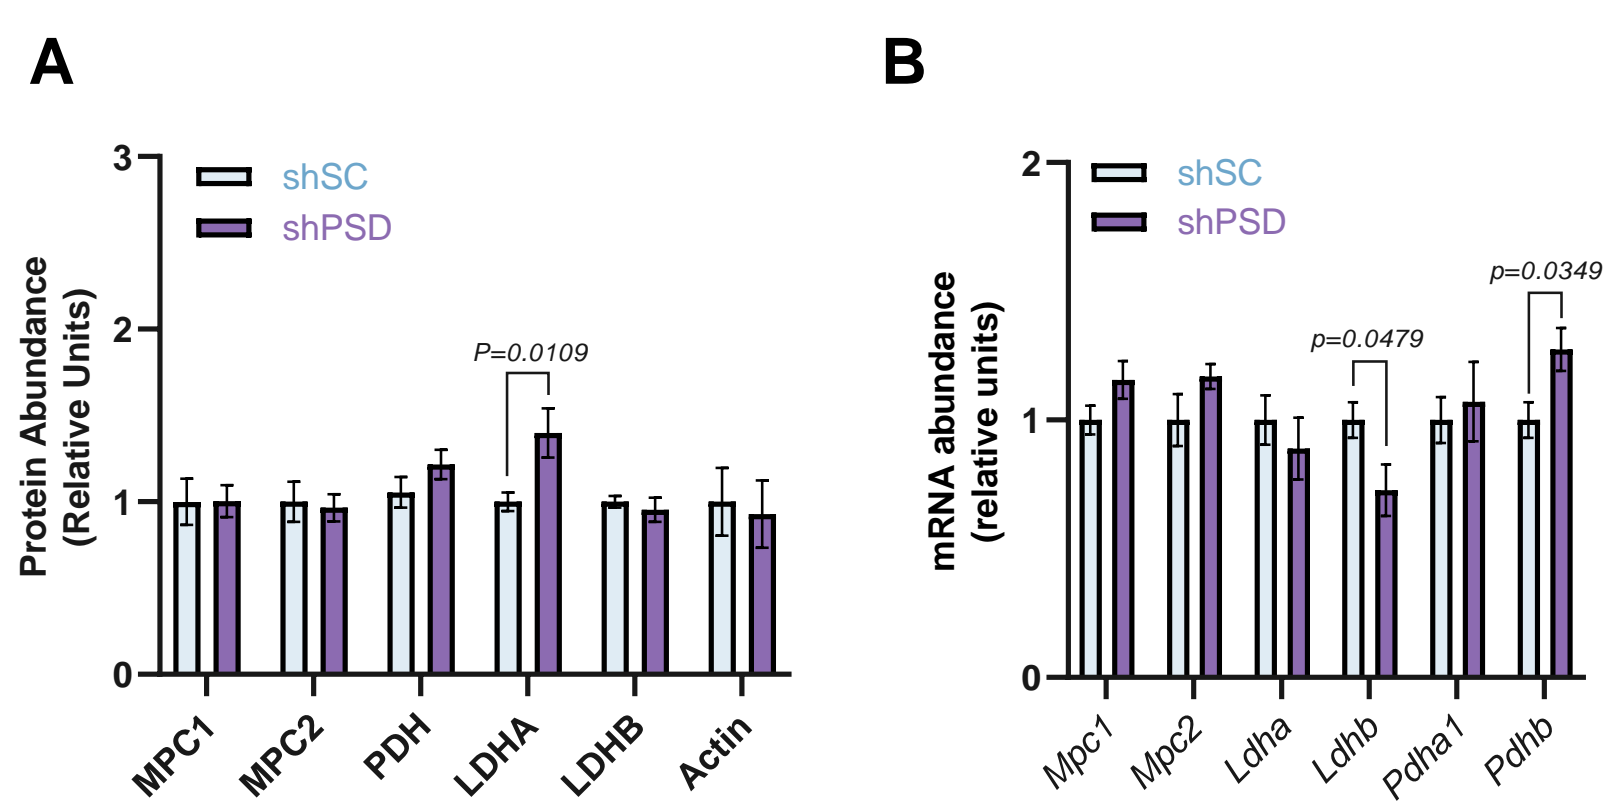

Source: https://www.biorxiv.org/content/10.1101/2022.11.01.514767v1.full.pdf
